# Supplementary material for: Construction of intermolecular σ-hole interactions in rare earth metallocene complexes using a 2,3,4,5-tetraiodopyrrolyl anion
Source: Royal Society of Chemistry journal article supplement (doi:10.1039/d4sc03786c), 2024-01-01
Supplement: d4sc03786c1.pdf [file d4sc03786c1.pdf]

## Supplementary Information

# Construction of intermolecular $\sigma$ -hole interactions in rare earth metallocene complexes using a 2,3,4,5-tetraiodopyrrolyl anion

Francis Delano IV,<sup>a</sup> Florian Benner,<sup>a</sup> Seoyun Jang,<sup>a</sup> Samuel M. Greer,<sup>b</sup> and Selvan Demir<sup>a\*</sup>

<sup>a</sup>Department of Chemistry, Michigan State University, 578 South Shaw Lane, East Lansing, Michigan 48824, USA

<sup>b</sup>Los Alamos National Laboratory (LANL), Los Alamos, New Mexico 87545, United States

\*Correspondence to: [sdemir@chemistry.msu.edu](mailto:sdemir@chemistry.msu.edu) (S.D.)

## Table of Contents

|                                                                                                                                       |           |
|---------------------------------------------------------------------------------------------------------------------------------------|-----------|
| <b>X-Ray Crystallography</b> .....                                                                                                    | <b>S7</b> |
| <b>Table S1.</b> Crystal data and structure refinement of Cp* <sub>2</sub> RE(TIP).....                                               | S7        |
| <b>Table S2.</b> Crystal data and structure refinement of Cp* <sub>2</sub> RE(TIP)<br>from 110 to 130 K.....                          | S8        |
| <b>Table S3.</b> Crystal data and structure refinement of Cp* <sub>2</sub> RE(TIP)<br>from 140 to 160 K.....                          | S9        |
| <b>Table S4.</b> Crystal data and structure refinement of Cp* <sub>2</sub> RE(TIP)<br>from 170 to 190 K.....                          | S10       |
| <b>Table S5.</b> Crystal data and structure refinement of Cp* <sub>2</sub> RE(TIP)<br>from 200 to 220 K.....                          | S11       |
| <b>Table S6.</b> Crystal data and structure refinement of Cp* <sub>2</sub> RE(TIP)<br>from 230 to 250 K.....                          | S12       |
| <b>Table S7.</b> Crystal data and structure refinement of Cp* <sub>2</sub> RE(TIP)<br>from 260 to 280 K.....                          | S13       |
| <b>Table S8.</b> Crystal data and structure refinement of Cp* <sub>2</sub> RE(TIP)<br>at 290 and 300 K.....                           | S14       |
| <b>Table S9.</b> Crystal data and structure refinement of Cp* <sub>2</sub> RE(DMP).....                                               | S15       |
| <b>Figure S1.</b> Structure of Cp* <sub>2</sub> Y(TIP), <b>1–Y</b> .....                                                              | S16       |
| <b>Figure S2.</b> Structure of Cp* <sub>2</sub> Y(TIP), <b>1–Y</b> , with thermal ellipsoids<br>drawn at 50%.....                     | S16       |
| <b>Figure S3.</b> Structure of Cp* <sub>2</sub> Gd(TIP), <b>1–Gd</b> .....                                                            | S17       |
| <b>Figure S4.</b> Structure of Cp* <sub>2</sub> Gd(TIP), <b>1–Gd</b> , with thermal ellipsoids<br>drawn at 50%.....                   | S17       |
| <b>Figure S5.</b> Structure of Cp* <sub>2</sub> Dy(TIP), <b>1–Dy</b> , with thermal ellipsoids<br>drawn at 50% from 100 to 260 K..... | S18       |
| <b>Figure S6.</b> Structure of Cp* <sub>2</sub> Dy(TIP), <b>1–Dy</b> , with thermal ellipsoids<br>drawn at 50% from 270 to 300 K..... | S19       |
| <b>Figure S7.</b> Labeled structure of Cp* <sub>2</sub> Y(TIP), <b>1–Y</b> .....                                                      | S19       |
| <b>Figure S8.</b> Unit Cell of Cp* <sub>2</sub> Dy(TIP), <b>1–Dy</b> .....                                                            | S20       |
| <b>Figure S9.</b> Temperature dependence of the Dy–N distance.....                                                                    | S20       |
| <b>Figure S10.</b> Temperature dependence of pyrrolyl interatomic distances.....                                                      | S21       |
| <b>Figure S11.</b> Temperature dependence of intermolecular<br>I <sup>1</sup> –I <sup>3</sup> interatomic distances.....              | S21       |
| <b>Figure S12.</b> Temperature dependence of intermolecular<br>I <sup>1</sup> –I <sup>4</sup> interatomic distances.....              | S22       |
| <b>Figure S13.</b> Temperature dependence of intermolecular<br>I <sup>3</sup> –I <sup>3</sup> interatomic distances.....              | S22       |
| <b>Figure S14.</b> Structure of Cp* <sub>2</sub> Y(DMP), <b>2–Y</b> .....                                                             | S23       |
| <b>Figure S15.</b> Structure of Cp* <sub>2</sub> Y(DMP), <b>2–Y</b> , with thermal ellipsoids<br>drawn at 50%.....                    | S23       |
| <b>Figure S16.</b> Structure of Cp* <sub>2</sub> Dy(DMP), <b>2–Dy</b> .....                                                           | S24       |
| <b>Figure S17.</b> Structure of Cp* <sub>2</sub> Dy(DMP), <b>2–Dy</b> , with thermal ellipsoids<br>drawn at 50%.....                  | S24       |
| <b>Figure S18.</b> Unit Cell of Cp* <sub>2</sub> Y(DMP), <b>2–Y</b> .....                                                             | S25       |

|                                                                                                                                                                                                                       |            |
|-----------------------------------------------------------------------------------------------------------------------------------------------------------------------------------------------------------------------|------------|
| <b>NMR Spectroscopy</b> .....                                                                                                                                                                                         | <b>S26</b> |
| <b>Figure S19.</b> $^1\text{H}$ NMR spectrum of TIPH .....                                                                                                                                                            | S26        |
| <b>Figure S20.</b> $^{13}\text{C}$ NMR spectrum of TIPH .....                                                                                                                                                         | S26        |
| <b>Figure S21.</b> $^1\text{H}$ NMR spectrum of $\text{Cp}^*_2\text{Y}(\text{TIP})$ , <b>1–Y</b> .....                                                                                                                | S27        |
| <b>Figure S22.</b> $^{13}\text{C}$ NMR spectrum of $\text{Cp}^*_2\text{Y}(\text{TIP})$ , <b>1–Y</b> .....                                                                                                             | S27        |
| <b>Figure S23.</b> $^1\text{H}$ – $^1\text{H}$ gCOSY spectrum of $\text{Cp}^*_2\text{Y}(\text{TIP})$ , <b>1–Y</b> .....                                                                                               | S27        |
| <b>Figure S24.</b> $^1\text{H}$ NMR spectrum of $\text{Cp}^*_2\text{Y}(\text{DMP})$ , <b>2–Y</b> .....                                                                                                                | S28        |
| <b>Figure S25.</b> $^{13}\text{C}\{^1\text{H}\}$ NMR spectrum of $\text{Cp}^*_2\text{Y}(\text{DMP})$ , <b>2–Y</b> .....                                                                                               | S29        |
| <b>Figure S26.</b> $^1\text{H}$ – $^1\text{H}$ gCOSY spectrum of $\text{Cp}^*_2\text{Y}(\text{DMP})$ , <b>2–Y</b> .....                                                                                               | S29        |
| <b>Figure S27.</b> $^1\text{H}$ – $^{13}\text{C}$ gHSQC spectrum of $\text{Cp}^*_2\text{Y}(\text{DMP})$ , <b>2–Y</b> .....                                                                                            | S30        |
| <br>                                                                                                                                                                                                                  |            |
| <b>IR Spectroscopy</b> .....                                                                                                                                                                                          | <b>S31</b> |
| <b>Figure S28.</b> FTIR spectrum of TIP .....                                                                                                                                                                         | S31        |
| <b>Figure S29.</b> FTIR spectrum of $\text{Cp}^*_2\text{Y}(\text{TIP})$ , <b>1–Y</b> .....                                                                                                                            | S31        |
| <b>Figure S30.</b> FTIR spectrum of $\text{Cp}^*_2\text{Gd}(\text{TIP})$ , <b>1–Gd</b> .....                                                                                                                          | S32        |
| <b>Figure S31.</b> FTIR spectrum of $\text{Cp}^*_2\text{Dy}(\text{TIP})$ , <b>1–Dy</b> .....                                                                                                                          | S32        |
| <b>Figure S32.</b> FTIR spectrum of $\text{Cp}^*_2\text{Y}(\text{DMP})$ , <b>2–Y</b> .....                                                                                                                            | S33        |
| <b>Figure S33.</b> FTIR spectrum of $\text{Cp}^*_2\text{Dy}(\text{TIP})$ , <b>2–Dy</b> .....                                                                                                                          | S33        |
| <br>                                                                                                                                                                                                                  |            |
| <b>UV-vis Spectroscopy</b> .....                                                                                                                                                                                      | <b>S34</b> |
| <b>Figure S34.</b> UV-vis absorption spectrum of $\text{Cp}^*_2\text{Y}(\text{TIP})$ , <b>1–Y</b> ,<br>with calculated transitions .....                                                                              | S34        |
| <b>Figure S35.</b> UV-vis absorption spectra of $\text{Cp}^*_2\text{RE}(\text{DMP})$ .....                                                                                                                            | S34        |
| <br>                                                                                                                                                                                                                  |            |
| <b>Magnetic Data</b> .....                                                                                                                                                                                            | <b>S35</b> |
| <b>Figure S36.</b> Variable-temperature dc magnetic susceptibility<br>data ( $\chi_{\text{M}}T$ vs. $T$ ) of $\text{Cp}^*_2\text{Gd}(\text{TIP})$ , <b>1–Gd</b> .....                                                 | S35        |
| <b>Figure S37.</b> Variable-temperature dc magnetic susceptibility<br>data ( $\chi_{\text{M}}T$ vs. $T$ ) of $\text{Cp}^*_2\text{Dy}(\text{TIP})$ , <b>1–Dy</b> .....                                                 | S35        |
| <b>Figure S38.</b> Variable-temperature dc magnetic susceptibility<br>data ( $\chi_{\text{M}}T$ vs. $T$ ) of $\text{Cp}^*_2\text{Dy}(\text{DMP})$ , <b>2–Dy</b> .....                                                 | S36        |
| <b>Figure S39.</b> In-phase ( $\chi_{\text{M}}'$ ) components of the ac magnetic<br>susceptibility for $\text{Cp}^*_2\text{Dy}(\text{TIP})$ , <b>1–Dy</b> , under zero applied dc field .....                         | S36        |
| <b>Figure S40.</b> Out-of-phase ( $\chi_{\text{M}}''$ ) components of the ac magnetic<br>susceptibility for $\text{Cp}^*_2\text{Dy}(\text{TIP})$ , <b>1–Dy</b> , under zero applied dc field .....                    | S37        |
| <b>Figure S41.</b> Cole–Cole plots for ac magnetic susceptibility of<br>$\text{Cp}^*_2\text{Dy}(\text{TIP})$ , <b>1–Dy</b> , collected under zero applied dc field .....                                              | S37        |
| <b>Figure S42.</b> Out-of-phase components of the ac magnetic<br>susceptibility ( $\chi_{\text{M}}''$ ) for $\text{Cp}^*_2\text{Dy}(\text{TIP})$ , <b>1–Dy</b> , ranging from 0 to<br>1500 Oe applied dc fields ..... | S38        |
| <b>Figure S43.</b> In-phase ( $\chi_{\text{M}}'$ ) components of the ac magnetic<br>susceptibility for $\text{Cp}^*_2\text{Dy}(\text{TIP})$ , <b>1–Dy</b> , under a 1250 Oe applied dc field .....                    | S38        |
| <b>Figure S44.</b> Out-of-phase ( $\chi_{\text{M}}''$ ) components of the ac<br>magnetic susceptibility for $\text{Cp}^*_2\text{Dy}(\text{TIP})$ , <b>1–Dy</b> , under<br>a 1250 Oe applied dc field .....            | S39        |

|                                                                                                                                                                                           |            |
|-------------------------------------------------------------------------------------------------------------------------------------------------------------------------------------------|------------|
| <b>Figure S45.</b> Cole–Cole plots for ac magnetic susceptibility of Cp* <sub>2</sub> Dy(TIP), <b>1–Dy</b> , collected under a 1250 Oe applied dc field.....                              | S39        |
| <b>Figure S46.</b> Plot of the natural log of the relaxation time, $\tau$ , vs. inverse temperature, $1/T$ , for Cp* <sub>2</sub> Dy(TIP), <b>1–Dy</b> .....                              | S40        |
| <b>Figure S47.</b> Field-dependent magnetization data for Cp* <sub>2</sub> Gd(TIP), <b>1–Gd</b> .....                                                                                     | S40        |
| <b>Figure S48.</b> Field-dependent reduced magnetization data for Cp* <sub>2</sub> Gd(TIP), <b>1–Gd</b> .....                                                                             | S41        |
| <b>Figure S49.</b> Field-dependent magnetization data for Cp* <sub>2</sub> Dy(TIP), <b>1–Dy</b> .....                                                                                     | S41        |
| <b>Figure S50.</b> Field-dependent reduced magnetization data for Cp* <sub>2</sub> Dy(TIP), <b>1–Dy</b> .....                                                                             | S42        |
| <b>Figure S51.</b> Variable-field magnetization ( $M$ ) data for Cp* <sub>2</sub> Dy(TIP), <b>1–Dy</b> .....                                                                              | S42        |
| <b>Figure S52.</b> Magnified variable-field magnetization ( $M$ ) data for Cp* <sub>2</sub> Dy(TIP), <b>1–Dy</b> .....                                                                    | S43        |
| <b>Figure S53.</b> Out-of-phase ( $\chi_M''$ ) components of the ac magnetic susceptibility for Cp* <sub>2</sub> Dy(DMP), <b>2–Dy</b> , under zero applied dc field.....                  | S43        |
| <b>Figure S54.</b> Out-of-phase components of the ac magnetic susceptibility ( $\chi_M''$ ) for Cp* <sub>2</sub> Dy(DMP), <b>2–Dy</b> , ranging from 0 to 1550 Oe applied dc fields ..... | S44        |
| <b>Figure S55.</b> In-phase ( $\chi_M'$ ) components of the ac magnetic susceptibility for Cp* <sub>2</sub> Dy(DMP), <b>2–Dy</b> , under a 1450 Oe applied dc field .....                 | S44        |
| <b>Figure S56.</b> Out-of-phase ( $\chi_M''$ ) components of the ac magnetic susceptibility for Cp* <sub>2</sub> Dy(DMP), <b>2–Dy</b> , under a 1450 Oe applied dc field .....            | S45        |
| <b>Figure S57.</b> Cole–Cole plots for ac magnetic susceptibility of Cp* <sub>2</sub> Dy(DMP), <b>2–Dy</b> , collected under a 1450 Oe applied dc field .....                             | S45        |
| <b>Figure S58.</b> Plot of the natural log of the relaxation time, $\tau$ , vs. inverse temperature, $1/T$ , for Cp* <sub>2</sub> Dy(DMP), <b>2–Dy</b> .....                              | S46        |
| <b>Figure S59.</b> Field-dependent magnetization data for Cp* <sub>2</sub> Dy(DMP), <b>2–Dy</b> .....                                                                                     | S46        |
| <b>Figure S60.</b> Field-dependent reduced magnetization data for Cp* <sub>2</sub> Dy(DMP), <b>2–Dy</b> .....                                                                             | S47        |
| <b>Figure S61.</b> Variable-field magnetization ( $M$ ) data for Cp* <sub>2</sub> Dy(DMP), <b>2–Dy</b> .....                                                                              | S47        |
| <b>EPR Spectroscopy</b> .....                                                                                                                                                             | <b>S48</b> |
| <b>Table S10.</b> Spin Hamiltonian parameters for Cp* <sub>2</sub> Gd(TIP) .....                                                                                                          | S48        |
| <b>Ab Initio Calculations</b> .....                                                                                                                                                       | <b>S49</b> |
| Method for CASSCF calculations.....                                                                                                                                                       | S49        |

|                                                                                                                                                                                                      |     |
|------------------------------------------------------------------------------------------------------------------------------------------------------------------------------------------------------|-----|
| <b>Table S11.</b> Calculated Kramers doublet (KD) energies, associated magnetic moments, <i>g</i> -tensors, and wavefunction composition for Cp* <sub>2</sub> Dy(TIP), <b>1–Dy</b> at 100 K.....     | S50 |
| <b>Table S12.</b> Calculated Kramers doublet (KD) energies, associated magnetic moments, <i>g</i> -tensors, and wavefunction composition for Cp* <sub>2</sub> Dy(TIP), <b>1–Dy</b> at 200 K.....     | S50 |
| <b>Table S13.</b> Calculated Kramers doublet (KD) energies, associated magnetic moments, <i>g</i> -tensors, and wavefunction composition for Cp* <sub>2</sub> Dy(TIP), <b>1–Dy</b> at 300 K.....     | S51 |
| <b>Table S14.</b> Calculated Kramers doublet (KD) energies, associated magnetic moments, <i>g</i> -tensors, and wavefunction composition for Cp* <sub>2</sub> Dy(DMP), <b>2–Dy</b> at 100 K .....    | S51 |
| <b>Table S15.</b> Calculated crystal field parameters for Cp* <sub>2</sub> Dy(TIP), <b>1–Dy</b> at 100 K.....                                                                                        | S52 |
| <b>Table S16.</b> Calculated crystal field parameters for Cp* <sub>2</sub> Dy(TIP), <b>1–Dy</b> at 200 K.....                                                                                        | S52 |
| <b>Table S17.</b> Calculated crystal field parameters for Cp* <sub>2</sub> Dy(TIP), <b>1–Dy</b> at 300 K.....                                                                                        | S53 |
| <b>Table S18.</b> Calculated crystal field parameters for Cp* <sub>2</sub> Dy(DMP), <b>2–Dy</b> at 100 K .....                                                                                       | S53 |
| <b>Table S19.</b> Calculated average transition dipole moments for Cp* <sub>2</sub> Dy(TIP), <b>1–Dy</b> at 100 K.....                                                                               | S54 |
| <b>Table S20.</b> Calculated average transition dipole moments for Cp* <sub>2</sub> Dy(TIP), <b>1–Dy</b> at 200 K.....                                                                               | S55 |
| <b>Table S21.</b> Calculated average transition dipole moments for Cp* <sub>2</sub> Dy(TIP), <b>1–Dy</b> at 300 K.....                                                                               | S56 |
| <b>Table S22.</b> Calculated average transition dipole moments for Cp* <sub>2</sub> Dy(DMP), <b>2–Dy</b> at 100 K .....                                                                              | S57 |
| <b>Figure S62.</b> Calculated full relaxation barrier for Cp* <sub>2</sub> Dy(TIP), <b>1–Dy</b> .....                                                                                                | S58 |
| <b>Figure S63.</b> Calculated full relaxation barrier for Cp* <sub>2</sub> Dy(DMP), <b>2–Dy</b> .....                                                                                                | S59 |
| <b>Figure S64.</b> Estimated relaxation barrier of Cp* <sub>2</sub> Dy(TIP), <b>1–Dy</b> , with relaxation pathways .....                                                                            | S60 |
| <b>Figure S65.</b> Estimated relaxation barrier of Cp* <sub>2</sub> Dy(DMP), <b>2–Dy</b> , with relaxation pathways .....                                                                            | S61 |
| <b>Figure S66.</b> Plot of <i>g</i> -tensor components of Cp* <sub>2</sub> Dy(TIP), <b>1–Dy</b> .....                                                                                                | S62 |
| <b>Figure S67.</b> Plot of <i>g</i> -tensor components of Cp* <sub>2</sub> Dy(DMP), <b>2–Dy</b> .....                                                                                                | S62 |
| <b>Table S23.</b> Spin-orbit coupling constants and Slater Condon parameters of <b>1–Dy</b> and <b>2–Dy</b> .....                                                                                    | S63 |
| <b>Figure S68.</b> Variable-temperature dc magnetic susceptibility data ( $\chi_{\text{M}}T$ vs. <i>T</i> ) of Cp* <sub>2</sub> Dy(TIP), <b>1–Dy</b> , with <i>ab initio</i> calculated values.....  | S64 |
| <b>Figure S69.</b> Variable-temperature dc magnetic susceptibility data ( $\chi_{\text{M}}T$ vs. <i>T</i> ) of Cp* <sub>2</sub> Dy(DMP), <b>2–Dy</b> , with <i>ab initio</i> calculated values ..... | S64 |
| <b>Figure S70.</b> Field-dependent magnetization data of Cp* <sub>2</sub> Dy(TIP), <b>1–Dy</b> , with the <i>ab initio</i> calculated values .....                                                   | S65 |

|                                                                                                                                                    |            |
|----------------------------------------------------------------------------------------------------------------------------------------------------|------------|
| <b>Figure S71.</b> Field-dependent magnetization data of Cp* <sub>2</sub> Dy(DMP), <b>2-Dy</b> , with the <i>ab initio</i> calculated values ..... | S65        |
| <b>DFT Calculations</b> .....                                                                                                                      | <b>S66</b> |
| Method for Estimating p <i>K</i> <sub>a</sub> values .....                                                                                         | S66        |
| <b>Table S24.</b> Computed Gibbs free energies and p <i>K</i> <sub>a</sub> values .....                                                            | S67        |
| <b>Table S25.</b> Computed energies of solvation .....                                                                                             | S67        |
| <b>Table S26.</b> Computed and average experimental bond metrics of Cp* <sub>2</sub> Y(TIP), <b>1-Y</b> .....                                      | S68        |
| <b>Table S27.</b> Computed and average experimental bond metrics of Cp* <sub>2</sub> Y(TIP), <b>1-Y</b> , highlighting the Y-TIP interaction ..... | S69        |
| <b>Figure S72.</b> Comparison of experimental FTIR spectrum and calculated stretching frequencies of Cp* <sub>2</sub> Y(TIP), <b>1-Y</b> .....     | S70        |
| <b>Table S28.</b> Major contributions of the TDDFT calculated transitions of <b>1-Y</b> .....                                                      | S71        |
| <b>Table S29.</b> Second order perturbation analysis of the NLMOs of <b>1-Y</b> .....                                                              | S74        |
| <b>Table S30.</b> Computed and average experimental bond metrics of Cp* <sub>2</sub> Y(DMP), <b>2-Y</b> .....                                      | S78        |
| <b>Table S31.</b> Computed and average experimental bond metrics of Cp* <sub>2</sub> Y(DMP), <b>2-Y</b> , highlighting the Y-DMP interaction ..... | S79        |
| <b>Figure S73.</b> Comparison of experimental FTIR spectrum and calculated stretching frequencies Cp* <sub>2</sub> Y(DMP), <b>2-Y</b> .....        | S80        |
| <b>Figure S74.</b> Frontier orbitals of Cp* <sub>2</sub> Y(DMP), <b>2-Y</b> .....                                                                  | S81        |
| <b>Table S32.</b> Second order perturbation analysis of the NLMOs of <b>2-Y</b> .....                                                              | S82        |
| <b>Table S33.</b> Optimized coordinates of Cp* <sub>2</sub> Y(TIP), <b>1-Y</b> .....                                                               | S85        |
| <b>Table S34.</b> Optimized coordinates of Cp* <sub>2</sub> Y(DMP), <b>2-Y</b> .....                                                               | S87        |
| <b>Table S35.</b> Optimized coordinates of Cp* <sub>2</sub> Dy(TIP), <b>1-Dy</b> at 100 K .....                                                    | S89        |
| <b>Table S36.</b> Optimized coordinates of Cp* <sub>2</sub> Dy(TIP), <b>1-Dy</b> at 200 K .....                                                    | S91        |
| <b>Table S37.</b> Optimized coordinates of Cp* <sub>2</sub> Dy(TIP), <b>1-Dy</b> at 300 K .....                                                    | S93        |
| <b>Table S38.</b> Optimized coordinates of Cp* <sub>2</sub> Dy(DMP), <b>2-Dy</b> at 100 K .....                                                    | S95        |
| <b>References</b> .....                                                                                                                            | S97        |

## X-Ray Crystallography

**Table S1.** Crystal data and structural refinement of Cp\*<sub>2</sub>RE(TIP), (RE = Y (**1–Y**), Gd (**1–Gd**), Dy (**1–Dy**)). **1–RE** crystallized with one dichloromethane solvent molecule in the lattice as: Cp\*<sub>2</sub>RE(TIP)·CH<sub>2</sub>Cl<sub>2</sub>.

| Compound                                             | <b>1–Y</b>                                                        | <b>1–Gd</b>                                                        | <b>1–Dy</b>                                                        |
|------------------------------------------------------|-------------------------------------------------------------------|--------------------------------------------------------------------|--------------------------------------------------------------------|
| Empirical formula                                    | C <sub>25</sub> H <sub>32</sub> Cl <sub>2</sub> I <sub>4</sub> NY | C <sub>25</sub> H <sub>32</sub> Cl <sub>2</sub> I <sub>4</sub> NGd | C <sub>25</sub> H <sub>32</sub> Cl <sub>2</sub> I <sub>4</sub> NDy |
| CCDC Number                                          | 2350214                                                           | 2350213                                                            | 2350192                                                            |
| Formula weight (g mol <sup>-1</sup> )                | 1013.92                                                           | 1082.26                                                            | 1087.51                                                            |
| Temperature (K)                                      | 100.0(2)                                                          | 99.8(6)                                                            | 100.01(10)                                                         |
| Crystal system                                       | Monoclinic                                                        | Monoclinic                                                         | Monoclinic                                                         |
| Space group                                          | <i>P</i> 2 <sub>1</sub> / <i>c</i>                                | <i>P</i> 2 <sub>1</sub> / <i>c</i>                                 | <i>P</i> 2 <sub>1</sub> / <i>c</i>                                 |
| Unit Cell Dimensions                                 |                                                                   |                                                                    |                                                                    |
| <i>a</i> (Å)                                         | 10.30610(10)                                                      | 10.3396(2)                                                         | 10.3100(2)                                                         |
| <i>b</i> (Å)                                         | 14.2414(2)                                                        | 14.3064(3)                                                         | 14.2475(2)                                                         |
| <i>c</i> (Å)                                         | 21.2495(4)                                                        | 21.2014(4)                                                         | 21.2431(4)                                                         |
| α (°)                                                | 90                                                                | 90                                                                 | 90                                                                 |
| β (°)                                                | 101.465(2)                                                        | 101.314(2)                                                         | 101.444(2)                                                         |
| γ (°)                                                | 90                                                                | 90                                                                 | 90                                                                 |
| Volume (Å <sup>3</sup> )                             | 3056.63(8)                                                        | 3075.22(11)                                                        | 3058.40(10)                                                        |
| <i>Z</i>                                             | 4                                                                 | 4                                                                  | 4                                                                  |
| ρ <sub>calc</sub> (g cm <sup>-3</sup> )              | 2.203                                                             | 2.338                                                              | 2.362                                                              |
| μ (mm <sup>-1</sup> )                                | 36.121                                                            | 6.361                                                              | 6.671                                                              |
| <i>F</i> (000)                                       | 1896.0                                                            | 1996.0                                                             | 2004.0                                                             |
| Crystal size (mm <sup>3</sup> )                      | 0.2 × 0.14 × 0.06                                                 | 0.38 × 0.22 × 0.08                                                 | 0.353 × 0.275 × 0.111                                              |
| Radiation                                            | Cu Kα (λ = 1.54184)                                               | Mo Kα (λ = 0.71073)                                                | Mo Kα (λ = 0.71073)                                                |
| 2θ range for data collection (°)                     | 7.52 to 160.552                                                   | 4.924 to 63.38                                                     | 4.942 to 63.436                                                    |
| Reflections collected                                | 17339                                                             | 36647                                                              | 37524                                                              |
| Independent reflections                              | 5979 <i>R</i> <sub>int</sub> = 0.0599                             | 8616 <i>R</i> <sub>int</sub> = 0.0426                              | 8694 <i>R</i> <sub>int</sub> = 0.0544                              |
| Data/restraints/parameters                           | 5979/6/317                                                        | 8616/0/308                                                         | 8694/6/317                                                         |
| Goodness-of-fit on <i>F</i> <sup>2</sup>             | 0.999                                                             | 1.064                                                              | 1.046                                                              |
| Final <i>R</i> indexes [ <i>I</i> ≥ 2σ ( <i>I</i> )] | <i>R</i> <sub>1</sub> = 0.0589, <i>wR</i> <sub>2</sub> = 0.1620   | <i>R</i> <sub>1</sub> = 0.0301, <i>wR</i> <sub>2</sub> = 0.0686    | <i>R</i> <sub>1</sub> = 0.0304, <i>wR</i> <sub>2</sub> = 0.0713    |
| Final <i>R</i> indexes [all data]                    | <i>R</i> <sub>1</sub> = 0.0646, <i>wR</i> <sub>2</sub> = 0.1699   | <i>R</i> <sub>1</sub> = 0.0375, <i>wR</i> <sub>2</sub> = 0.0719    | <i>R</i> <sub>1</sub> = 0.0380, <i>wR</i> <sub>2</sub> = 0.0749    |
| Largest diff. peak/hole (e Å <sup>-3</sup> )         | 2.38/-2.18                                                        | 2.13/-2.21                                                         | 1.60/-1.62                                                         |

**Table S2.** Crystal data and structural refinement of Cp\*<sub>2</sub>Dy(TIP), **1-Dy**, at 110 K (**1-Dy – 110 K**), 120 K (**1-Dy – 120 K**), and 130 K (**1-Dy – 130 K**). **1-Dy** crystallized with one dichloromethane solvent molecule in the lattice as: Cp\*<sub>2</sub>Dy(TIP)·CH<sub>2</sub>Cl<sub>2</sub>.

| Compound                                             | <b>1-Dy – 110 K</b>                                                | <b>1-Dy – 120 K</b>                                                | <b>1-Dy – 130 K</b>                                                |
|------------------------------------------------------|--------------------------------------------------------------------|--------------------------------------------------------------------|--------------------------------------------------------------------|
| Empirical formula                                    | C <sub>25</sub> H <sub>32</sub> Cl <sub>2</sub> l <sub>4</sub> NDy | C <sub>25</sub> H <sub>32</sub> Cl <sub>2</sub> l <sub>4</sub> NDy | C <sub>25</sub> H <sub>32</sub> Cl <sub>2</sub> l <sub>4</sub> NDy |
| CCDC Number                                          | 2350209                                                            | 2350204                                                            | 2350212                                                            |
| Formula weight (g mol <sup>-1</sup> )                | 1087.51                                                            | 1087.51                                                            | 1087.51                                                            |
| Temperature (K)                                      | 110.01(10)                                                         | 120.01(10)                                                         | 130.15(10)                                                         |
| Crystal system                                       | Monoclinic                                                         | Monoclinic                                                         | Monoclinic                                                         |
| Space group                                          | <i>P</i> 2 <sub>1</sub> / <i>c</i>                                 | <i>P</i> 2 <sub>1</sub> / <i>c</i>                                 | <i>P</i> 2 <sub>1</sub> / <i>c</i>                                 |
| Unit Cell Dimensions                                 |                                                                    |                                                                    |                                                                    |
| a (Å)                                                | 10.31657(18)                                                       | 10.32380(19)                                                       | 10.33049(19)                                                       |
| b (Å)                                                | 14.2556(2)                                                         | 14.2662(2)                                                         | 14.2778(2)                                                         |
| c (Å)                                                | 21.2459(4)                                                         | 21.2517(4)                                                         | 21.2557(4)                                                         |
| α (°)                                                | 90                                                                 | 90                                                                 | 90                                                                 |
| β (°)                                                | 101.4755(17)                                                       | 101.5232(18)                                                       | 101.5531(18)                                                       |
| γ (°)                                                | 90                                                                 | 90                                                                 | 90                                                                 |
| Volume (Å <sup>3</sup> )                             | 3062.15(9)                                                         | 3066.90(10)                                                        | 3071.64(10)                                                        |
| Z                                                    | 4                                                                  | 4                                                                  | 4                                                                  |
| ρ <sub>calc</sub> (g cm <sup>-3</sup> )              | 2.359                                                              | 2.355                                                              | 2.352                                                              |
| μ (mm <sup>-1</sup> )                                | 6.662                                                              | 6.652                                                              | 6.642                                                              |
| F(000)                                               | 2004.0                                                             | 2004.0                                                             | 2004.0                                                             |
| Crystal size (mm <sup>3</sup> )                      | 0.353 × 0.275 × 0.111                                              | 0.353 × 0.275 × 0.111                                              | 0.353 × 0.275 × 0.111                                              |
| Radiation                                            | Mo Kα (λ = 0.71073)                                                | Mo Kα (λ = 0.71073)                                                | Mo Kα (λ = 0.71073)                                                |
| 2θ range for data collection (°)                     | 4.94 to 63.47                                                      | 4.936 to 63.418                                                    | 4.934 to 63.384                                                    |
| Reflections collected                                | 37662                                                              | 37712                                                              | 37863                                                              |
| Independent reflections                              | 8713 <i>R</i> <sub>int</sub> = 0.0526                              | 8716 <i>R</i> <sub>int</sub> = 0.0505                              | 8742 <i>R</i> <sub>int</sub> = 0.0506                              |
| Data/restraints/parameters                           | 8713/6/317                                                         | 8716/6/317                                                         | 8742/6/317                                                         |
| Goodness-of-fit on <i>F</i> <sup>2</sup>             | 1.041                                                              | 1.040                                                              | 1.032                                                              |
| Final <i>R</i> indexes [ <i>I</i> ≥ 2σ ( <i>I</i> )] | <i>R</i> <sub>1</sub> = 0.0308, <i>wR</i> <sub>2</sub> = 0.0733    | <i>R</i> <sub>1</sub> = 0.0289, <i>wR</i> <sub>2</sub> = 0.0660    | <i>R</i> <sub>1</sub> = 0.0297, <i>wR</i> <sub>2</sub> = 0.0661    |
| Final <i>R</i> indexes [all data]                    | <i>R</i> <sub>1</sub> = 0.0389, <i>wR</i> <sub>2</sub> = 0.0770    | <i>R</i> <sub>1</sub> = 0.0376, <i>wR</i> <sub>2</sub> = 0.0697    | <i>R</i> <sub>1</sub> = 0.0394, <i>wR</i> <sub>2</sub> = 0.0704    |
| Largest diff. peak/hole (e Å <sup>-3</sup> )         | 1.51/-1.75                                                         | 1.21/-1.44                                                         | 1.16/-1.26                                                         |



**Table S3.** Crystal data and structural refinement of Cp\*<sub>2</sub>Dy(TIP), **1-Dy**, at 140 K (**1-Dy – 140 K**), 150 K (**1-Dy – 150 K**), and 160 K (**1-Dy – 160 K**). **1-Dy** crystallized with one dichloromethane solvent molecule in the lattice as: Cp\*<sub>2</sub>Dy(TIP)·CH<sub>2</sub>Cl<sub>2</sub>.

| Compound                                                     | <b>1-Dy – 140 K</b>                                                | <b>1-Dy – 150 K</b>                                                | <b>1-Dy – 160 K</b>                                                |
|--------------------------------------------------------------|--------------------------------------------------------------------|--------------------------------------------------------------------|--------------------------------------------------------------------|
| Empirical formula                                            | C <sub>25</sub> H <sub>32</sub> Cl <sub>2</sub> I <sub>4</sub> NDy | C <sub>25</sub> H <sub>32</sub> Cl <sub>2</sub> I <sub>4</sub> NDy | C <sub>25</sub> H <sub>32</sub> Cl <sub>2</sub> I <sub>4</sub> NDy |
| CCDC Number                                                  | 2350203                                                            | 2350207                                                            | 2350202                                                            |
| Formula weight (g mol <sup>-1</sup> )                        | 1087.51                                                            | 1087.51                                                            | 1087.51                                                            |
| Temperature (K)                                              | 140.15(10)                                                         | 150.0(1)                                                           | 160.0(1)                                                           |
| Crystal system                                               | Monoclinic                                                         | Monoclinic                                                         | Monoclinic                                                         |
| Space group                                                  | <i>P</i> 2 <sub>1</sub> / <i>c</i>                                 | <i>P</i> 2 <sub>1</sub> / <i>c</i>                                 | <i>P</i> 2 <sub>1</sub> / <i>c</i>                                 |
| Unit Cell Dimensions                                         |                                                                    |                                                                    |                                                                    |
| <i>a</i> (Å)                                                 | 10.33800(19)                                                       | 10.3440(2)                                                         | 10.3478(2)                                                         |
| <i>b</i> (Å)                                                 | 14.2897(3)                                                         | 14.3003(3)                                                         | 14.3119(3)                                                         |
| <i>c</i> (Å)                                                 | 21.2600(4)                                                         | 21.2652(4)                                                         | 21.2778(4)                                                         |
| $\alpha$ (°)                                                 | 90                                                                 | 90                                                                 | 90                                                                 |
| $\beta$ (°)                                                  | 101.5874(18)                                                       | 101.6271(19)                                                       | 101.6536(19)                                                       |
| $\gamma$ (°)                                                 | 90                                                                 | 90                                                                 | 90                                                                 |
| Volume (Å <sup>3</sup> )                                     | 3076.66(10)                                                        | 3081.07(11)                                                        | 3086.22(11)                                                        |
| <i>Z</i>                                                     | 4                                                                  | 4                                                                  | 4                                                                  |
| $\rho_{\text{calc}}$ (g cm <sup>-3</sup> )                   | 2.348                                                              | 2.344                                                              | 2.341                                                              |
| $\mu$ (mm <sup>-1</sup> )                                    | 6.631                                                              | 6.621                                                              | 6.610                                                              |
| <i>F</i> (000)                                               | 2004.0                                                             | 2004.0                                                             | 2004.0                                                             |
| Crystal size (mm <sup>3</sup> )                              | 0.353 × 0.275 × 0.111                                              | 0.353 × 0.275 × 0.111                                              | 0.353 × 0.275 × 0.111                                              |
| Radiation                                                    | Mo K $\alpha$ ( $\lambda$ = 0.71073)                               | Mo K $\alpha$ ( $\lambda$ = 0.71073)                               | Mo K $\alpha$ ( $\lambda$ = 0.71073)                               |
| 2 $\theta$ range for data collection (°)                     | 4.93 to 63.36                                                      | 4.928 to 63.52                                                     | 4.926 to 63.37                                                     |
| Reflections collected                                        | 37940                                                              | 38238                                                              | 38312                                                              |
| Independent reflections                                      | 8758 <i>R</i> <sub>int</sub> = 0.0511                              | 8771 <i>R</i> <sub>int</sub> = 0.0517                              | 8785 <i>R</i> <sub>int</sub> = 0.0524                              |
| Data/restraints/parameters                                   | 8758/6/317                                                         | 8771/6/317                                                         | 8785/6/317                                                         |
| Goodness-of-fit on <i>F</i> <sup>2</sup>                     | 1.028                                                              | 1.050                                                              | 1.059                                                              |
| Final <i>R</i> indexes [ <i>I</i> ≥ 2 $\sigma$ ( <i>I</i> )] | <i>R</i> <sub>1</sub> = 0.0297, <i>wR</i> <sub>2</sub> = 0.0664    | <i>R</i> <sub>1</sub> = 0.0293, <i>wR</i> <sub>2</sub> = 0.0648    | <i>R</i> <sub>1</sub> = 0.0297, <i>wR</i> <sub>2</sub> = 0.0654    |
| Final <i>R</i> indexes [all data]                            | <i>R</i> <sub>1</sub> = 0.0396, <i>wR</i> <sub>2</sub> = 0.0708    | <i>R</i> <sub>1</sub> = 0.0384, <i>wR</i> <sub>2</sub> = 0.0682    | <i>R</i> <sub>1</sub> = 0.0396, <i>wR</i> <sub>2</sub> = 0.0692    |
| Largest diff. peak/hole (e Å <sup>-3</sup> )                 | 1.16/-1.28                                                         | 1.02/-1.12                                                         | 1.23/-1.39                                                         |

**Table S4.** Crystal data and structural refinement of Cp\*<sub>2</sub>Dy(TIP), **1-Dy**, at 170 K (**1-Dy – 170 K**), 180 K (**1-Dy – 180 K**), and 190 K (**1-Dy – 190 K**). **1-Dy** crystallized with one dichloromethane solvent molecule in the lattice as: Cp\*<sub>2</sub>Dy(TIP)·CH<sub>2</sub>Cl<sub>2</sub>.

| Compound                                             | <b>1-Dy – 170 K</b>                                                | <b>1-Dy – 180 K</b>                                                | <b>1-Dy – 190 K</b>                                                |
|------------------------------------------------------|--------------------------------------------------------------------|--------------------------------------------------------------------|--------------------------------------------------------------------|
| Empirical formula                                    | C <sub>25</sub> H <sub>32</sub> Cl <sub>2</sub> l <sub>4</sub> NDy | C <sub>25</sub> H <sub>32</sub> Cl <sub>2</sub> l <sub>4</sub> NDy | C <sub>25</sub> H <sub>32</sub> Cl <sub>2</sub> l <sub>4</sub> NDy |
| CCDC Number                                          | 2350198                                                            | 2350200                                                            | 2350199                                                            |
| Formula weight (g mol <sup>-1</sup> )                | 1087.51                                                            | 1087.51                                                            | 1087.51                                                            |
| Temperature (K)                                      | 170.0(1)                                                           | 180.0(1)                                                           | 190.0(1)                                                           |
| Crystal system                                       | Monoclinic                                                         | Monoclinic                                                         | Monoclinic                                                         |
| Space group                                          | <i>P</i> 2 <sub>1</sub> / <i>c</i>                                 | <i>P</i> 2 <sub>1</sub> / <i>c</i>                                 | <i>P</i> 2 <sub>1</sub> / <i>c</i>                                 |
| Unit Cell Dimensions                                 |                                                                    |                                                                    |                                                                    |
| a (Å)                                                | 10.3485(2)                                                         | 10.3538(2)                                                         | 10.3596(2)                                                         |
| b (Å)                                                | 14.3166(3)                                                         | 14.3266(3)                                                         | 14.3374(3)                                                         |
| c (Å)                                                | 21.2970(5)                                                         | 21.3096(5)                                                         | 21.3250(5)                                                         |
| α (°)                                                | 90                                                                 | 90                                                                 | 90                                                                 |
| β (°)                                                | 101.719(2)                                                         | 101.766(2)                                                         | 101.800(2)                                                         |
| γ (°)                                                | 90                                                                 | 90                                                                 | 90                                                                 |
| Volume (Å <sup>3</sup> )                             | 3089.48(12)                                                        | 3094.51(13)                                                        | 3100.47(13)                                                        |
| Z                                                    | 4                                                                  | 4                                                                  | 4                                                                  |
| ρ <sub>calc</sub> (g cm <sup>-3</sup> )              | 2.338                                                              | 2.334                                                              | 2.330                                                              |
| μ (mm <sup>-1</sup> )                                | 6.603                                                              | 6.593                                                              | 6.580                                                              |
| F(000)                                               | 2004.0                                                             | 2004.0                                                             | 2004.0                                                             |
| Crystal size (mm <sup>3</sup> )                      | 0.353 × 0.275 × 0.111                                              | 0.353 × 0.275 × 0.111                                              | 0.353 × 0.275 × 0.111                                              |
| Radiation                                            | Mo Kα (λ = 0.71073)                                                | Mo Kα (λ = 0.71073)                                                | Mo Kα (λ = 0.71073)                                                |
| 2θ range for data collection (°)                     | 4.926 to 63.358                                                    | 4.922 to 63.56                                                     | 4.92 to 63.514                                                     |
| Reflections collected                                | 38295                                                              | 38434                                                              | 38506                                                              |
| Independent reflections                              | 8797 <i>R</i> <sub>int</sub> = 0.0516                              | 8816 <i>R</i> <sub>int</sub> = 0.0541                              | 8841 <i>R</i> <sub>int</sub> = 0.0547                              |
| Data/restraints/parameters                           | 8797/6/317                                                         | 8816/6/317                                                         | 8841/6/317                                                         |
| Goodness-of-fit on <i>F</i> <sup>2</sup>             | 1.050                                                              | 1.057                                                              | 1.039                                                              |
| Final <i>R</i> indexes [ <i>I</i> ≥ 2σ ( <i>I</i> )] | <i>R</i> <sub>1</sub> = 0.0306, <i>wR</i> <sub>2</sub> = 0.0677    | <i>R</i> <sub>1</sub> = 0.0316, <i>wR</i> <sub>2</sub> = 0.0706    | <i>R</i> <sub>1</sub> = 0.0321, <i>wR</i> <sub>2</sub> = 0.0721    |
| Final <i>R</i> indexes [all data]                    | <i>R</i> <sub>1</sub> = 0.0421, <i>wR</i> <sub>2</sub> = 0.0723    | <i>R</i> <sub>1</sub> = 0.0438, <i>wR</i> <sub>2</sub> = 0.0756    | <i>R</i> <sub>1</sub> = 0.0442, <i>wR</i> <sub>2</sub> = 0.0767    |
| Largest diff. peak/hole (e Å <sup>-3</sup> )         | 1.10/-1.12                                                         | 1.12/-1.44                                                         | 1.09/-1.51                                                         |

**Table S5.** Crystal data and structural refinement of Cp\*<sub>2</sub>Dy(TIP), **1-Dy**, at 200 K (**1-Dy – 200 K**), 210 K (**1-Dy – 210 K**), and 220 K (**1-Dy – 220 K**). **1-Dy** crystallized with one dichloromethane solvent molecule in the lattice as: Cp\*<sub>2</sub>Dy(TIP)·CH<sub>2</sub>Cl<sub>2</sub>.

| Compound                                             | <b>1-Dy – 200 K</b>                                                | <b>1-Dy – 210 K</b>                                                | <b>1-Dy – 220 K</b>                                                |
|------------------------------------------------------|--------------------------------------------------------------------|--------------------------------------------------------------------|--------------------------------------------------------------------|
| Empirical formula                                    | C <sub>25</sub> H <sub>32</sub> Cl <sub>2</sub> l <sub>4</sub> NDy | C <sub>25</sub> H <sub>32</sub> Cl <sub>2</sub> l <sub>4</sub> NDy | C <sub>25</sub> H <sub>32</sub> Cl <sub>2</sub> l <sub>4</sub> NDy |
| CCDC Number                                          | 2350196                                                            | 2350211                                                            | 2350206                                                            |
| Formula weight (g mol <sup>-1</sup> )                | 1087.51                                                            | 1087.51                                                            | 1087.51                                                            |
| Temperature (K)                                      | 200.0(1)                                                           | 210.0(1)                                                           | 220.0(1)                                                           |
| Crystal system                                       | Monoclinic                                                         | Monoclinic                                                         | Monoclinic                                                         |
| Space group                                          | <i>P</i> 2 <sub>1</sub> / <i>c</i>                                 | <i>P</i> 2 <sub>1</sub> / <i>c</i>                                 | <i>P</i> 2 <sub>1</sub> / <i>c</i>                                 |
| Unit Cell Dimensions                                 |                                                                    |                                                                    |                                                                    |
| a (Å)                                                | 10.3635(2)                                                         | 10.3697(2)                                                         | 10.3772(2)                                                         |
| b (Å)                                                | 14.3461(3)                                                         | 14.3573(3)                                                         | 14.3687(3)                                                         |
| c (Å)                                                | 21.3369(5)                                                         | 21.3576(5)                                                         | 21.3762(5)                                                         |
| α (°)                                                | 90                                                                 | 90                                                                 | 90                                                                 |
| β (°)                                                | 101.833(2)                                                         | 101.856(2)                                                         | 101.907(2)                                                         |
| γ (°)                                                | 90                                                                 | 90                                                                 | 90                                                                 |
| Volume (Å <sup>3</sup> )                             | 3104.86(13)                                                        | 3111.93(12)                                                        | 3118.76(13)                                                        |
| Z                                                    | 4                                                                  | 4                                                                  | 4                                                                  |
| ρ <sub>calc</sub> (g cm <sup>-3</sup> )              | 2.326                                                              | 2.321                                                              | 2.316                                                              |
| μ (mm <sup>-1</sup> )                                | 6.571                                                              | 6.556                                                              | 6.541                                                              |
| F(000)                                               | 2004.0                                                             | 2004.0                                                             | 2004.0                                                             |
| Crystal size (mm <sup>3</sup> )                      | 0.353 × 0.275 × 0.111                                              | 0.353 × 0.275 × 0.111                                              | 0.353 × 0.275 × 0.111                                              |
| Radiation                                            | Mo Kα (λ = 0.71073)                                                | Mo Kα (λ = 0.71073)                                                | Mo Kα (λ = 0.71073)                                                |
| 2θ range for data collection (°)                     | 4.918 to 63.358                                                    | 4.916 to 63.306                                                    | 4.912 to 63.456                                                    |
| Reflections collected                                | 38696                                                              | 38782                                                              | 39005                                                              |
| Independent reflections                              | 8865 <i>R</i> <sub>int</sub> = 0.0542                              | 8878 <i>R</i> <sub>int</sub> = 0.0558                              | 8903 <i>R</i> <sub>int</sub> = 0.0563                              |
| Data/restraints/parameters                           | 8865/6/317                                                         | 8878/6/317                                                         | 8903/6/317                                                         |
| Goodness-of-fit on <i>F</i> <sup>2</sup>             | 1.055                                                              | 1.051                                                              | 1.054                                                              |
| Final <i>R</i> indexes [ <i>I</i> ≥ 2σ ( <i>I</i> )] | <i>R</i> <sub>1</sub> = 0.0318, <i>wR</i> <sub>2</sub> = 0.0697    | <i>R</i> <sub>1</sub> = 0.0331, <i>wR</i> <sub>2</sub> = 0.0727    | <i>R</i> <sub>1</sub> = 0.0334, <i>wR</i> <sub>2</sub> = 0.0743    |
| Final <i>R</i> indexes [all data]                    | <i>R</i> <sub>1</sub> = 0.0438, <i>wR</i> <sub>2</sub> = 0.0740    | <i>R</i> <sub>1</sub> = 0.0457, <i>wR</i> <sub>2</sub> = 0.0773    | <i>R</i> <sub>1</sub> = 0.0467, <i>wR</i> <sub>2</sub> = 0.0792    |
| Largest diff. peak/hole (e Å <sup>-3</sup> )         | 1.01/-1.36                                                         | 1.12/-1.47                                                         | 1.19/-1.44                                                         |

**Table S6.** Crystal data and structural refinement of Cp\*<sub>2</sub>Dy(TIP), **1-Dy**, at 230 K (**1-Dy – 230 K**), 240 K (**1-Dy – 240 K**), and 250 K (**1-Dy – 250 K**). **1-Dy** crystallized with one dichloromethane solvent molecule in the lattice as: Cp\*<sub>2</sub>Dy(TIP)·CH<sub>2</sub>Cl<sub>2</sub>.

| Compound                                             | <b>1-Dy – 230 K</b>                                                | <b>1-Dy – 240 K</b>                                                | <b>1-Dy – 250 K</b>                                                |
|------------------------------------------------------|--------------------------------------------------------------------|--------------------------------------------------------------------|--------------------------------------------------------------------|
| Empirical formula                                    | C <sub>25</sub> H <sub>32</sub> Cl <sub>2</sub> l <sub>4</sub> NDy | C <sub>25</sub> H <sub>32</sub> Cl <sub>2</sub> l <sub>4</sub> NDy | C <sub>25</sub> H <sub>32</sub> Cl <sub>2</sub> l <sub>4</sub> NDy |
| CCDC Number                                          | 2350210                                                            | 2350208                                                            | 2350197                                                            |
| Formula weight (g mol <sup>-1</sup> )                | 1087.51                                                            | 1087.51                                                            | 1087.51                                                            |
| Temperature (K)                                      | 230.0(1)                                                           | 240.0(1)                                                           | 250.0(1)                                                           |
| Crystal system                                       | Monoclinic                                                         | Monoclinic                                                         | Monoclinic                                                         |
| Space group                                          | <i>P</i> 2 <sub>1</sub> / <i>c</i>                                 | <i>P</i> 2 <sub>1</sub> / <i>c</i>                                 | <i>P</i> 2 <sub>1</sub> / <i>c</i>                                 |
| Unit Cell Dimensions                                 |                                                                    |                                                                    |                                                                    |
| a (Å)                                                | 10.3816(2)                                                         | 10.3865(2)                                                         | 10.3931(3)                                                         |
| b (Å)                                                | 14.3751(3)                                                         | 14.3825(3)                                                         | 14.3920(4)                                                         |
| c (Å)                                                | 21.3967(5)                                                         | 21.4194(5)                                                         | 21.4414(6)                                                         |
| α (°)                                                | 90                                                                 | 90                                                                 | 90                                                                 |
| β (°)                                                | 101.960(2)                                                         | 102.000(2)                                                         | 102.072(3)                                                         |
| γ (°)                                                | 90                                                                 | 90                                                                 | 90                                                                 |
| Volume (Å <sup>3</sup> )                             | 3123.84(13)                                                        | 3129.79(13)                                                        | 3136.21(14)                                                        |
| Z                                                    | 4                                                                  | 4                                                                  | 4                                                                  |
| ρ <sub>calc</sub> (g cm <sup>-3</sup> )              | 2.312                                                              | 2.308                                                              | 2.303                                                              |
| μ (mm <sup>-1</sup> )                                | 6.531                                                              | 6.518                                                              | 6.505                                                              |
| F(000)                                               | 2004.0                                                             | 2004.0                                                             | 2004.0                                                             |
| Crystal size (mm <sup>3</sup> )                      | 0.353 × 0.275 × 0.111                                              | 0.353 × 0.275 × 0.111                                              | 0.353 × 0.275 × 0.111                                              |
| Radiation                                            | Mo Kα (λ = 0.71073)                                                | Mo Kα (λ = 0.71073)                                                | Mo Kα (λ = 0.71073)                                                |
| 2θ range for data collection (°)                     | 4.91 to 63.234                                                     | 4.908 to 63.582                                                    | 4.906 to 63.506                                                    |
| Reflections collected                                | 39034                                                              | 39147                                                              | 39250                                                              |
| Independent reflections                              | 8896 <i>R</i> <sub>int</sub> = 0.0572                              | 8935 <i>R</i> <sub>int</sub> = 0.0562                              | 8957 <i>R</i> <sub>int</sub> = 0.0575                              |
| Data/restraints/parameters                           | 8896/6/317                                                         | 8935/6/317                                                         | 8957/6/317                                                         |
| Goodness-of-fit on <i>F</i> <sup>2</sup>             | 1.055                                                              | 1.045                                                              | 1.039                                                              |
| Final <i>R</i> indexes [ <i>I</i> ≥ 2σ ( <i>I</i> )] | <i>R</i> <sub>1</sub> = 0.0339, <i>wR</i> <sub>2</sub> = 0.0746    | <i>R</i> <sub>1</sub> = 0.0341, <i>wR</i> <sub>2</sub> = 0.0741    | <i>R</i> <sub>1</sub> = 0.0364, <i>wR</i> <sub>2</sub> = 0.0795    |
| Final <i>R</i> indexes [all data]                    | <i>R</i> <sub>1</sub> = 0.0486, <i>wR</i> <sub>2</sub> = 0.0802    | <i>R</i> <sub>1</sub> = 0.0500, <i>wR</i> <sub>2</sub> = 0.0797    | <i>R</i> <sub>1</sub> = 0.0531, <i>wR</i> <sub>2</sub> = 0.0853    |
| Largest diff. peak/hole (e Å <sup>-3</sup> )         | 1.12/-1.27                                                         | 0.92/-1.35                                                         | 0.96/-1.26                                                         |

**Table S7.** Crystal data and structural refinement of Cp\*<sub>2</sub>Dy(TIP), **1-Dy**, at 260 K (**1-Dy – 260 K**), 270 K (**1-Dy – 270 K**), and 280 K (**1-Dy – 280 K**). **1-Dy** crystallized with one dichloromethane solvent molecule in the lattice as: Cp\*<sub>2</sub>Dy(TIP)·CH<sub>2</sub>Cl<sub>2</sub>.

| Compound                                     | <b>1-Dy – 260 K</b>                                                | <b>1-Dy – 270 K</b>                                                | <b>1-Dy – 280 K</b>                                                |
|----------------------------------------------|--------------------------------------------------------------------|--------------------------------------------------------------------|--------------------------------------------------------------------|
| Empirical formula                            | C <sub>25</sub> H <sub>32</sub> Cl <sub>2</sub> l <sub>4</sub> NDy | C <sub>25</sub> H <sub>32</sub> Cl <sub>2</sub> l <sub>4</sub> NDy | C <sub>25</sub> H <sub>32</sub> Cl <sub>2</sub> l <sub>4</sub> NDy |
| CCDC Number                                  | 2350205                                                            | 2350195                                                            | 2350201                                                            |
| Formula weight (g mol <sup>-1</sup> )        | 1087.51                                                            | 1087.51                                                            | 1087.51                                                            |
| Temperature (K)                              | 260.0(1)                                                           | 270.0(1)                                                           | 280.0(1)                                                           |
| Crystal system                               | Monoclinic                                                         | Monoclinic                                                         | Monoclinic                                                         |
| Space group                                  | <i>P</i> 2 <sub>1</sub> / <i>c</i>                                 | <i>P</i> 2 <sub>1</sub> / <i>c</i>                                 | <i>P</i> 2 <sub>1</sub> / <i>c</i>                                 |
| Unit Cell Dimensions                         |                                                                    |                                                                    |                                                                    |
| a (Å)                                        | 10.3990(3)                                                         | 10.4052(3)                                                         | 10.4058(3)                                                         |
| b (Å)                                        | 14.3997(4)                                                         | 14.4040(4)                                                         | 14.4072(4)                                                         |
| c (Å)                                        | 21.4703(6)                                                         | 21.4880(7)                                                         | 21.5108(7)                                                         |
| α (°)                                        | 90                                                                 | 90                                                                 | 90                                                                 |
| β (°)                                        | 102.143(3)                                                         | 102.191(3)                                                         | 102.195(3)                                                         |
| γ (°)                                        | 90                                                                 | 90                                                                 | 90                                                                 |
| Volume (Å <sup>3</sup> )                     | 3143.08(16)                                                        | 3147.91(16)                                                        | 3152.09(17)                                                        |
| Z                                            | 4                                                                  | 4                                                                  | 4                                                                  |
| ρ <sub>calc</sub> (g cm <sup>-3</sup> )      | 2.298                                                              | 2.295                                                              | 2.292                                                              |
| μ (mm <sup>-1</sup> )                        | 6.491                                                              | 6.481                                                              | 6.472                                                              |
| F(000)                                       | 2004.0                                                             | 2004.0                                                             | 2004.0                                                             |
| Crystal size (mm <sup>3</sup> )              | 0.353 × 0.275 × 0.111                                              | 0.353 × 0.275 × 0.111                                              | 0.353 × 0.275 × 0.111                                              |
| Radiation                                    | Mo Kα (λ = 0.71073)                                                | Mo Kα (λ = 0.71073)                                                | Mo Kα (λ = 0.71073)                                                |
| 2θ range for data collection (°)             | 4.904 to 63.582                                                    | 4.902 to 63.538                                                    | 4.902 to 63.58                                                     |
| Reflections collected                        | 39342                                                              | 39345                                                              | 39364                                                              |
| Independent reflections                      | 8983 R <sub>int</sub> = 0.0605                                     | 8997 R <sub>int</sub> = 0.0597                                     | 8995 R <sub>int</sub> = 0.0589                                     |
| Data/restraints/parameters                   | 8983/6/317                                                         | 8997/6/317                                                         | 8995/6/317                                                         |
| Goodness-of-fit on F <sup>2</sup>            | 1.044                                                              | 1.036                                                              | 1.059                                                              |
| Final R indexes [I >= 2σ (I)]                | R <sub>1</sub> = 0.0373, wR <sub>2</sub> = 0.0812                  | R <sub>1</sub> = 0.0372, wR <sub>2</sub> = 0.0802                  | R <sub>1</sub> = 0.0370, wR <sub>2</sub> = 0.0813                  |
| Final R indexes [all data]                   | R <sub>1</sub> = 0.0558, wR <sub>2</sub> = 0.0880                  | R <sub>1</sub> = 0.0568, wR <sub>2</sub> = 0.0871                  | R <sub>1</sub> = 0.0577, wR <sub>2</sub> = 0.0884                  |
| Largest diff. peak/hole (e Å <sup>-3</sup> ) | 1.17/-1.23                                                         | 0.96/-1.19                                                         | 1.16/-1.26                                                         |

**Table S8.** Crystal data and structural refinement of Cp\*<sub>2</sub>Dy(TIP), **1-Dy**, at 260 K (**1-Dy – 290 K**), and 270 K (**1-Dy – 300 K**). **1-Dy** crystallized with one dichloromethane solvent molecule in the lattice as: Cp\*<sub>2</sub>Dy(TIP)·CH<sub>2</sub>Cl<sub>2</sub>.

| Compound                                                      | <b>1-Dy – 290 K</b>                                                | <b>1-Dy – 300 K</b>                                                |
|---------------------------------------------------------------|--------------------------------------------------------------------|--------------------------------------------------------------------|
| Empirical formula                                             | C <sub>25</sub> H <sub>32</sub> Cl <sub>2</sub> I <sub>4</sub> NDy | C <sub>25</sub> H <sub>32</sub> Cl <sub>2</sub> I <sub>4</sub> NDy |
| CCDC Number                                                   | 2350194                                                            | 2350193                                                            |
| Formula weight (g mol <sup>-1</sup> )                         | 1087.51                                                            | 1087.51                                                            |
| Temperature (K)                                               | 290.0(1)                                                           | 300.0(1)                                                           |
| Crystal system                                                | Monoclinic                                                         | Monoclinic                                                         |
| Space group                                                   | <i>P</i> 2 <sub>1</sub> / <i>c</i>                                 | <i>P</i> 2 <sub>1</sub> / <i>c</i>                                 |
| Unit Cell Dimensions                                          |                                                                    |                                                                    |
| <i>a</i> (Å)                                                  | 10.4118(3)                                                         | 10.4206(3)                                                         |
| <i>b</i> (Å)                                                  | 14.4128(4)                                                         | 14.4229(4)                                                         |
| <i>c</i> (Å)                                                  | 21.5424(7)                                                         | 21.5777(7)                                                         |
| $\alpha$ (°)                                                  | 90                                                                 | 90                                                                 |
| $\beta$ (°)                                                   | 102.244(3)                                                         | 102.327(3)                                                         |
| $\gamma$ (°)                                                  | 90                                                                 | 90                                                                 |
| Volume (Å <sup>3</sup> )                                      | 3159.18(16)                                                        | 3168.25(16)                                                        |
| <i>Z</i>                                                      | 4                                                                  | 4                                                                  |
| $\rho_{\text{calc}}$ (g cm <sup>-3</sup> )                    | 2.286                                                              | 2.280                                                              |
| $\mu$ (mm <sup>-1</sup> )                                     | 6.458                                                              | 6.439                                                              |
| <i>F</i> (000)                                                | 2004.0                                                             | 2004.0                                                             |
| Crystal size (mm <sup>3</sup> )                               | 0.353 × 0.275 × 0.111                                              | 0.353 × 0.275 × 0.111                                              |
| Radiation                                                     | Mo K $\alpha$ ( $\lambda$ = 0.71073)                               | Mo K $\alpha$ ( $\lambda$ = 0.71073)                               |
| 2 $\theta$ range for data collection (°)                      | 4.9 to 63.482                                                      | 4.898 to 63.432                                                    |
| Reflections collected                                         | 39519                                                              | 39450                                                              |
| Independent reflections                                       | 9017 <i>R</i> <sub>int</sub> = 0.0600                              | 9054 <i>R</i> <sub>int</sub> = 0.0641                              |
| Data/restraints/parameters                                    | 9017/6/317                                                         | 9054/6/317                                                         |
| Goodness-of-fit on <i>F</i> <sup>2</sup>                      | 1.040                                                              | 1.050                                                              |
| Final <i>R</i> indexes [ <i>I</i> >= 2 $\sigma$ ( <i>I</i> )] | <i>R</i> <sub>1</sub> = 0.0373, <i>wR</i> <sub>2</sub> = 0.0817    | <i>R</i> <sub>1</sub> = 0.0394, <i>wR</i> <sub>2</sub> = 0.0878    |
| Final <i>R</i> indexes [all data]                             | <i>R</i> <sub>1</sub> = 0.0595, <i>wR</i> <sub>2</sub> = 0.0888    | <i>R</i> <sub>1</sub> = 0.0626, <i>wR</i> <sub>2</sub> = 0.0956    |
| Largest diff. peak/hole (e Å <sup>-3</sup> )                  | 1.02/-1.15                                                         | 1.16/-1.08                                                         |

**Table S9.** Crystal data and structural refinement of Cp\*<sub>2</sub>RE(DMP) (RE = Y (**2–Y**) and Dy (**2–Dy**)).

| Compound                                                     | <b>2–Y</b>                                                      | <b>2–Dy</b>                                                     |
|--------------------------------------------------------------|-----------------------------------------------------------------|-----------------------------------------------------------------|
| Empirical formula                                            | C <sub>26</sub> H <sub>38</sub> NY                              | C <sub>26</sub> H <sub>38</sub> NDy                             |
| CCDC Number                                                  | 2350215                                                         | 2350216                                                         |
| Formula weight (g mol <sup>-1</sup> )                        | 454.504                                                         | 527.07                                                          |
| Temperature (K)                                              | 100.0(2)                                                        | 100.0(2)                                                        |
| Crystal system                                               | Monoclinic                                                      | Monoclinic                                                      |
| Space group                                                  | <i>P</i> 2 <sub>1</sub> / <i>c</i>                              | <i>P</i> 2 <sub>1</sub> / <i>c</i>                              |
| Unit Cell Dimensions                                         |                                                                 |                                                                 |
| <i>a</i> (Å)                                                 | 9.34290(6)                                                      | 9.34360(10)                                                     |
| <i>b</i> (Å)                                                 | 15.24462(11)                                                    | 15.2429(2)                                                      |
| <i>c</i> (Å)                                                 | 16.36886(11)                                                    | 16.38150(10)                                                    |
| $\alpha$ (°)                                                 | 90                                                              | 90                                                              |
| $\beta$ (°)                                                  | 98.4832(6)                                                      | 98.5100(10)                                                     |
| $\gamma$ (°)                                                 | 90                                                              | 90                                                              |
| Volume (Å <sup>3</sup> )                                     | 2305.89(3)                                                      | 2307.42(4)                                                      |
| <i>Z</i>                                                     | 4                                                               | 4                                                               |
| $\rho_{\text{calc}}$ (g cm <sup>-3</sup> )                   | 1.309                                                           | 1.517                                                           |
| $\mu$ (mm <sup>-1</sup> )                                    | 3.651                                                           | 17.376                                                          |
| <i>F</i> (000)                                               | 961.2                                                           | 1068.0                                                          |
| Crystal size (mm <sup>3</sup> )                              | 0.524 × 0.329 × 0.196                                           | 0.283 × 0.174 × 0.138                                           |
| Radiation                                                    | Cu K $\alpha$ ( $\lambda$ = 1.54184)                            | Cu K $\alpha$ ( $\lambda$ = 1.54184)                            |
| 2 $\theta$ range for data collection (°)                     | 7.96 to 160.44                                                  | 7.964 to 160.548                                                |
| Reflections collected                                        | 19243                                                           | 25149                                                           |
| Independent reflections                                      | 4941 <i>R</i> <sub>int</sub> = 0.0338                           | 4967 <i>R</i> <sub>int</sub> = 0.0465                           |
| Data/restraints/parameters                                   | 4941/0/266                                                      | 4967/0/265                                                      |
| Goodness-of-fit on <i>F</i> <sup>2</sup>                     | 1.025                                                           | 1.073                                                           |
| Final <i>R</i> indexes [ <i>I</i> > 2 $\sigma$ ( <i>I</i> )] | <i>R</i> <sub>1</sub> = 0.0257, <i>wR</i> <sub>2</sub> = 0.0673 | <i>R</i> <sub>1</sub> = 0.0306, <i>wR</i> <sub>2</sub> = 0.0829 |
| Final <i>R</i> indexes [all data]                            | <i>R</i> <sub>1</sub> = 0.0276, <i>wR</i> <sub>2</sub> = 0.0686 | <i>R</i> <sub>1</sub> = 0.0337, <i>wR</i> <sub>2</sub> = 0.0849 |
| Largest diff. peak/hole (e Å <sup>-3</sup> )                 | 0.48/-0.36                                                      | 1.89/-1.07                                                      |

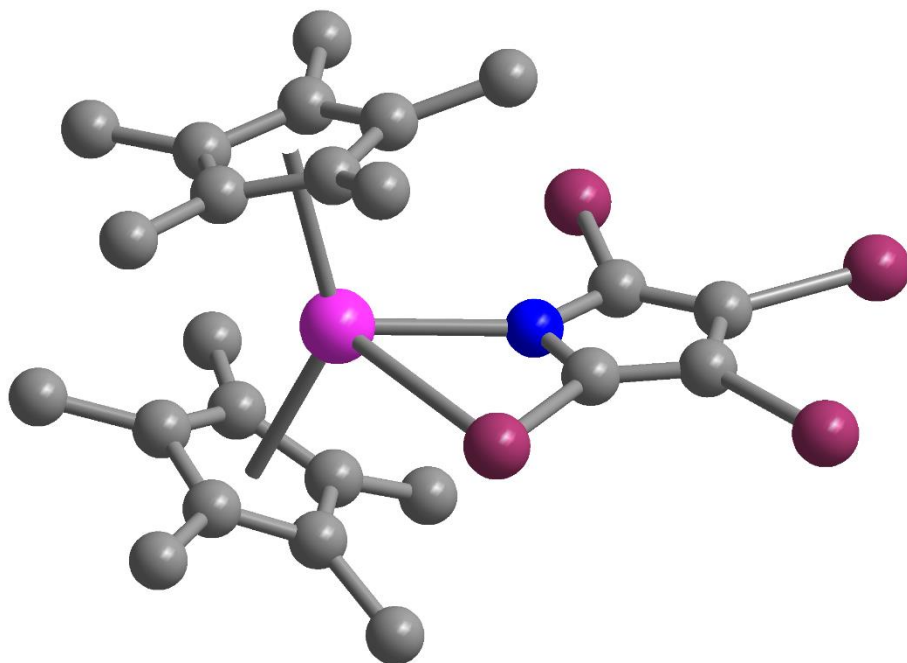

**Figure S1.** Structure of  $\text{Cp}^*_2\text{Y}(\text{TIP})$ , **1-Y**, in a crystal of  $\text{Cp}^*_2\text{Y}(\text{TIP})\cdot\text{CH}_2\text{Cl}_2$ . Pink, purple, blue, and grey spheres represent Y, I, N, and C atoms, respectively. Hydrogen atoms and co-crystallized dichloromethane have been omitted for clarity.

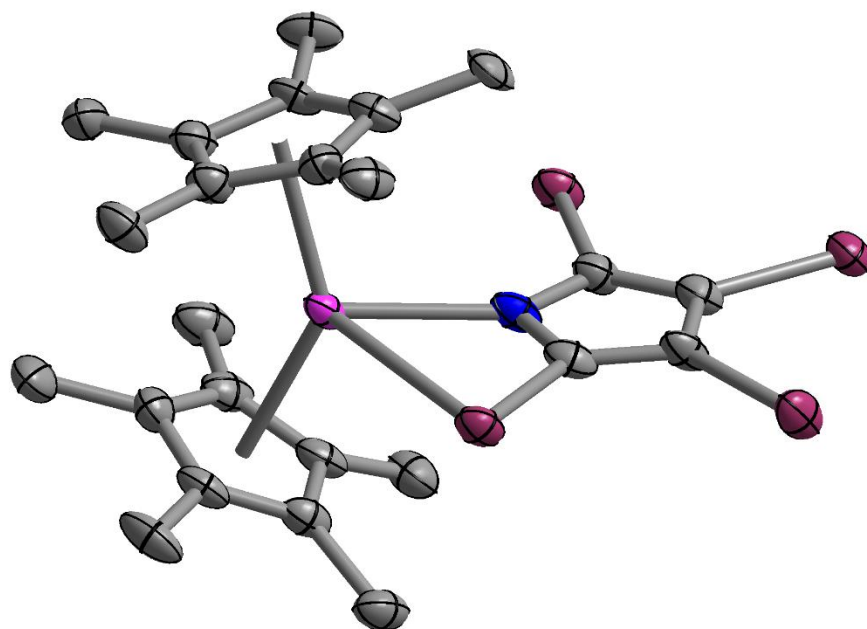

**Figure S2.** Structure of  $\text{Cp}^*_2\text{Y}(\text{TIP})$ , **1-Y**, with thermal ellipsoids drawn at 50%, in a crystal of  $\text{Cp}^*_2\text{Y}(\text{TIP})\cdot\text{CH}_2\text{Cl}_2$ . Pink, purple, blue, and grey spheres represent Y, I, N, and C atoms, respectively. Hydrogen atoms and co-crystallized dichloromethane have been omitted for clarity.



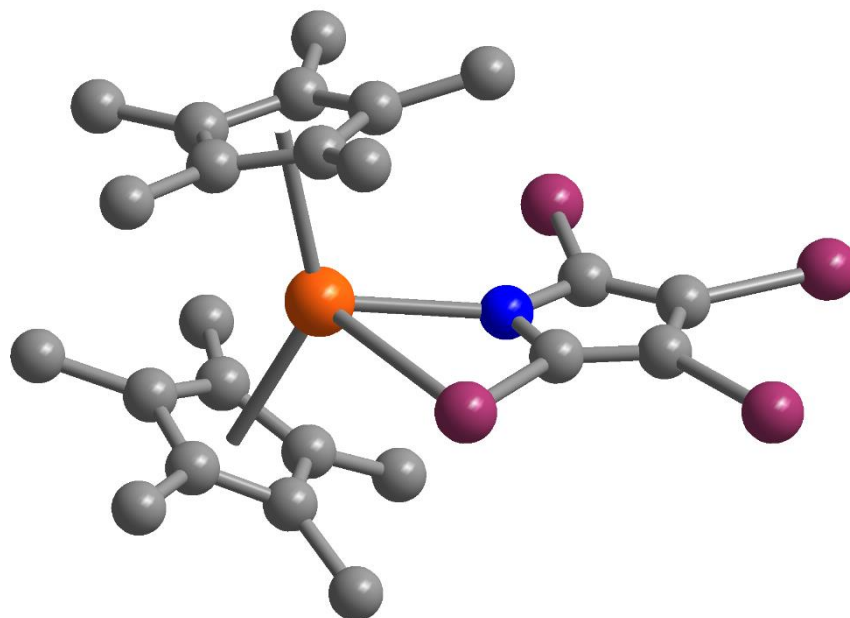

**Figure S3.** Structure of  $\text{Cp}^*_2\text{Gd}(\text{TIP})$ , **1-Gd**, in a crystal of  $\text{Cp}^*_2\text{Gd}(\text{TIP})\cdot\text{CH}_2\text{Cl}_2$ . Orange, purple, blue, and grey spheres represent Gd, I, N, and C atoms, respectively. Hydrogen atoms and co-crystallized dichloromethane have been omitted for clarity.

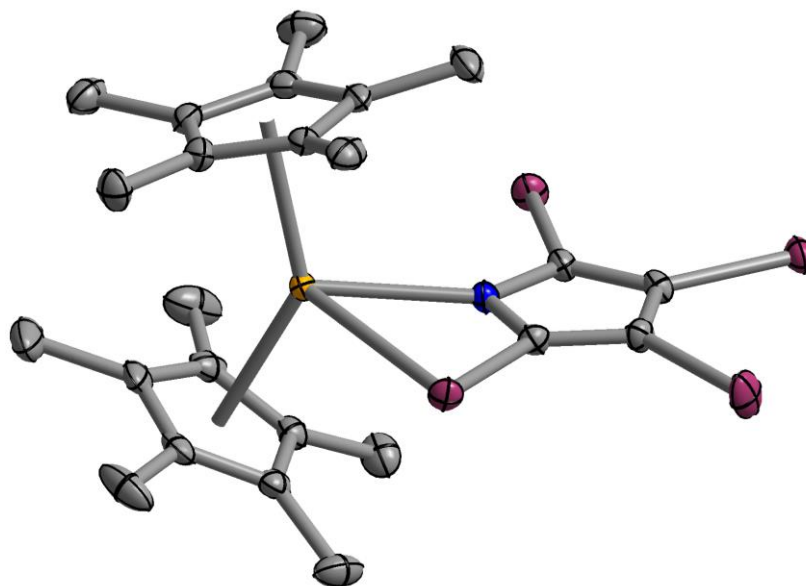

**Figure S4.** Structure of  $\text{Cp}^*_2\text{Gd}(\text{TIP})$ , **1-Gd**, with thermal ellipsoids drawn at 50%, in a crystal of  $\text{Cp}^*_2\text{Gd}(\text{TIP})\cdot\text{CH}_2\text{Cl}_2$ . Orange, purple, blue, and grey ellipsoids represent Gd, I, N, and C atoms, respectively. Hydrogen atoms and co-crystallized dichloromethane have been omitted for clarity.

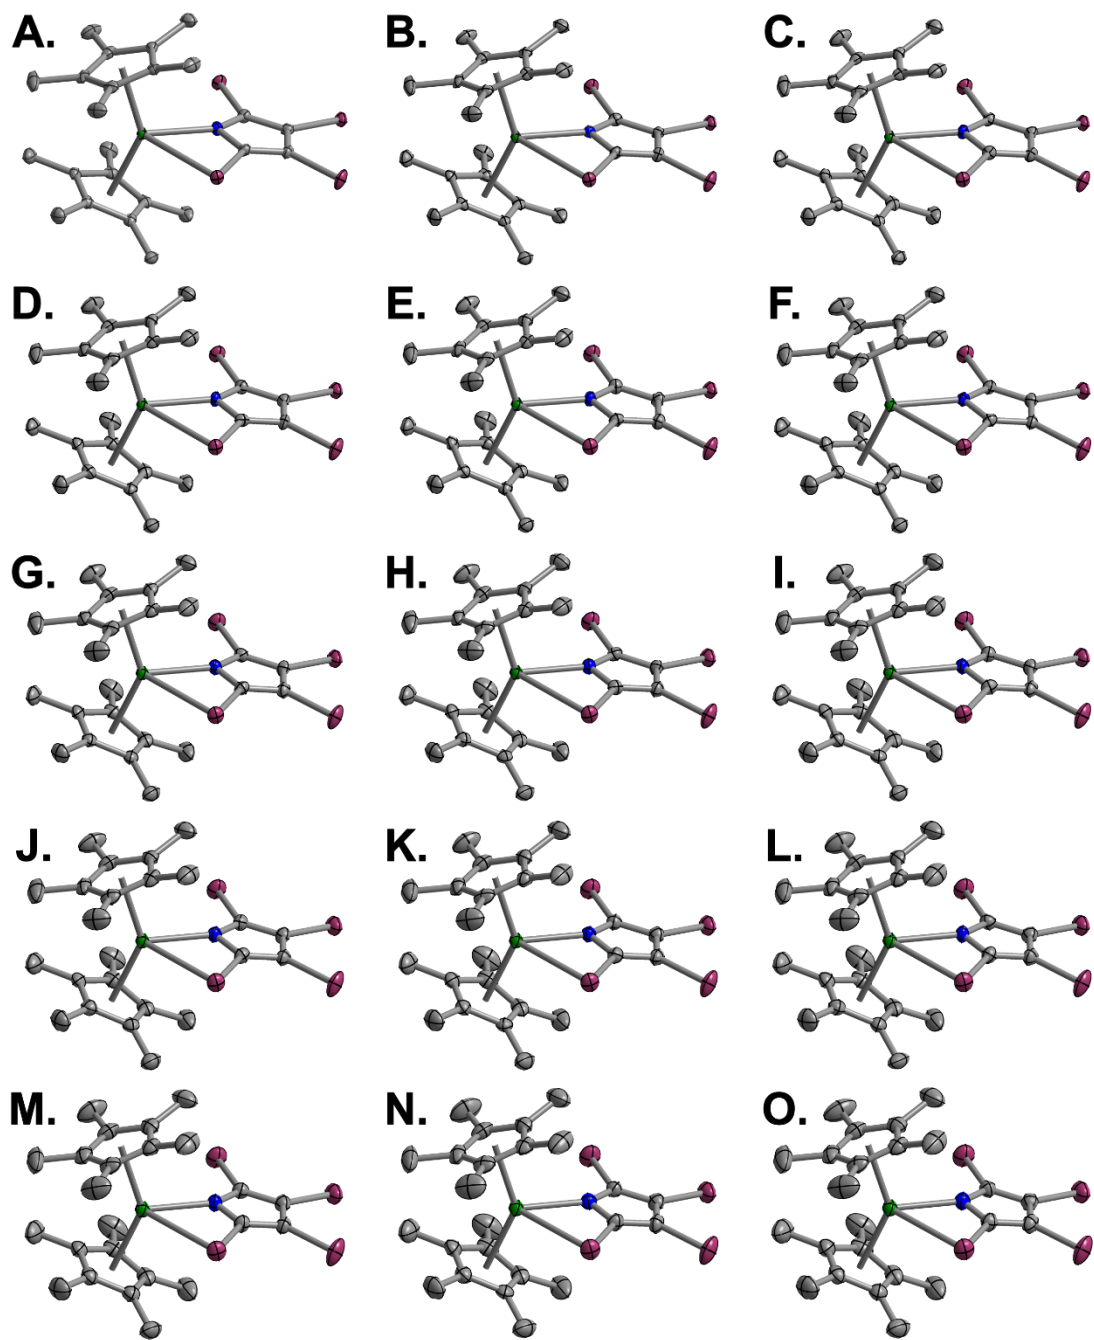

**Figure S5.** Structure of  $\text{Cp}^*_2\text{Dy}(\text{TIP})$ , **1-Dy**, at 100 K (A), 110 K (B), 120 K (C), 130 K (D), 140 K (E), 150 K (F), 160 K (G), 170 K (F), 180 K (G), 190 K (H), 200 K (I), 210 K (J), 220 K (K), 230 K (L), 240 K (M), 250 K (N), and 260 K (O) with thermal ellipsoids drawn at 50%. Green, purple, blue, and grey ellipsoids represent Dy, I, N, and C atoms, respectively. Hydrogen atoms and co-crystallized dichloromethane have been omitted for clarity.

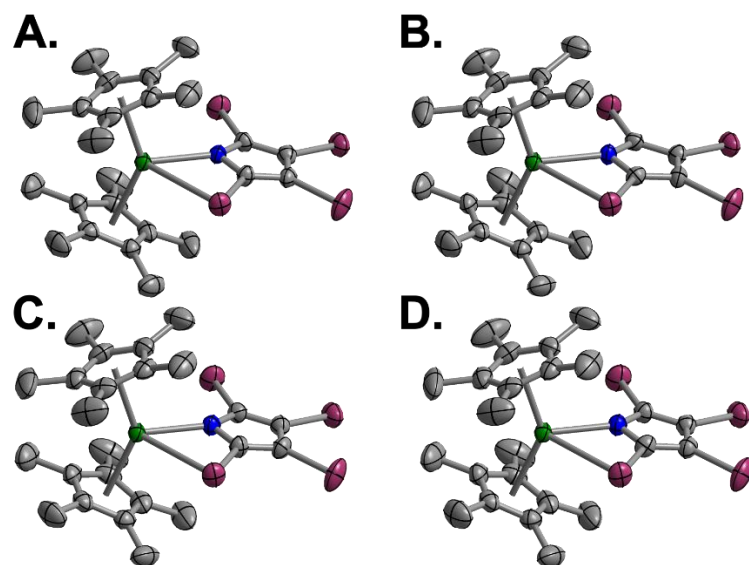

**Figure S6.** Structure of  $\text{Cp}^*_2\text{Dy}(\text{TIP})$ , **1-Dy**, at 270 K (A), 280 K (B), 290 K (C), and 300 K (D) with thermal ellipsoids drawn at 50%. Green, purple, blue, and grey ellipsoids represent Dy, I, N, and C atoms, respectively. Hydrogen atoms and co-crystallized dichloromethane have been omitted for clarity.

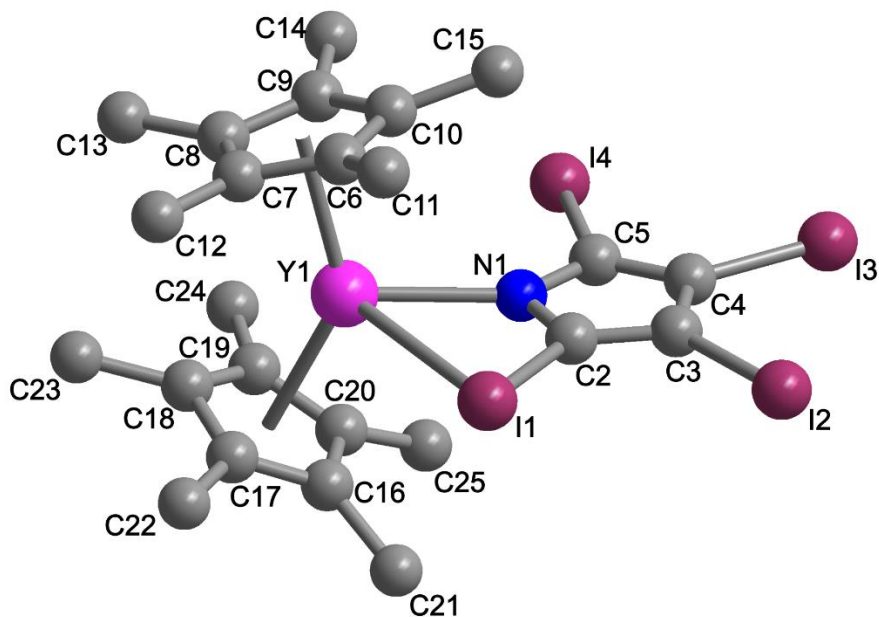

**Figure S7.** Structure of  $\text{Cp}^*_2\text{Y}(\text{TIP})$ , **1-Y**, in a crystal of  $\text{Cp}^*_2\text{Y}(\text{TIP})\cdot\text{CH}_2\text{Cl}_2$ . Pink, purple, blue, and grey spheres represent Y, I, N, and C atoms, respectively. Hydrogen atoms and co-crystallized dichloromethane have been omitted for clarity. Atoms have been labeled for reference (See main text).

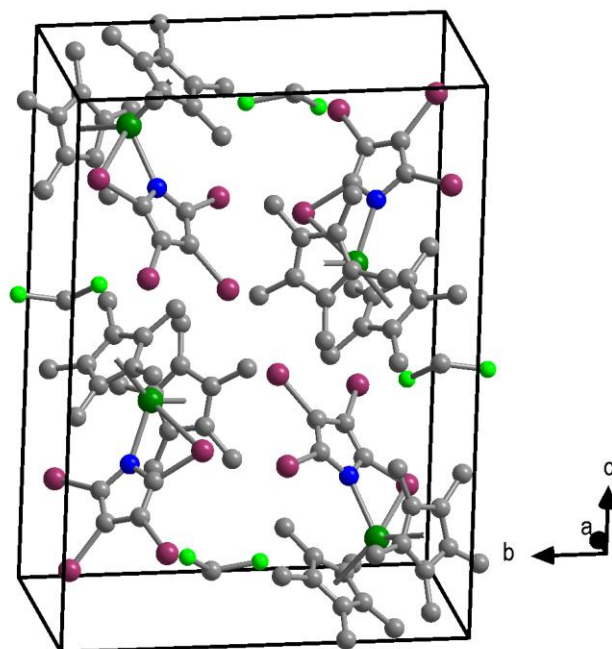

**Figure S8.** Unit cell of  $\text{Cp}^*_2\text{Dy}(\text{TIP})$ , **1-Dy**. Green, light green, purple, blue, and grey spheres represent Dy, Cl, I, N, and C atoms, respectively. Hydrogen atoms have been omitted for clarity.

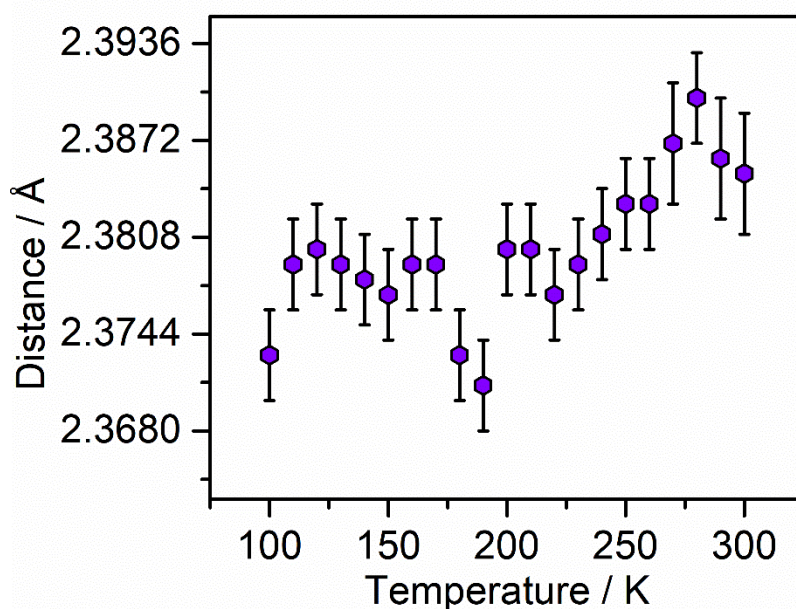

**Figure S9.** Plot of the temperature dependence of the Dy–N interatomic distance of  $\text{Cp}^*_2\text{Dy}(\text{TIP})$ , **1-Dy**.

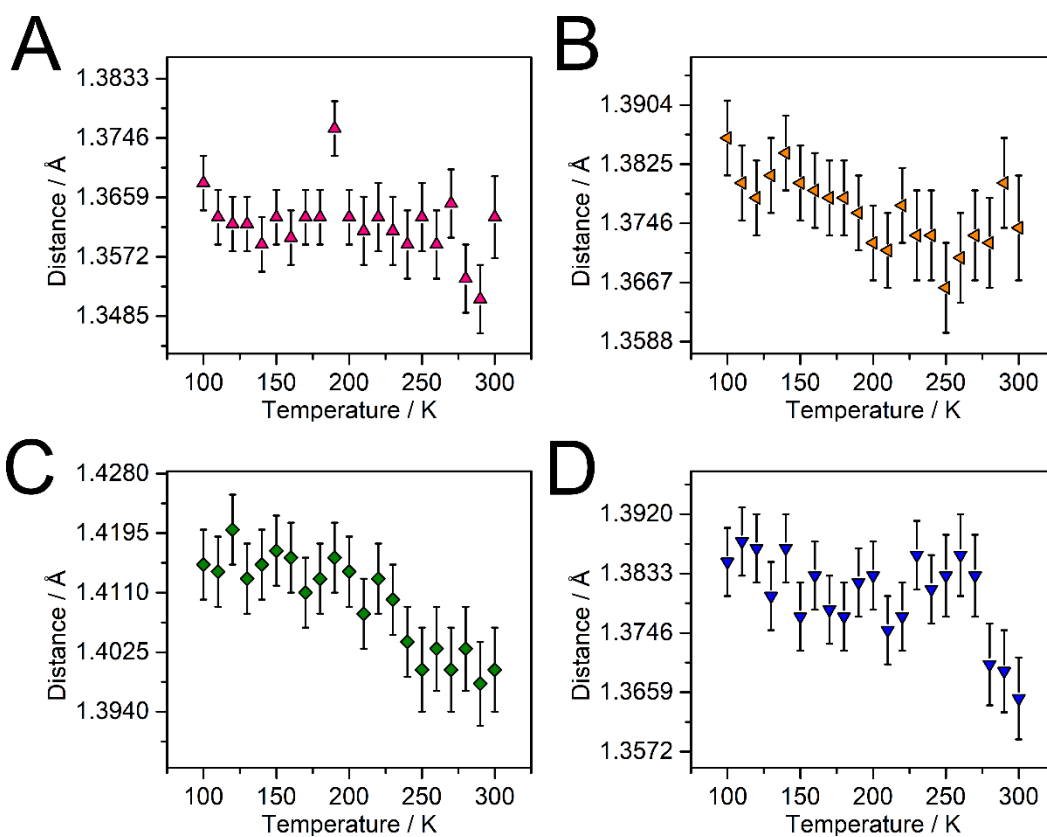

**Figure S10.** Plots of the temperature dependence of the N<sup>1</sup>-C<sup>2</sup>, C<sup>2</sup>-C<sup>3</sup>, C<sup>3</sup>-C<sup>4</sup>, and C<sup>4</sup>-C<sup>5</sup> interatomic distances of Cp\*<sub>2</sub>Dy(TIP), **1-Dy**. See Figure S7 for the relevant atom labels.

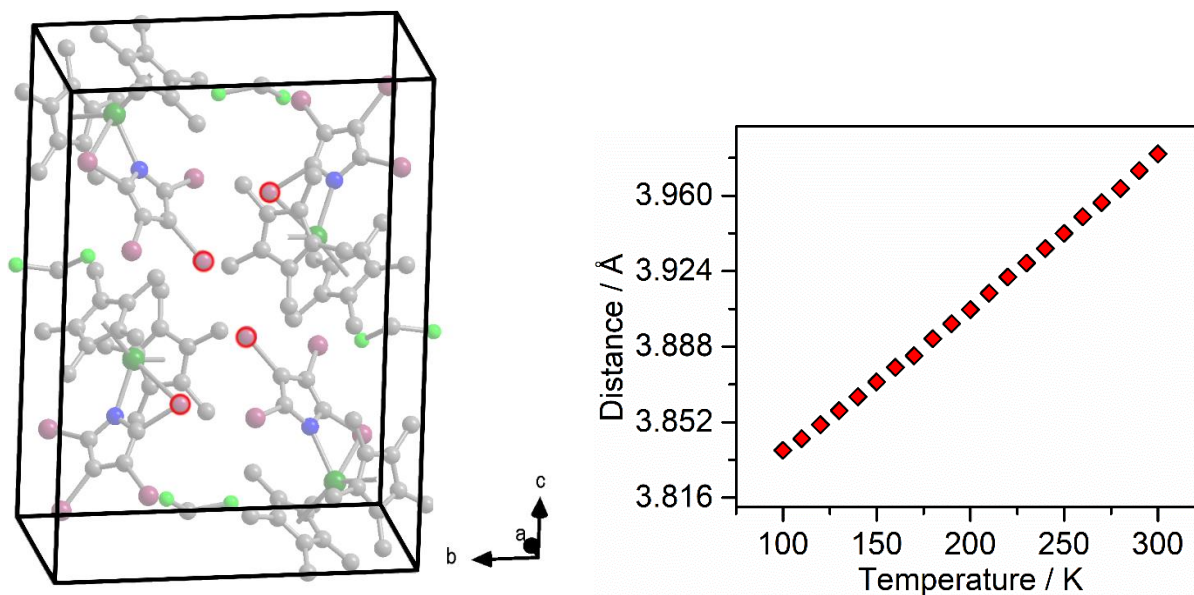

**Figure S11.** Right, plot of the temperature dependence of the intermolecular I<sup>1</sup>-I<sup>3</sup> distances of Cp\*<sub>2</sub>Dy(TIP), **1-Dy**. The relevant atoms are outlined in red in the left unit cell depiction. Error bars are within the radius of the symbols. See Figure S7 for the relevant atom labels.



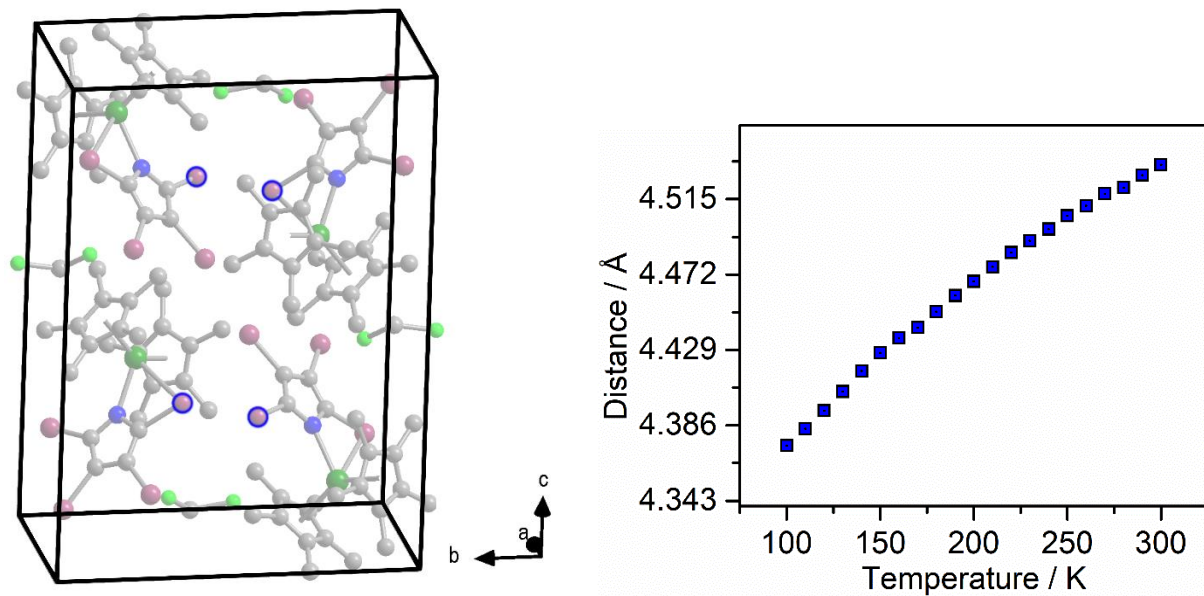

**Figure S12.** Right, plot of the temperature dependence of the intermolecular I<sup>1</sup>–I<sup>4</sup> distances of Cp\*<sub>2</sub>Dy(TIP), **1–Dy**. The relevant atoms are outlined in blue in the left unit cell depiction. Error bars are within the radius of the symbols. See Figure S7 for the relevant atom labels.

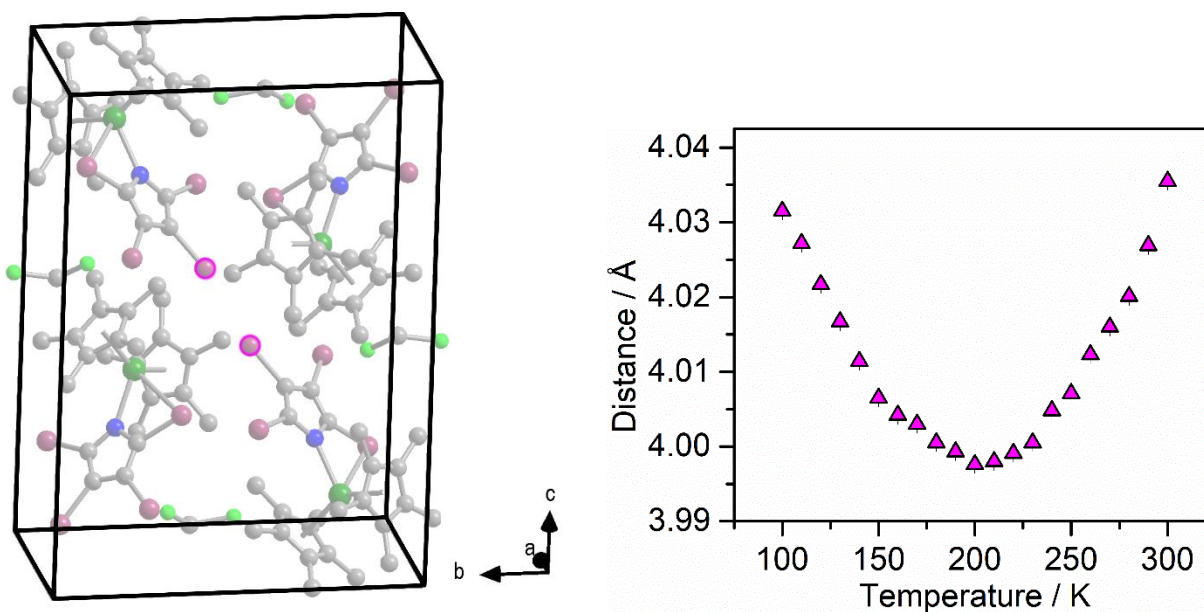

**Figure S13.** Right, plot of the temperature dependence of the intermolecular I<sup>3</sup>–I<sup>3</sup> distances of Cp\*<sub>2</sub>Dy(TIP), **1–Dy**. The relevant atoms are outlined in pink in the left unit cell depiction. Error bars are within the radius of the symbols. See Figure S7 for the relevant atom labels.

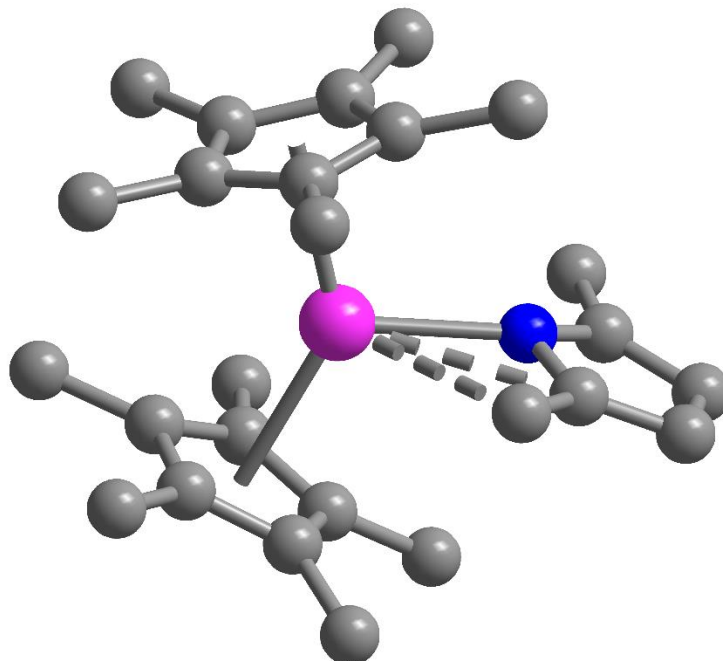

**Figure S14.** Structure of Cp\*<sub>2</sub>Y(DMP), 2-Y. Pink, blue, and grey spheres represent Y, N, and C atoms, respectively. Hydrogen atoms have been omitted for clarity.

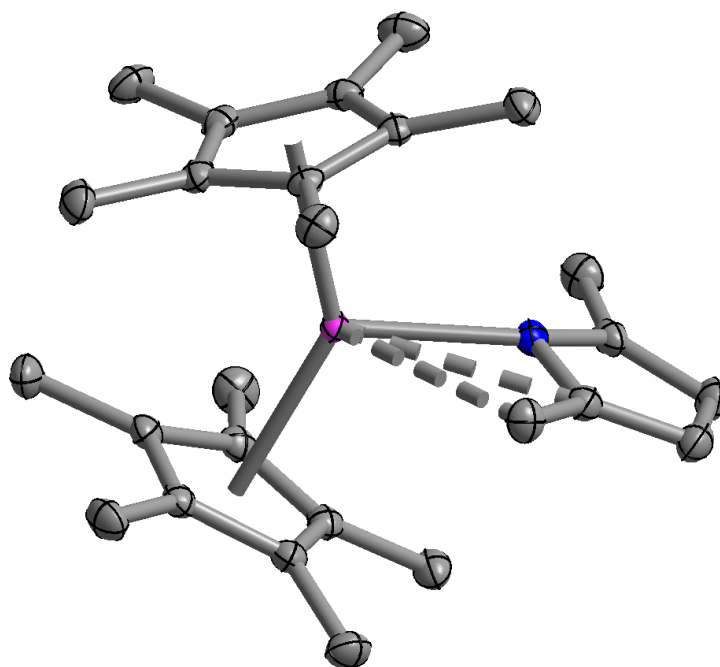

**Figure S15.** Structure of Cp\*<sub>2</sub>Y(DMP), 2-Y, with thermal ellipsoids drawn at 50%. Pink, blue, and grey spheres represent Y, N, and C atoms, respectively. Hydrogen atoms have been omitted for clarity.

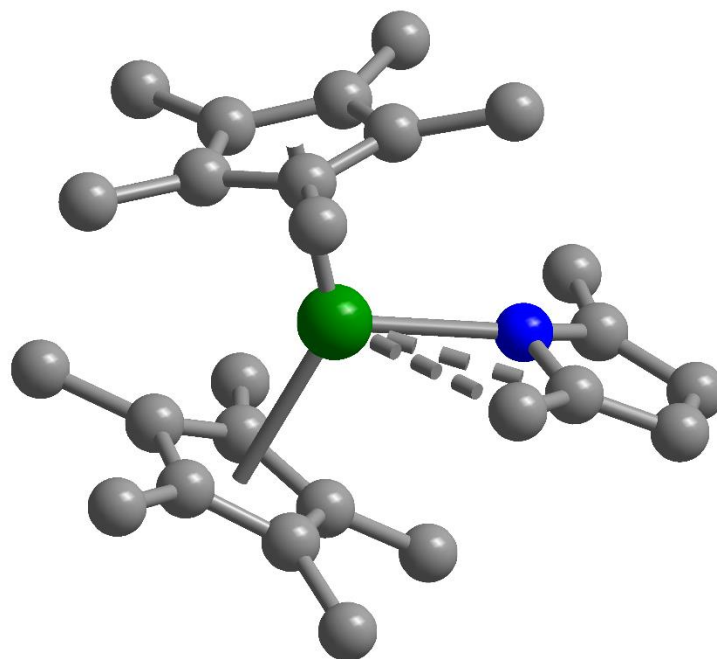

**Figure S16.** Structure of  $\text{Cp}^*_2\text{Dy}(\text{DMP})$ , **2-Dy**. Green, blue, and grey spheres represent Dy, N, and C atoms, respectively. Hydrogen atoms have been omitted for clarity.

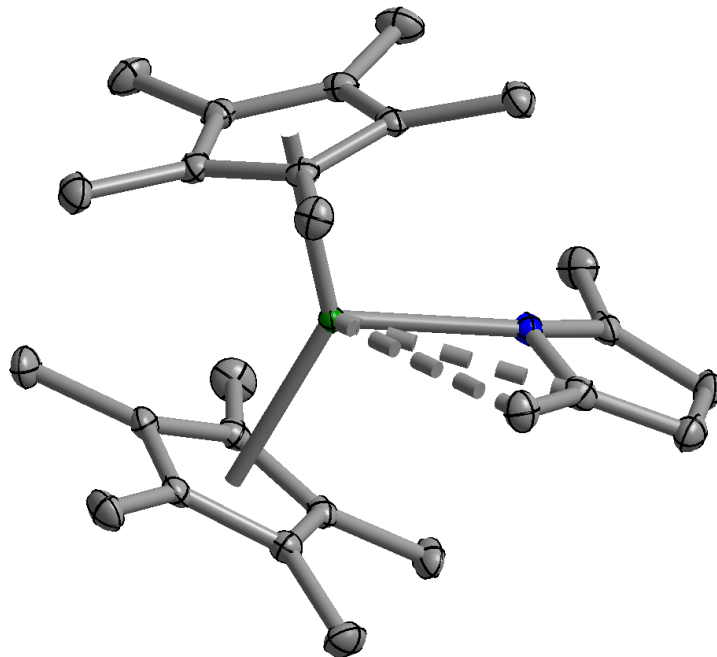

**Figure S17.** Structure of  $\text{Cp}^*_2\text{Dy}(\text{DMP})$ , **2-Dy**, with thermal ellipsoids drawn at 50%. Green, blue, and grey spheres represent Dy, N, and C atoms, respectively. Hydrogen atoms have been omitted for clarity.



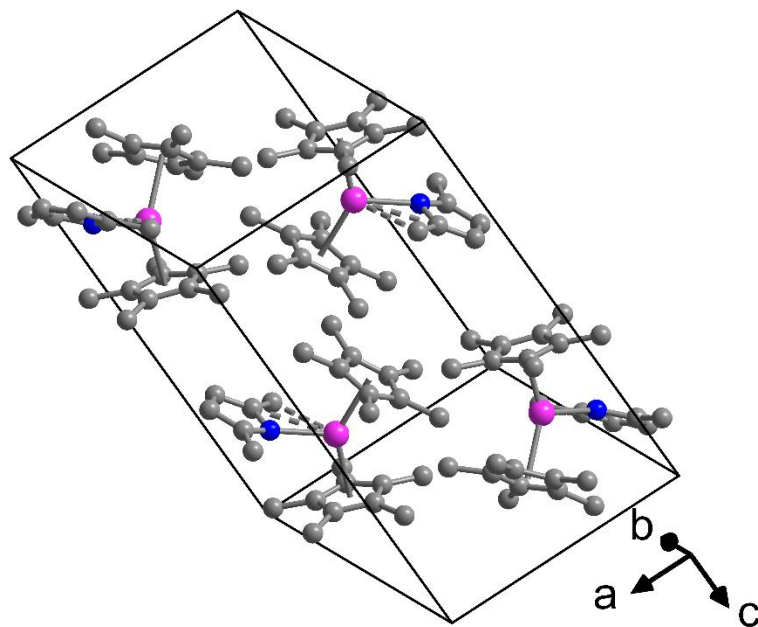

**Figure S18.** Unit cell of  $\text{Cp}^*_2\text{Y}(\text{DMP})$ , 2-Y. Pink, blue, and grey spheres represent Y, N, and C atoms, respectively. Hydrogen atoms have been omitted for clarity.

## NMR Spectroscopy

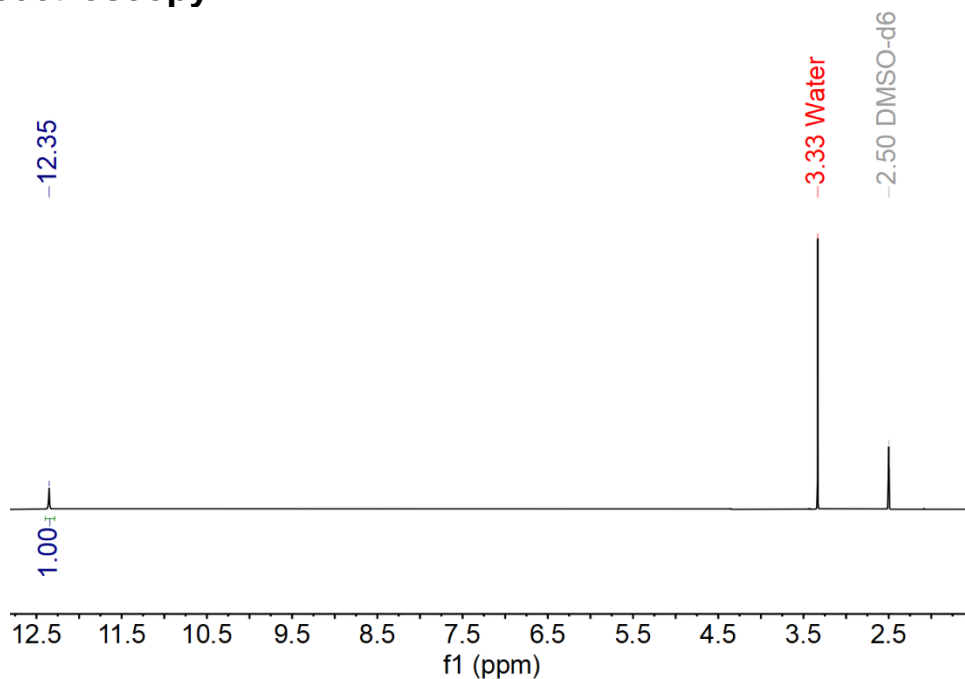

**Figure S19.**  $^1\text{H}$  NMR spectrum of TIPH (500 MHz, ppm, DMSO- $d_6$ , 25 °C):  $\delta$  12.35 (s, 1 H,  $\text{HNC}_4\text{I}_4$ ).

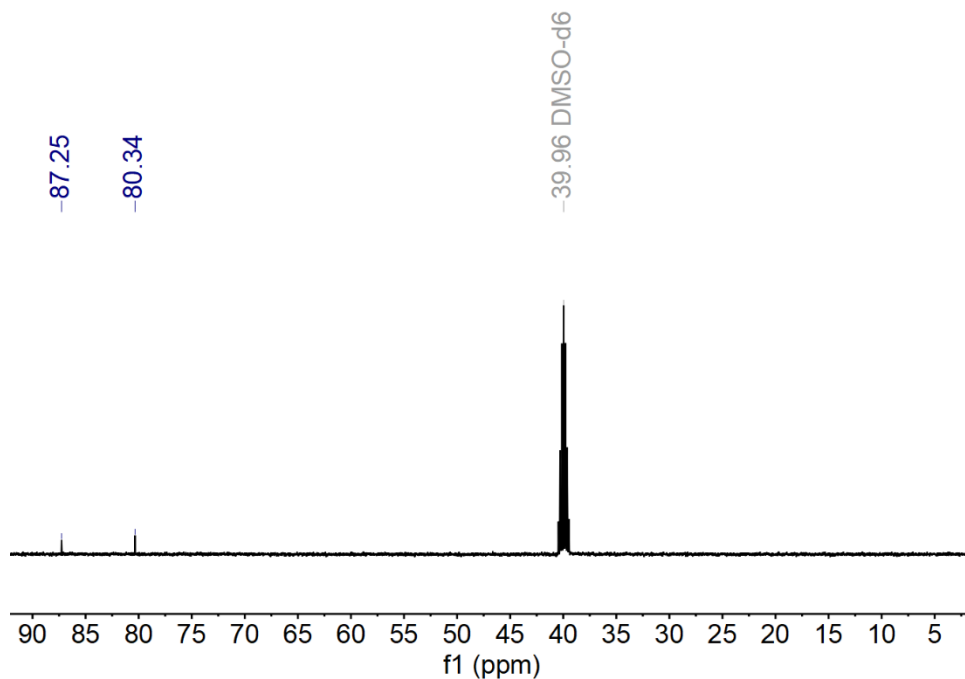

**Figure S20.**  $^{13}\text{C}$  NMR spectrum of TIPH (126 MHz, ppm, DMSO- $d_6$ , 25 °C):  $\delta$  87.25 ( $\text{NC}_4\text{H}_4$ ), 80.34 ( $\text{NC}_4\text{H}_4$ ).

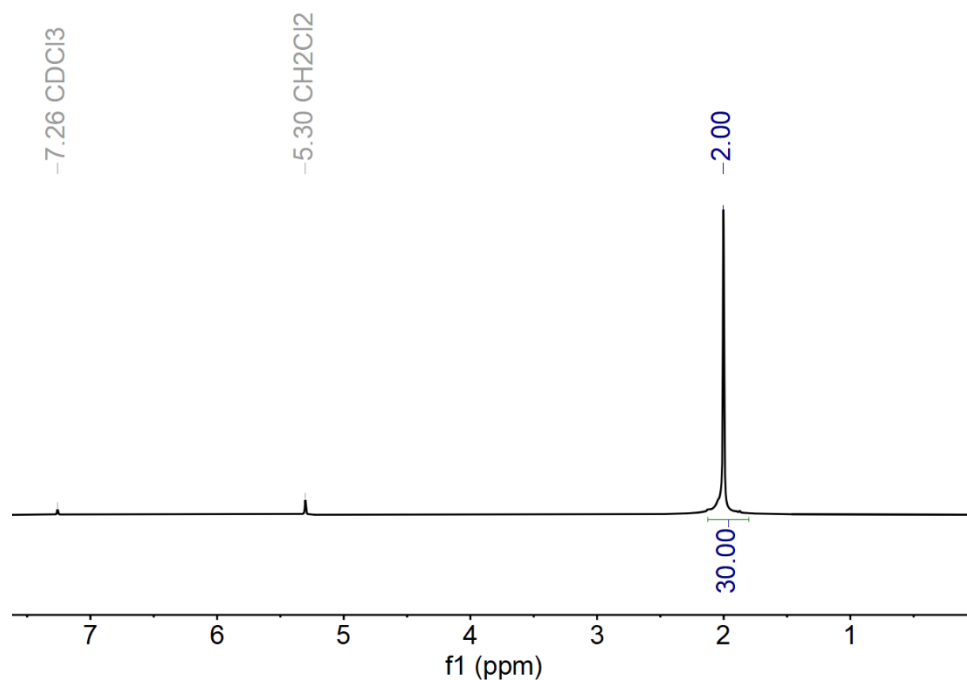

**Figure S21.**  $^1\text{H}$  NMR spectrum of  $\text{Cp}^*_2\text{Y}(\text{TIP})$ , **1-Y**, (500 MHz, ppm, chloroform-*d*, 25 °C):  $\delta$  2.00 (s, 30 H,  $\text{C}_5\text{Me}_5$ ).

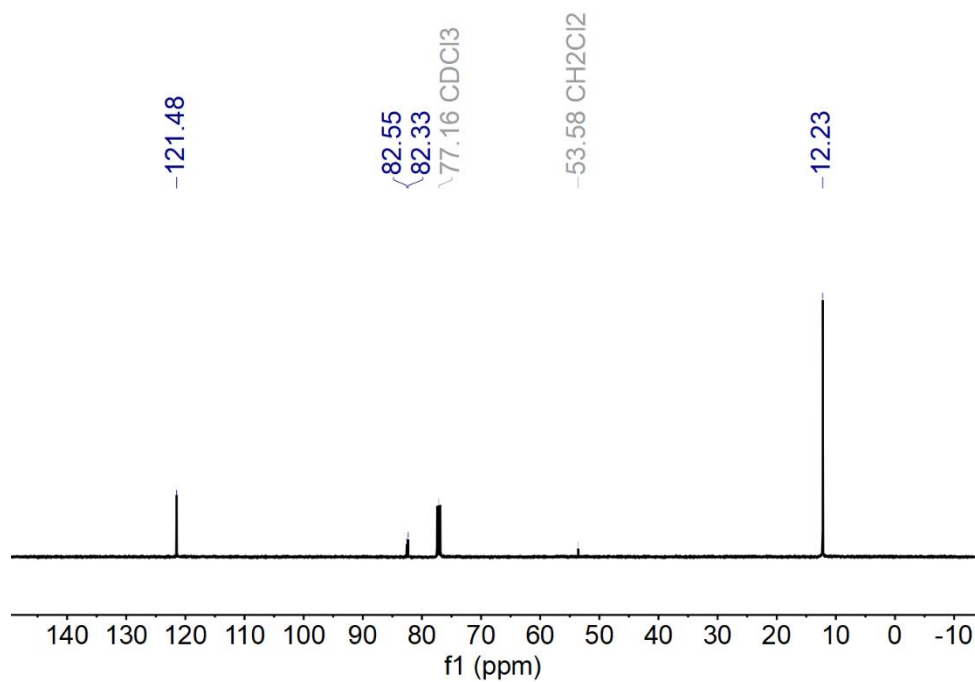

**Figure S22.**  $^{13}\text{C}$  NMR spectrum of  $\text{Cp}^*_2\text{Y}(\text{TIP})$ , **1-Y**, (126 MHz, ppm, chloroform-*d*, 25 °C):  $\delta$  121.48, ( $\text{C}_5\text{Me}_5$ ), 82.55, 82.33 (TIP), 12.23 ( $\text{C}_5\text{Me}_5$ ).

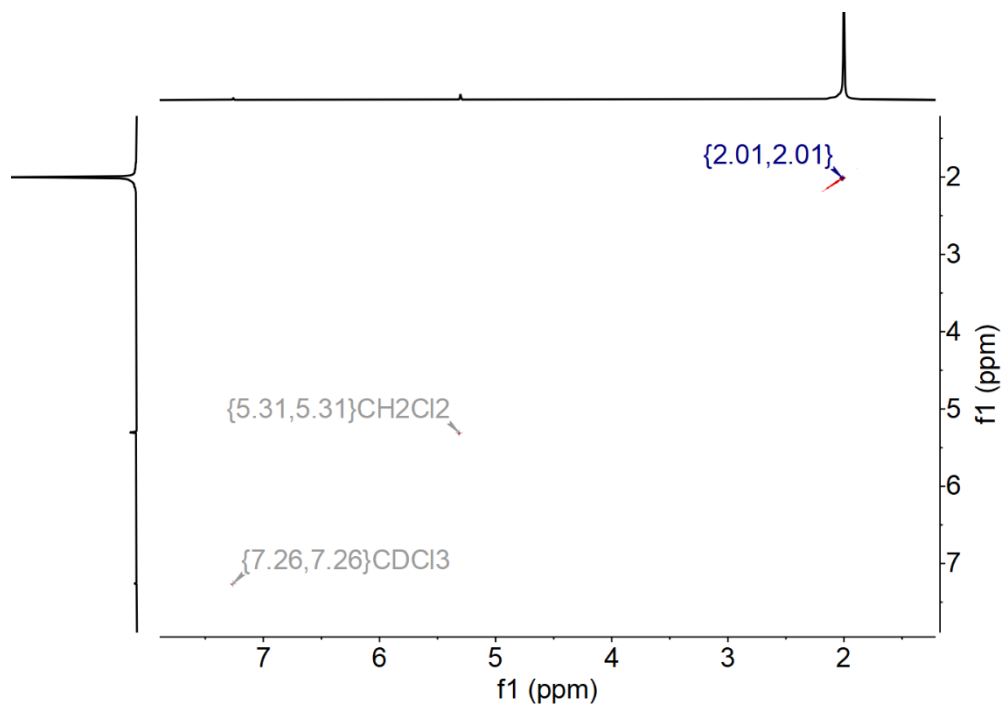

**Figure S23.**  $^1\text{H}$ - $^1\text{H}$  gCOSY spectrum of  $\text{Cp}^*_2\text{Y}(\text{TIP})$ , **1-Y**, (500 MHz, ppm, chloroform- $d$ , 25 °C).

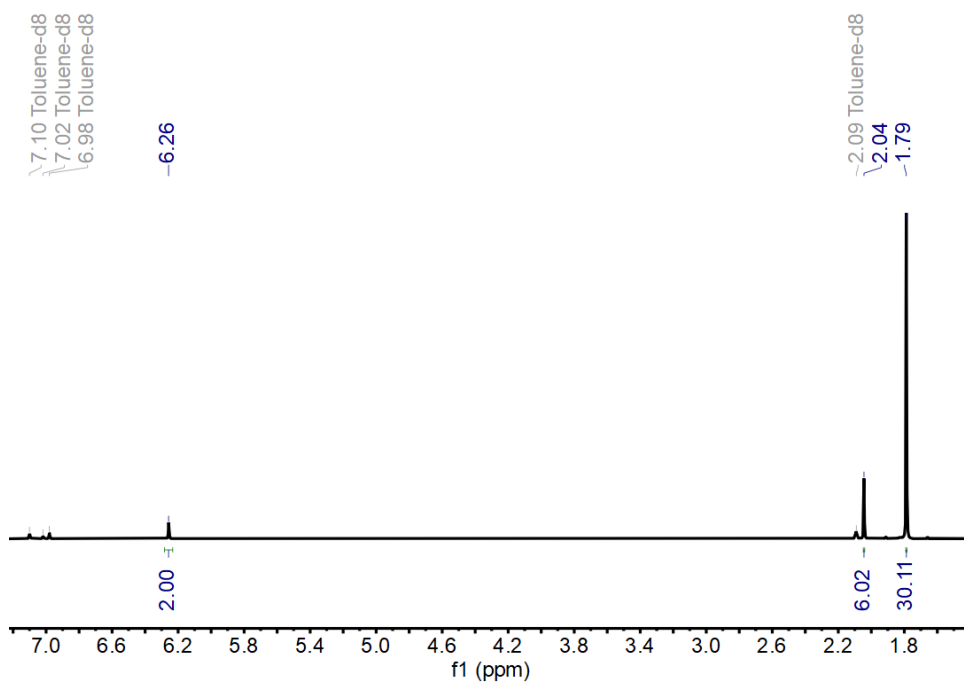

**Figure S24.**  $^1\text{H}$  NMR spectrum of  $\text{Cp}^*_2\text{Y}(\text{DMP})$ , **2-Y**, (500 MHz, ppm, toluene- $d_8$ , 25 °C):  $\delta$  1.79 (s, 30 H,  $\text{C}_5\text{Me}_5$ ), 2.04 (s, 6 H,  $\text{NC}_4\text{Me}_2\text{H}_2$ ), 6.26 (s, 2 H,  $\text{NC}_4\text{Me}_2\text{H}_2$ ).

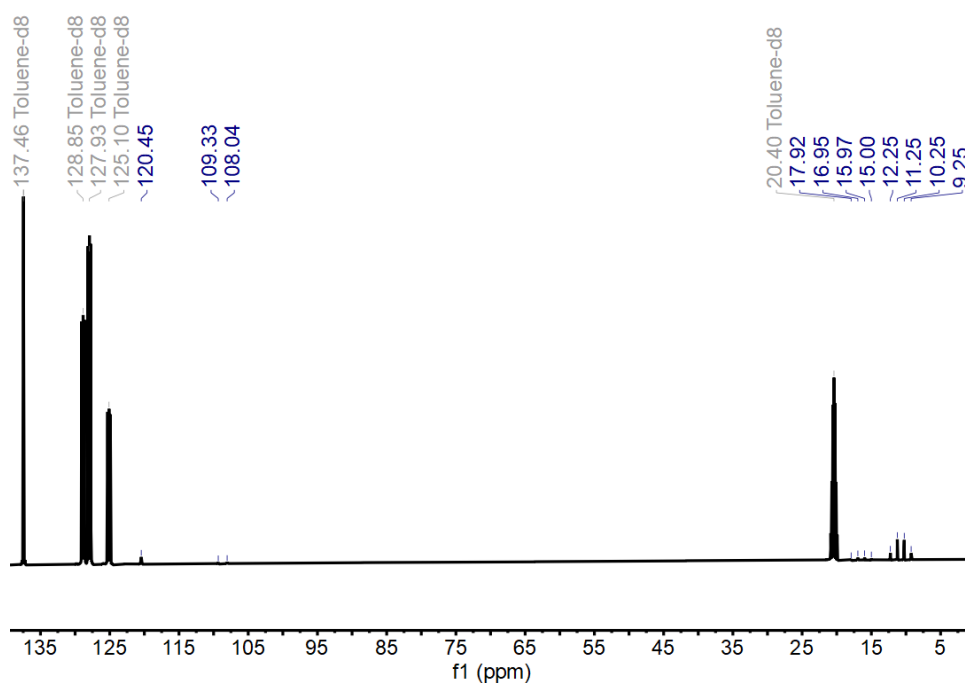

**Figure S25.**  $^{13}\text{C}\{^1\text{H}\}$  NMR spectrum of  $\text{Cp}^*_2\text{Y}(\text{DMP})$ , **2-Y**, (126 MHz, ppm, toluene- $d_8$ , 25 °C):  $\delta$  120.45, ( $\text{C}_5\text{Me}_5$ ), 109.33 ( $\text{NC}_4\text{Me}_2\text{H}_2$ ), 108.04 ( $\text{NC}_4\text{Me}_2\text{H}_2$ ), 15.00 – 17.92 (q,  $^1J_{\text{C-H}}$ : 121.90 Hz,  $\text{NC}_4\text{Me}_2\text{H}_2$ ), 9.25 – 12.24 (q,  $^1J_{\text{C-H}}$ : 125.83 Hz,  $\text{C}_5\text{Me}_5$ ).

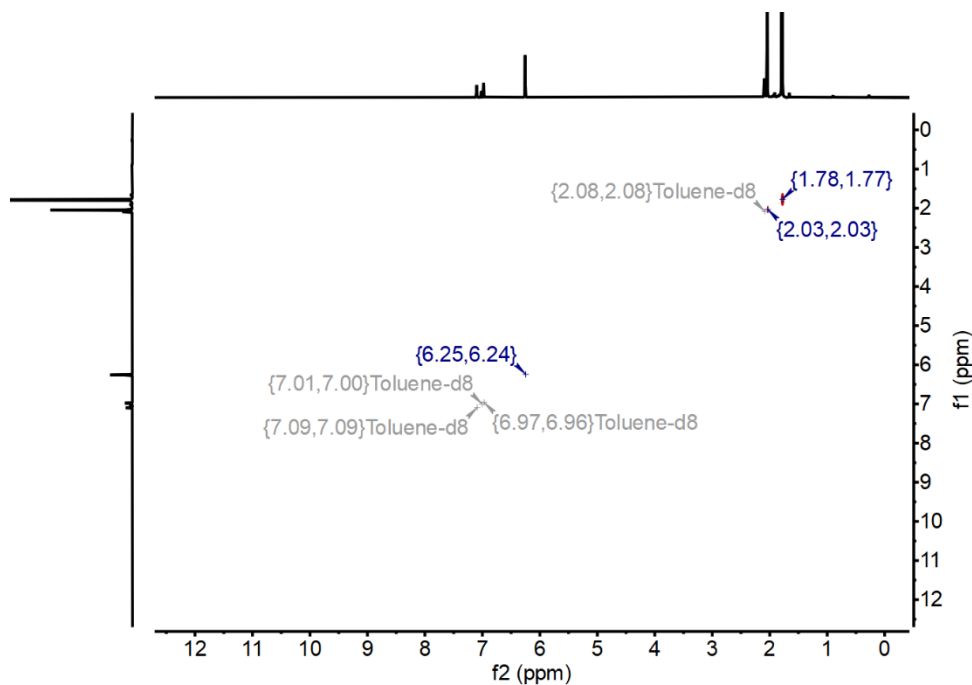

**Figure S26.**  $^1\text{H}-^1\text{H}$  gCOSY spectrum of  $\text{Cp}^*_2\text{Y}(\text{DMP})$ , **2-Y**. (500 MHz, ppm, toluene- $d_8$ , 25 °C).

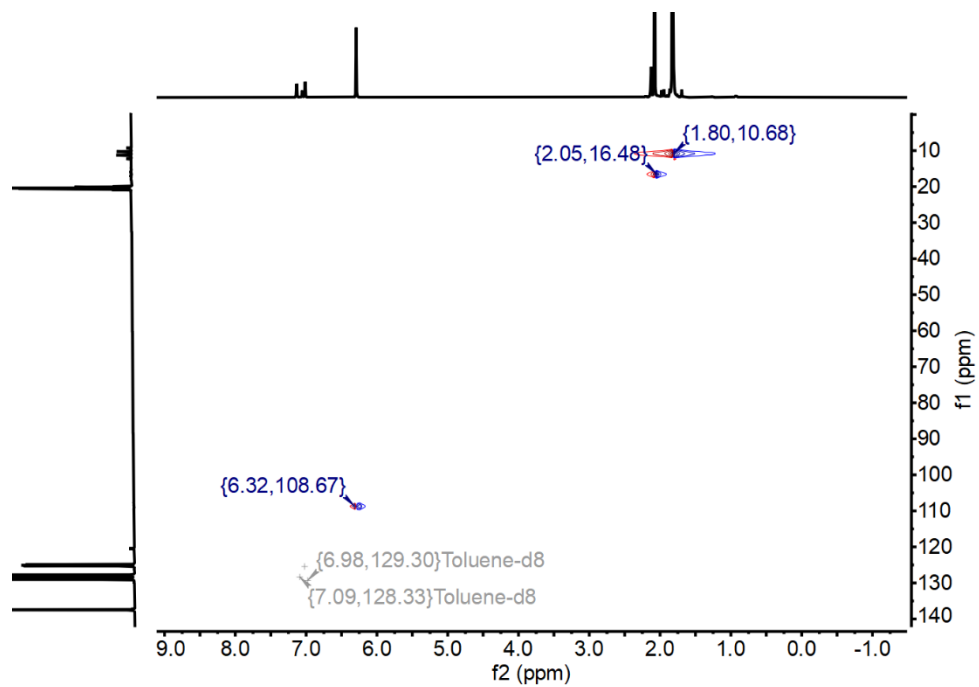

**Figure S27.**  $^1\text{H}$ - $^{13}\text{C}$  gHSQC spectrum of  $\text{Cp}^*_2\text{Y}(\text{DMP})$ , **2-Y**, (500 MHz, ppm, toluene- $d_8$ , 25  $^\circ\text{C}$ ).

## IR Spectroscopy

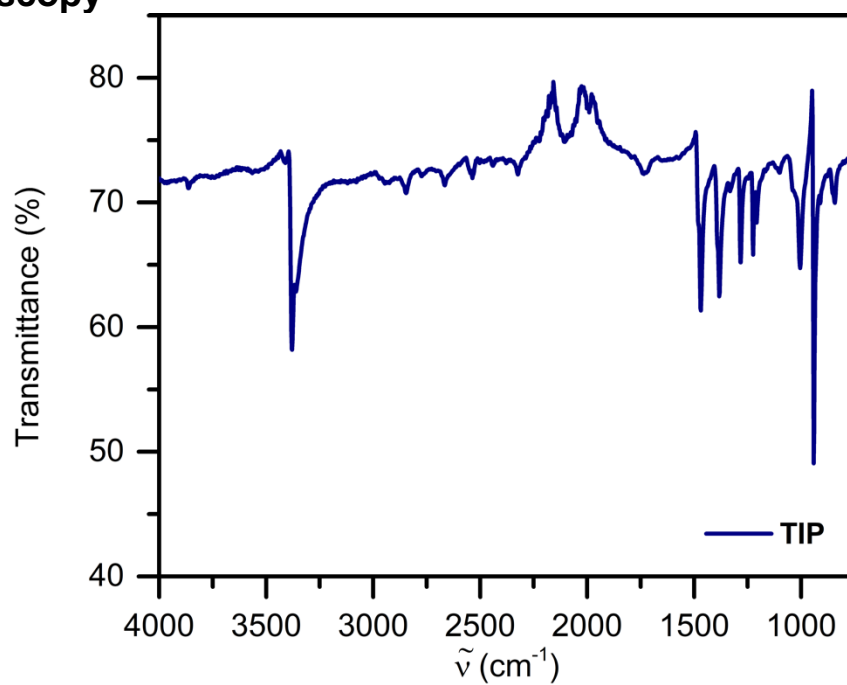

**Figure S28.** FTIR spectrum of tetraiodopyrrole.

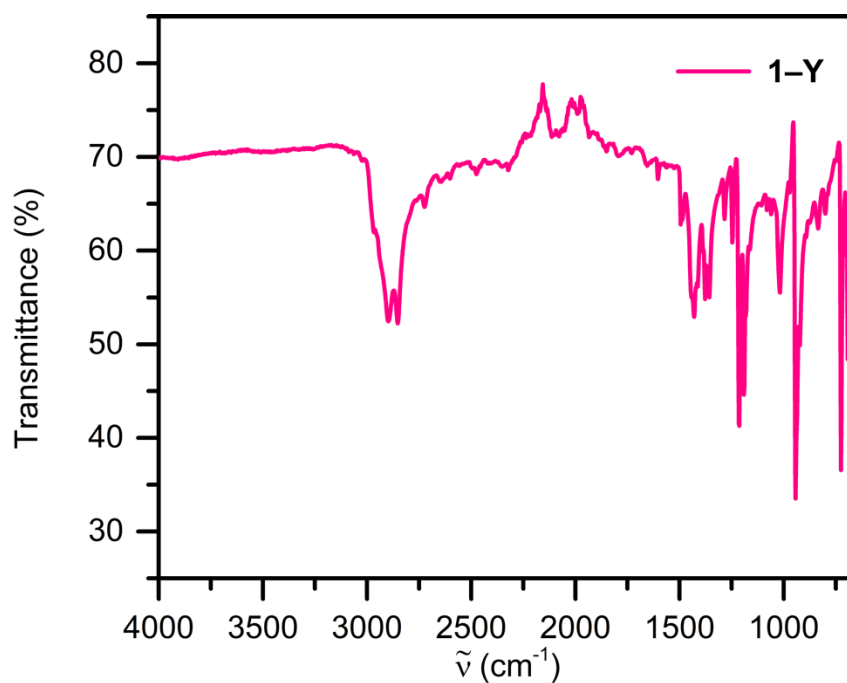

**Figure S29.** FTIR spectrum of Cp\*<sub>2</sub>Y(TIP), 1-Y.

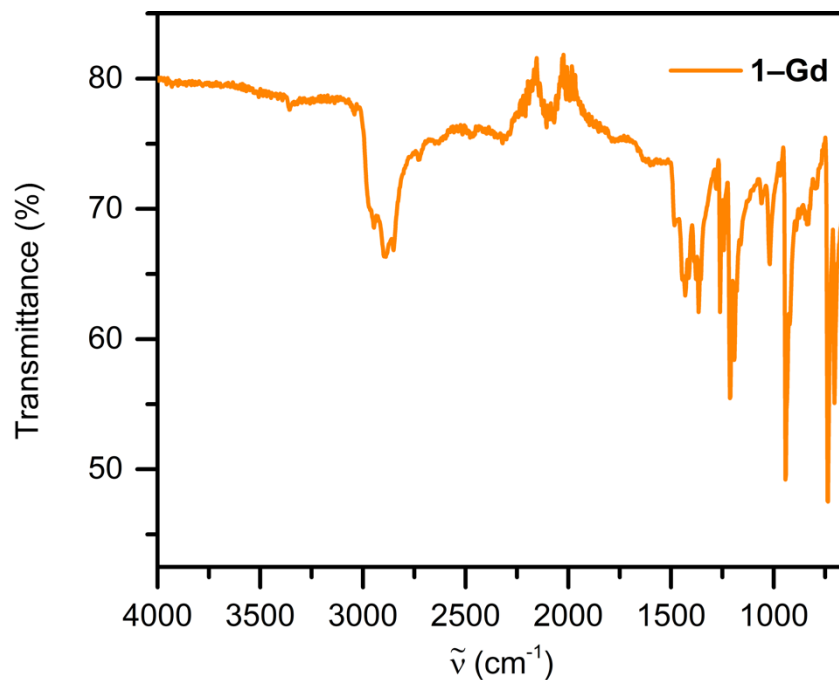

**Figure S30.** FTIR spectrum of  $\text{Cp}^*_2\text{Gd}(\text{TIP})$ , **1-Gd**.

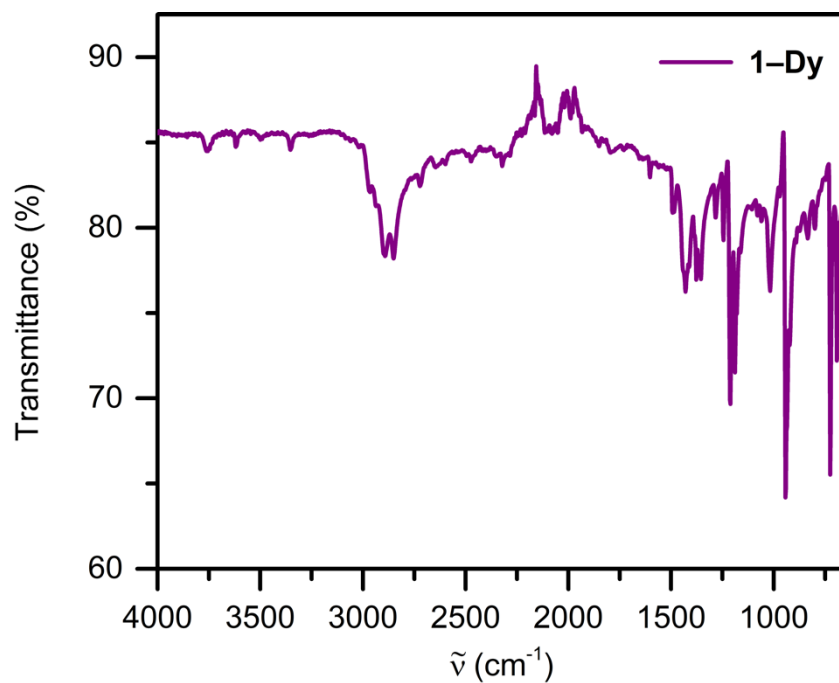

**Figure S31.** FTIR spectrum of  $\text{Cp}^*_2\text{Dy}(\text{TIP})$ , **1-Dy**.



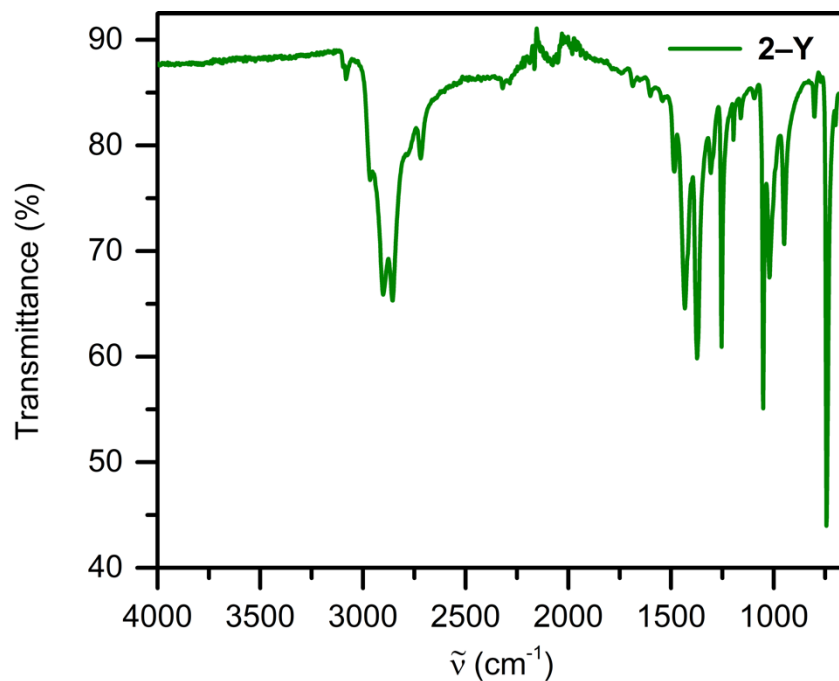

**Figure S32.** FTIR spectrum of Cp\*<sub>2</sub>Y(DMP), 2-Y.

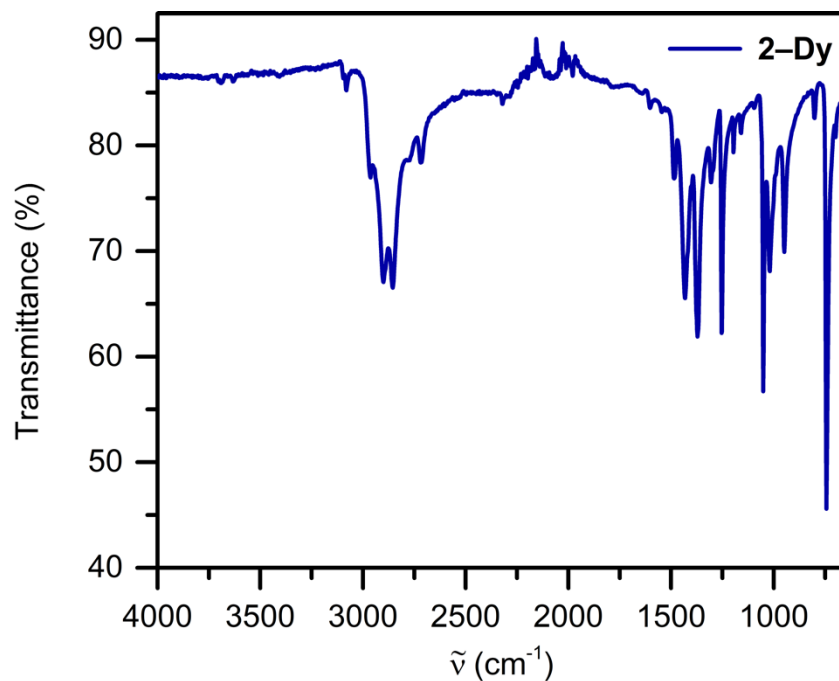

**Figure S33.** FTIR spectrum of Cp\*<sub>2</sub>Dy(DMP), 2-Dy.

## UV-vis Spectroscopy

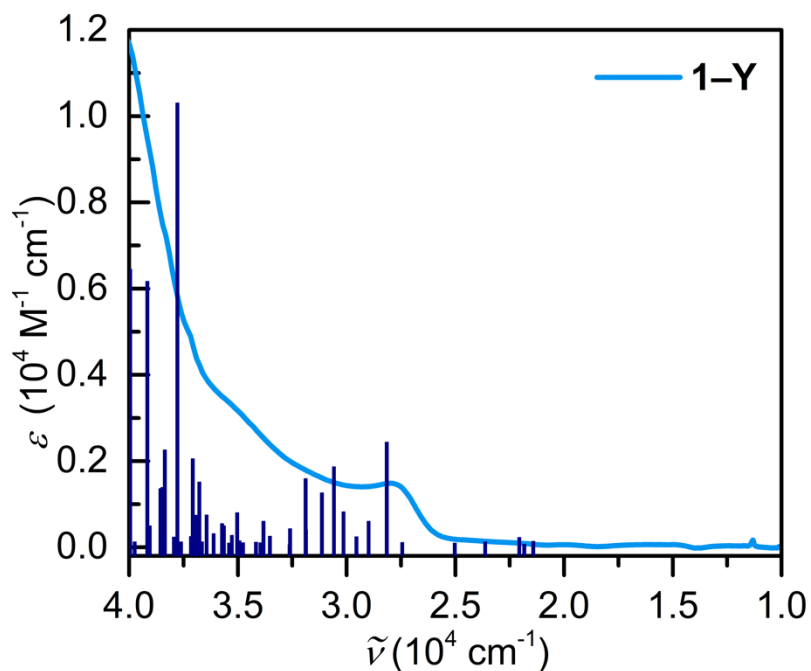

**Figure S34.** UV-vis absorption spectrum of  $\text{Cp}^*_2\text{Y}(\text{TIP})$ , **1-Y**. The light blue line represents experimental data for **1-Y** whereas the dark blue lines constitute calculated TDDFT transitions.

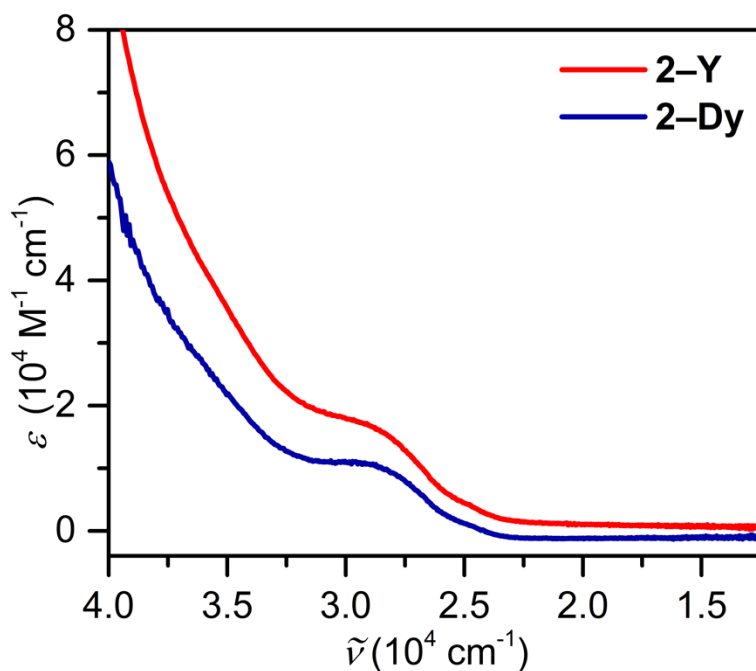

**Figure S35.** UV-vis absorption spectrum of  $\text{Cp}^*_2\text{RE}(\text{DMP})$  ( $\text{RE} = \text{Y}$  (**2-Y**), and  $\text{Dy}$  (**2-Dy**)). The red and blue line represent experimental data for **2-Y** and **2-Dy**, respectively.

## Magnetic Data

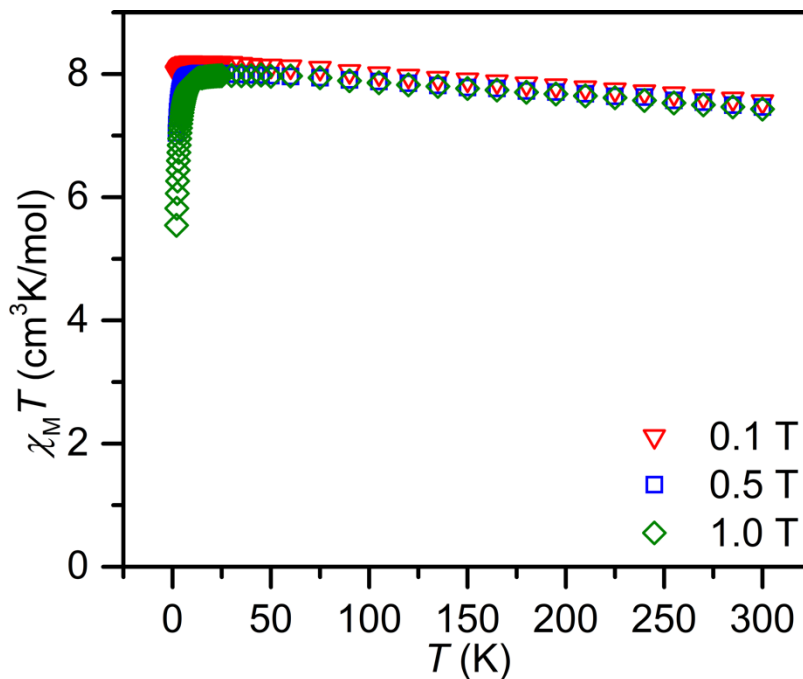

**Figure S36.** Variable-temperature dc magnetic susceptibility data ( $\chi_M T$  vs.  $T$ ) of polycrystalline Cp\*<sub>2</sub>Gd(TIP), **1-Gd**, collected under 0.1, 0.5, and 1 T applied dc fields.

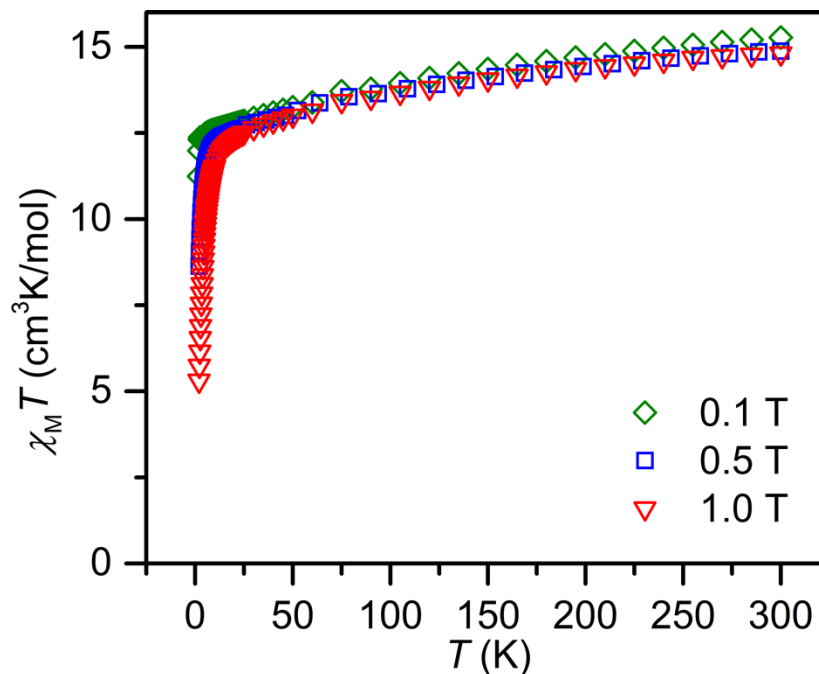

**Figure S37.** Variable-temperature dc magnetic susceptibility data ( $\chi_M T$  vs.  $T$ ) of polycrystalline Cp\*<sub>2</sub>Dy(TIP), **1-Dy**, collected under 0.1, 0.5, and 1 T applied dc fields.

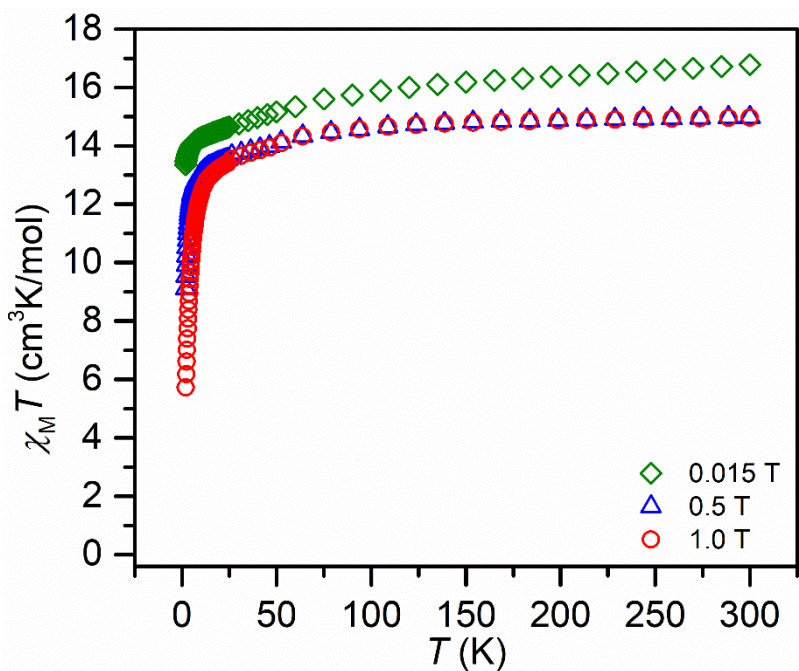

**Figure S38.** Variable-temperature dc magnetic susceptibility data ( $\chi_M T$  vs.  $T$ ) of polycrystalline  $\text{Cp}^*_2\text{Dy}(\text{DMP})$ , **2-Dy**, collected under 0.015, 0.5, and 1 T applied dc fields.

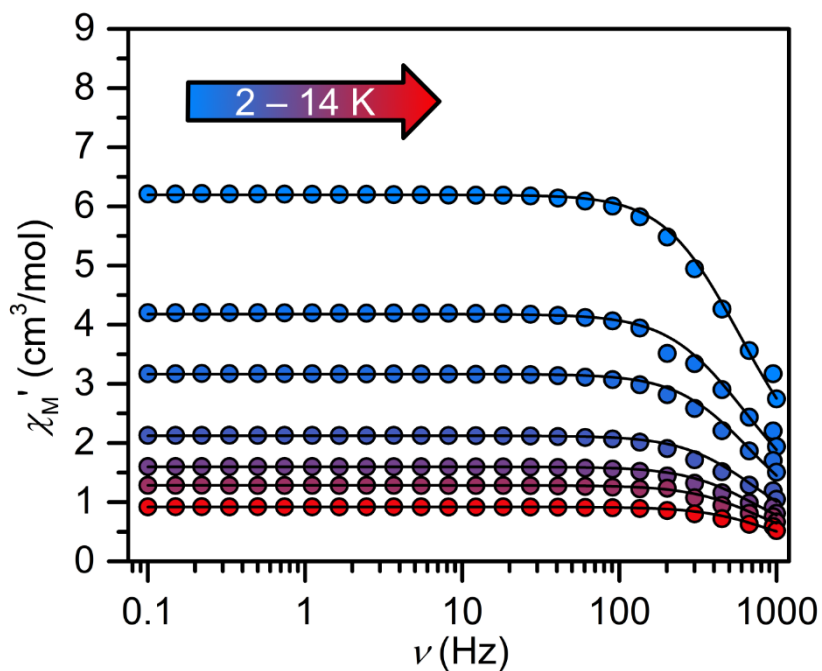

**Figure S39.** In-phase ( $\chi_M'$ ) components of the ac magnetic susceptibility for  $\text{Cp}^*_2\text{Dy}(\text{TIP})$ , **1-Dy**, under zero applied dc field from 2 K (blue circles) to 14 K (red circles). Solid lines represent fits of the data to a Cole-Davidson model.

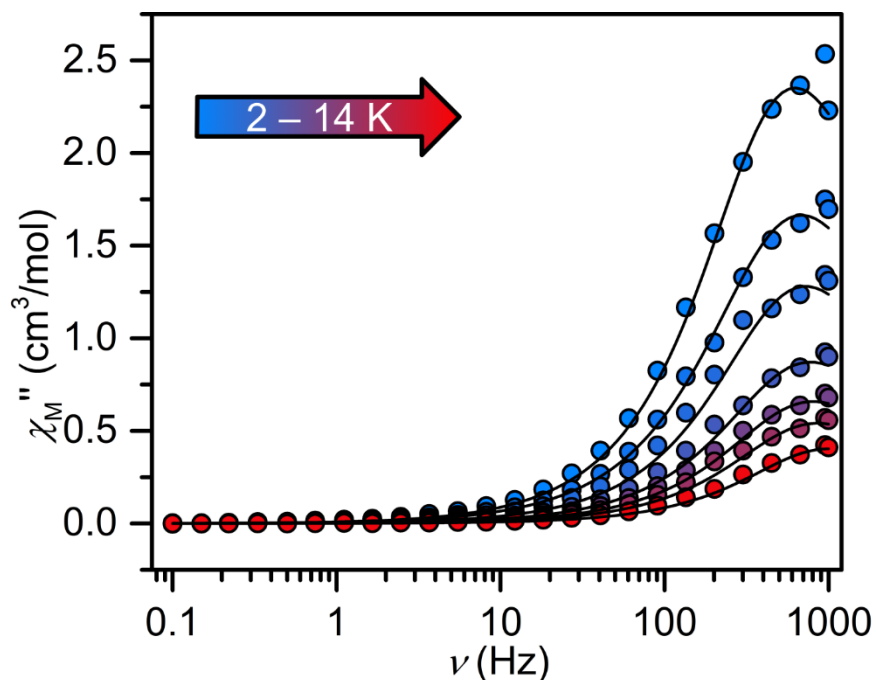

**Figure S40.** Out-of-phase ( $\chi_M''$ ) components of the ac magnetic susceptibility for  $\text{Cp}^*_2\text{Dy}(\text{TIP})$ , **1-Dy**, under a zero applied dc field from 2 K (blue) to 14 K (red). Solid lines represent fits of the data to a Cole-Davidson model.

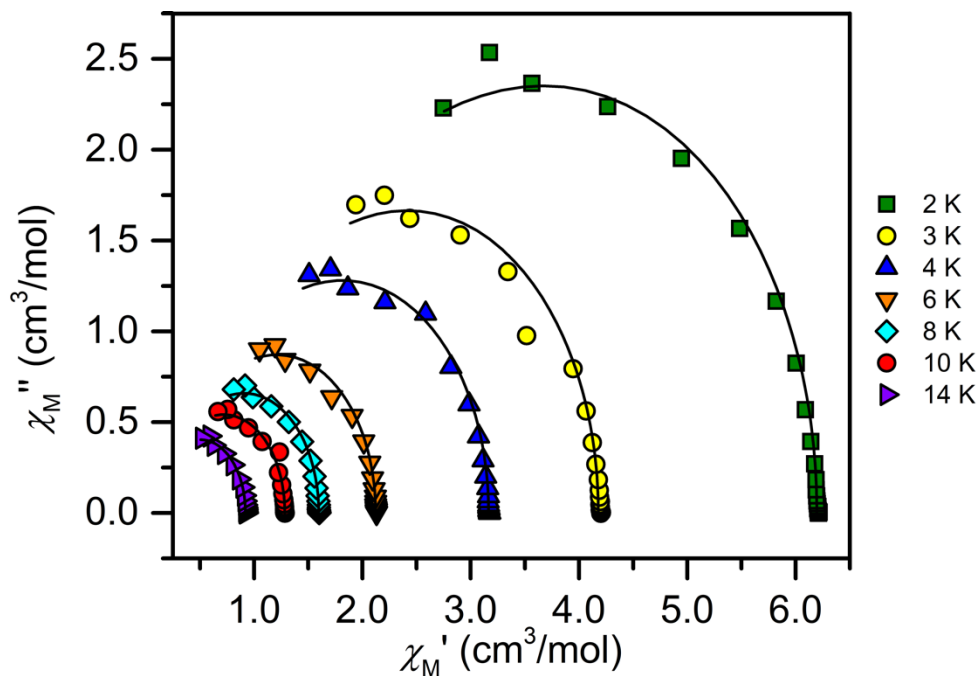

**Figure S41.** Cole-Cole plots for ac magnetic susceptibility collected from 2 to 14 K under zero applied dc field for  $\text{Cp}^*_2\text{Dy}(\text{TIP})$ , **1-Dy**. Symbols represent experimental data points and the points representing the fits are connected by solid black lines.

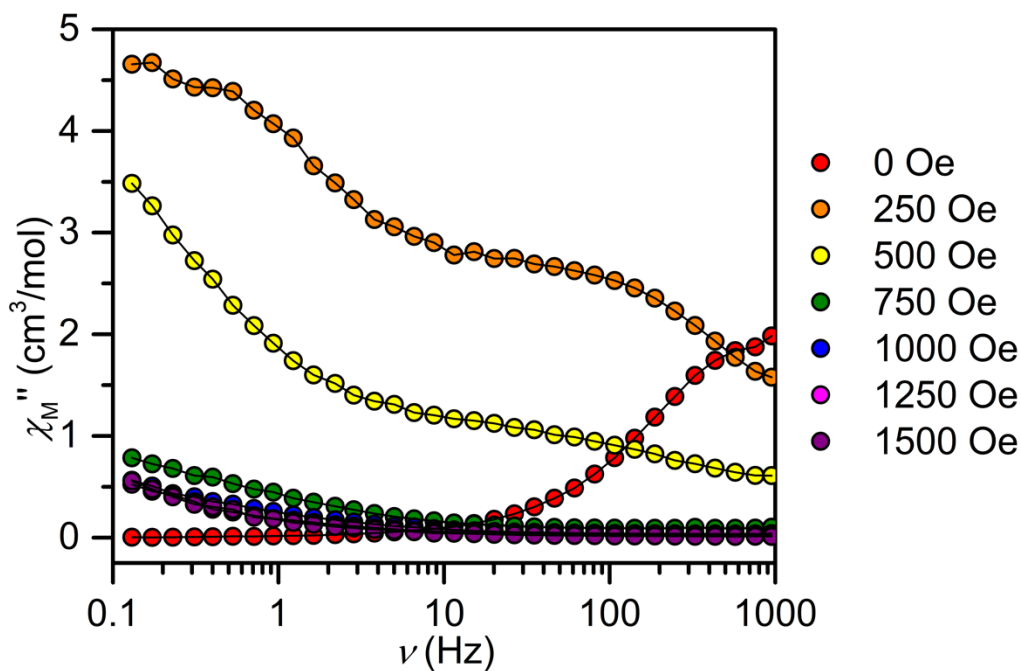

**Figure S42.** Out-of-phase ( $\chi_M''$ ) components of the ac magnetic susceptibility for  $\text{Cp}^*_2\text{Dy}(\text{TIP})$ , **1-Dy**, at 2 K under dc fields ranging from 0 Oe to 1500 Oe in 250 Oe increments. Solid lines are guides for the eye.

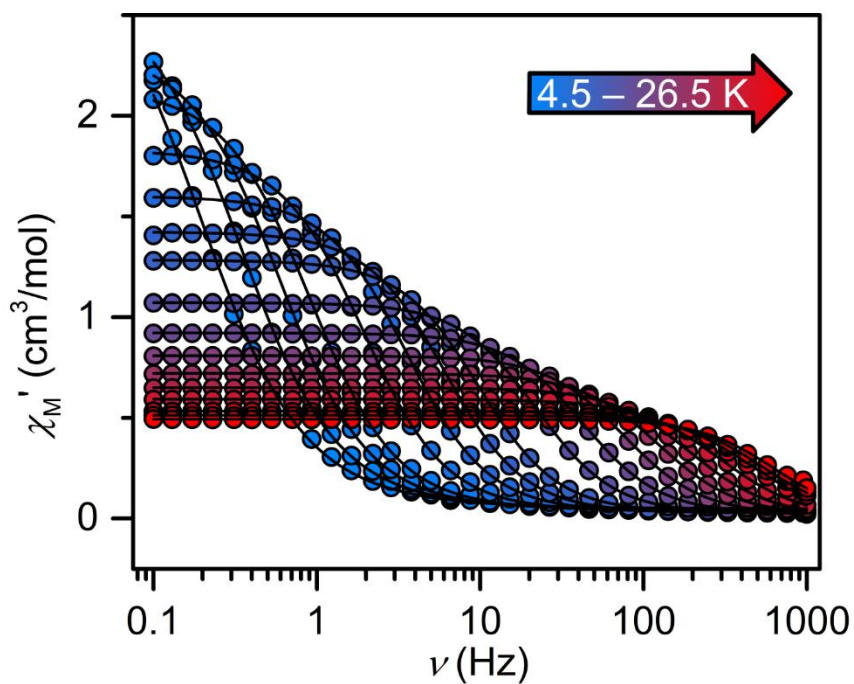

**Figure S43.** In-phase ( $\chi_M'$ ) components of the ac magnetic susceptibility for  $\text{Cp}^*_2\text{Dy}(\text{TIP})$ , **1-Dy**, under a 1250 Oe applied dc field from 4.5 K (blue circles) to 26.5 K (red circles). Solid lines represent fits of the data to a generalized Debye model.

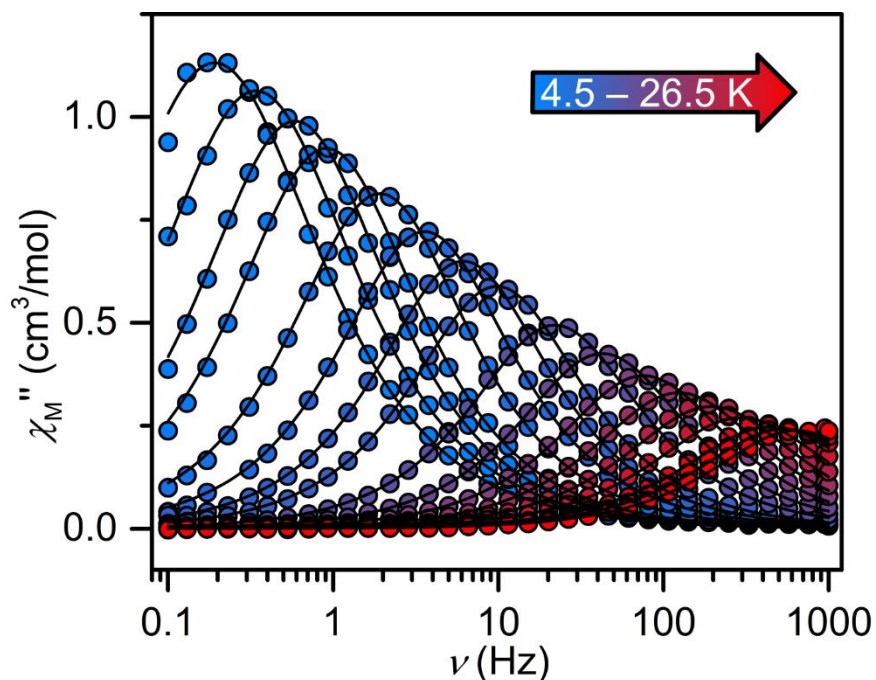

**Figure S44.** Out-of-phase ( $\chi_M''$ ) components of the ac magnetic susceptibility for  $\text{Cp}^*_2\text{Dy}(\text{TIP})$ , **1-Dy**, under a 1250 Oe applied dc field from 4.5 (blue) to 26.5 K (red). Solid lines represent fits of the data to a generalized Debye model.

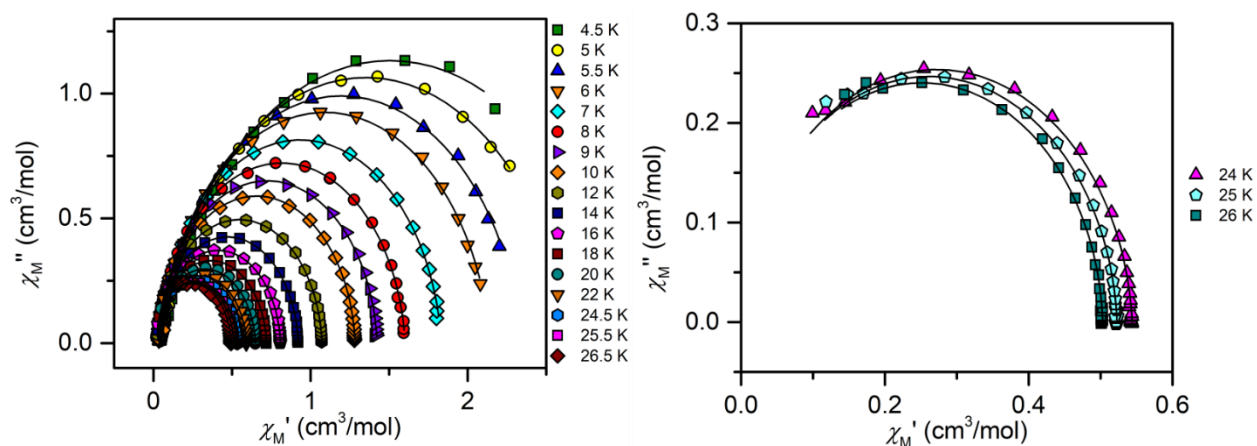

**Figure S45.** Cole–Cole plots for ac magnetic susceptibility collected from 4.5 to 26.5 K under a 1250 Oe applied dc field for  $\text{Cp}^*_2\text{Dy}(\text{TIP})$ , **1-Dy**. Symbols represent experimental data points and the points representing the fits are connected by solid black lines.

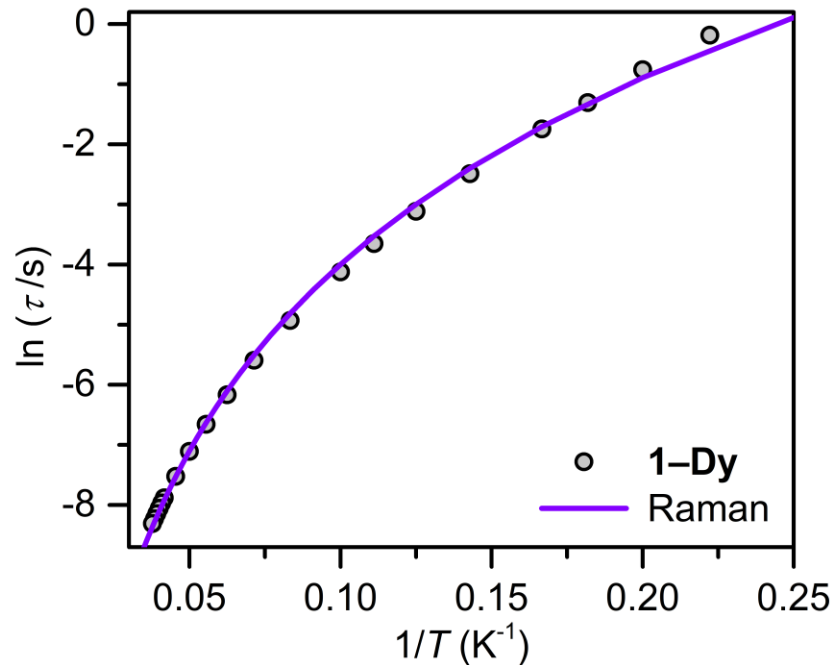

**Figure S46.** Arrhenius plot of the natural log of the relaxation time,  $\tau$ , versus the inverse temperature,  $1/T$ , obtained from ac measurements, for 1-Dy (circles). The purple line represents a fit to a Raman process affording  $C = 0.0018(2) \text{ s}^{-1} \text{ K}^{-n}$ , and  $n = 4.48(3)$ .

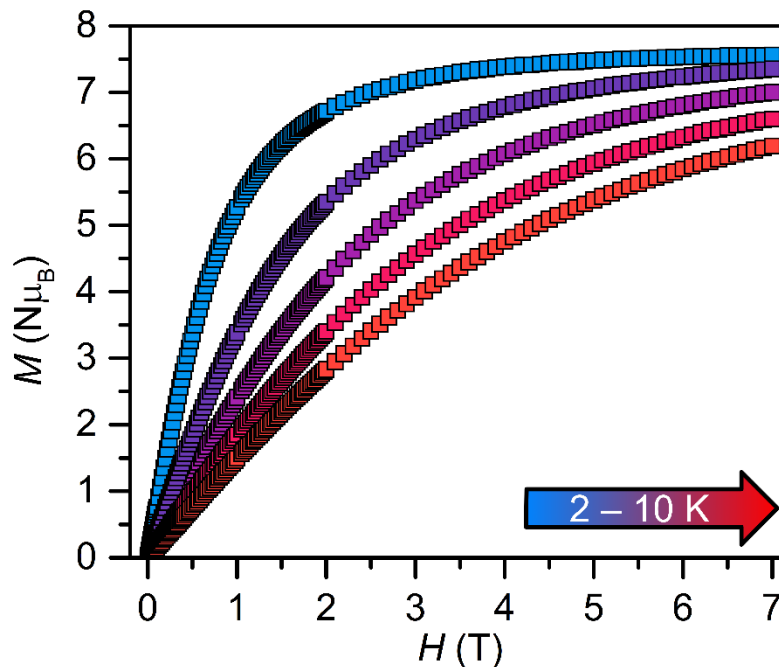

**Figure S47.** Field-dependent magnetization data for  $\text{Cp}^*_2\text{Gd}(\text{TIP})$ , 1-Gd, between 0 and 7 T from 2 to 10 K.



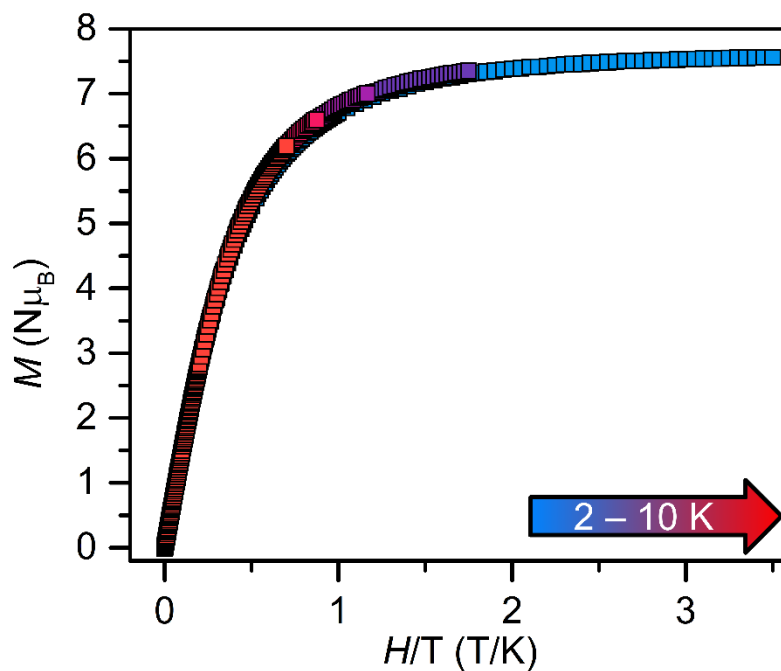

**Figure S48.** Field-dependent reduced magnetization data for  $\text{Cp}^*_2\text{Gd}(\text{TIP})$ , **1-Gd**, between 0 and 7 T from 2 to 10 K.

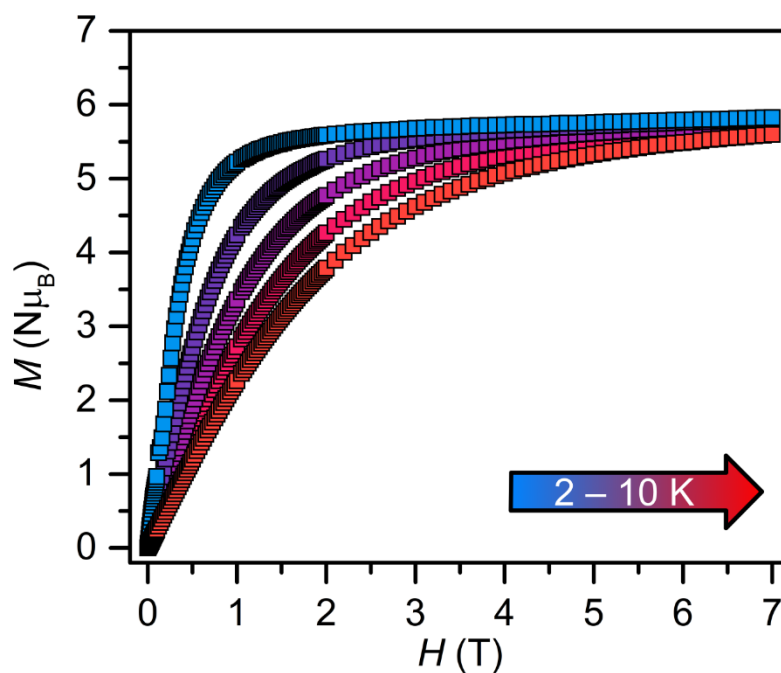

**Figure S49.** Field-dependent magnetization data for  $\text{Cp}^*_2\text{Dy}(\text{TIP})$ , **1-Dy**, between 0 and 7 T from 2 to 10 K.

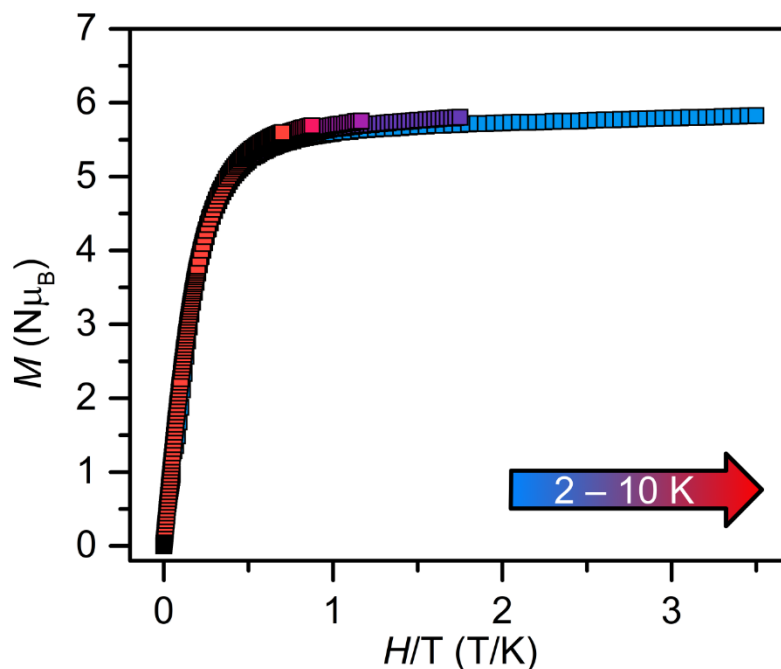

**Figure S50.** Field-dependent reduced magnetization data for  $\text{Cp}^*\text{2Dy}(\text{TIP})$ , **1-Dy**, between 0 and 7 T from 2 to 10 K.

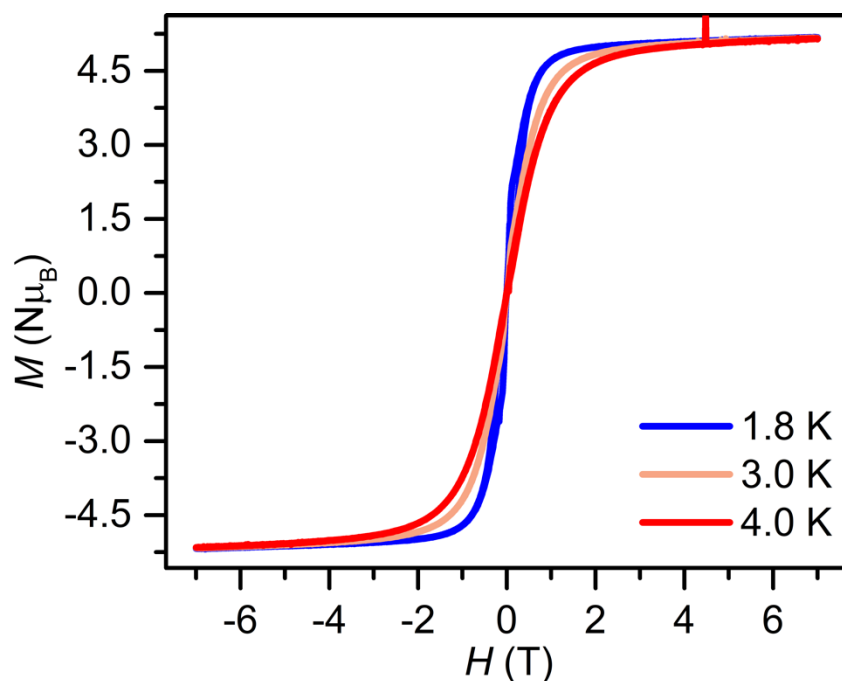

**Figure S51.** Plot of magnetization ( $M$ ) vs. dc magnetic field ( $H$ ) at an average sweep rate of 100 Oe/s for  $\text{Cp}^*\text{2Dy}(\text{TIP})$ , **1-Dy**, from 1.8 K (blue) to 4 K (red) collected between  $-7$  and  $+7$  T.

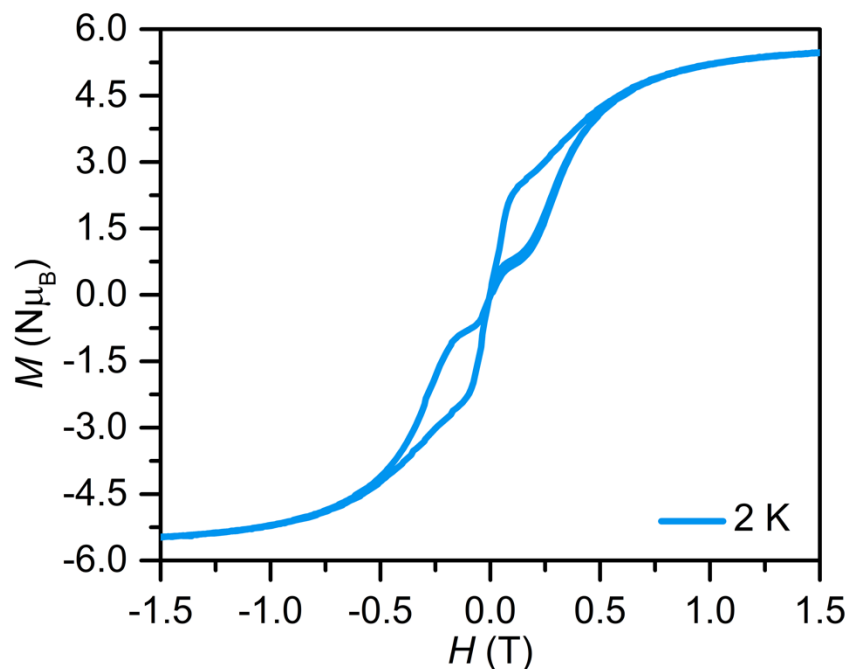

**Figure S52.** Plot of magnetization ( $M$ ) vs. dc magnetic field ( $H$ ) at an average sweep rate of 100 Oe/s for  $\text{Cp}^*_2\text{Dy}(\text{TIP})$ , **1-Dy**, at 2 K from  $-0.5$  and  $+0.5$  T.

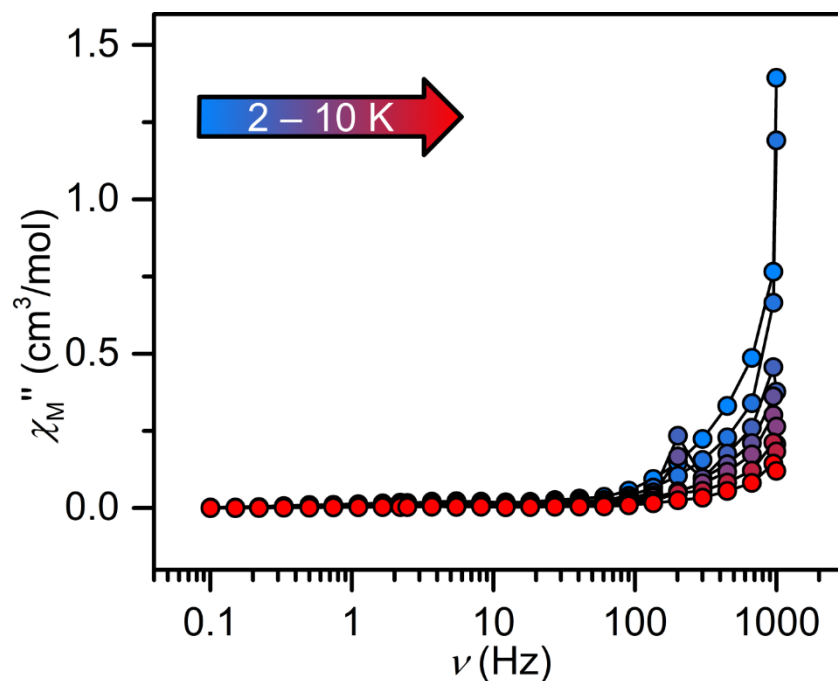

**Figure S53.** Out-of-phase ( $\chi_M''$ ) components of the ac magnetic susceptibility for  $\text{Cp}^*_2\text{Dy}(\text{DMP})$ , **2-Dy**, under a zero applied dc field from 2 K (blue) to 10 K (red). Solid lines are guides for the eye.

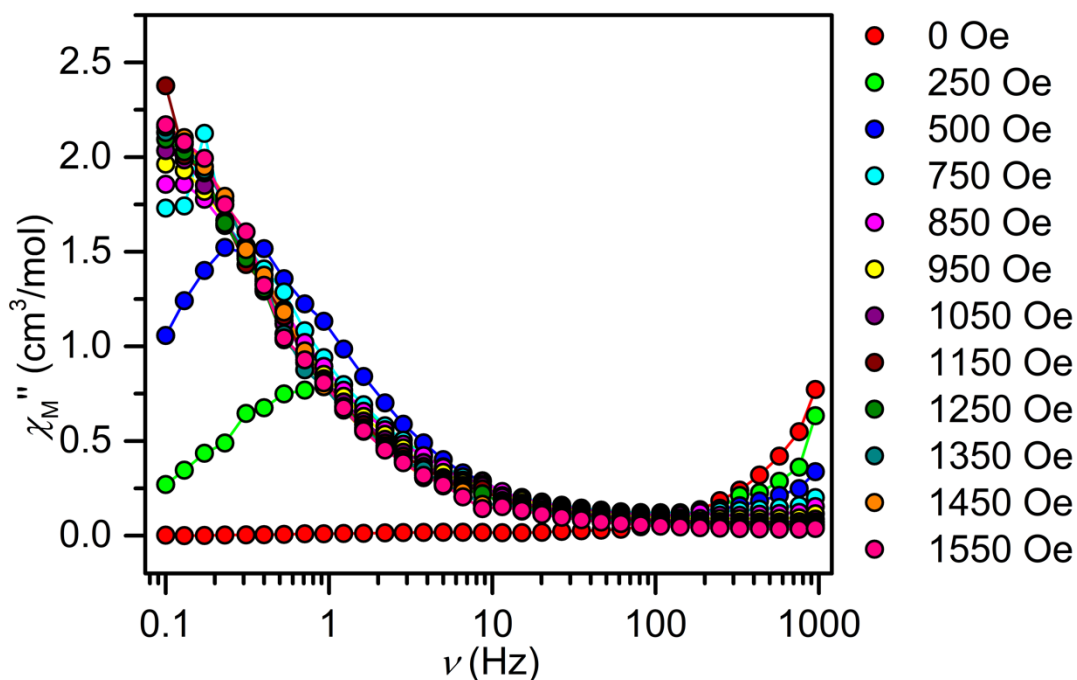

**Figure S54.** Out-of-phase ( $\chi_M''$ ) components of the ac magnetic susceptibility for  $\text{Cp}^*_2\text{Dy}(\text{DMP})$ , **2-Dy**, at 2 K under dc fields ranging from 0 Oe to 1550 Oe. Solid lines are guides for the eye.

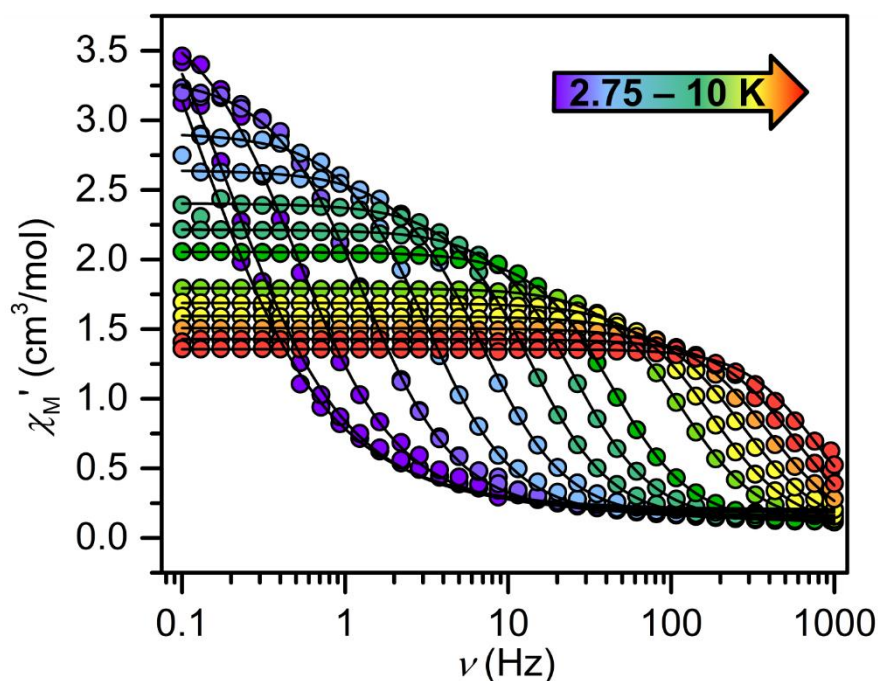

**Figure S55.** In-phase ( $\chi_M'$ ) components of the ac magnetic susceptibility for  $\text{Cp}^*_2\text{Dy}(\text{DMP})$ , **2-Dy**, under a 1450 Oe applied dc field from 2.75 K (purple circles) to 10 K (red circles). Solid lines represent fits of the data to a generalized Debye model.

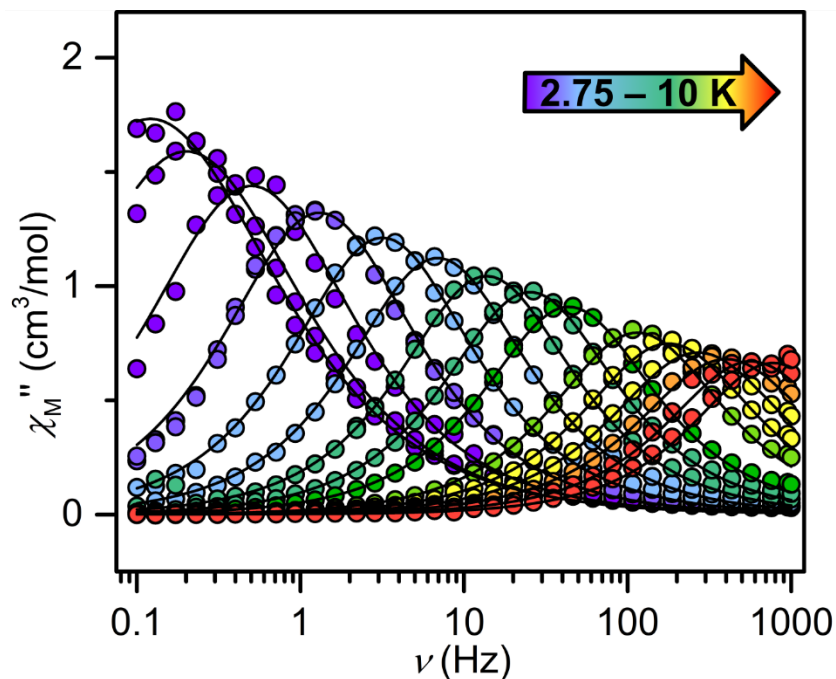

**Figure S56.** Out-of-phase ( $\chi_M''$ ) components of the ac magnetic susceptibility for  $\text{Cp}^*_2\text{Dy}(\text{DMP})$ , **2-Dy**, under a 1450 Oe applied dc field from 2.75 K (purple) to 10 K (red). Solid lines represent fits of the data to a generalized Debye model.

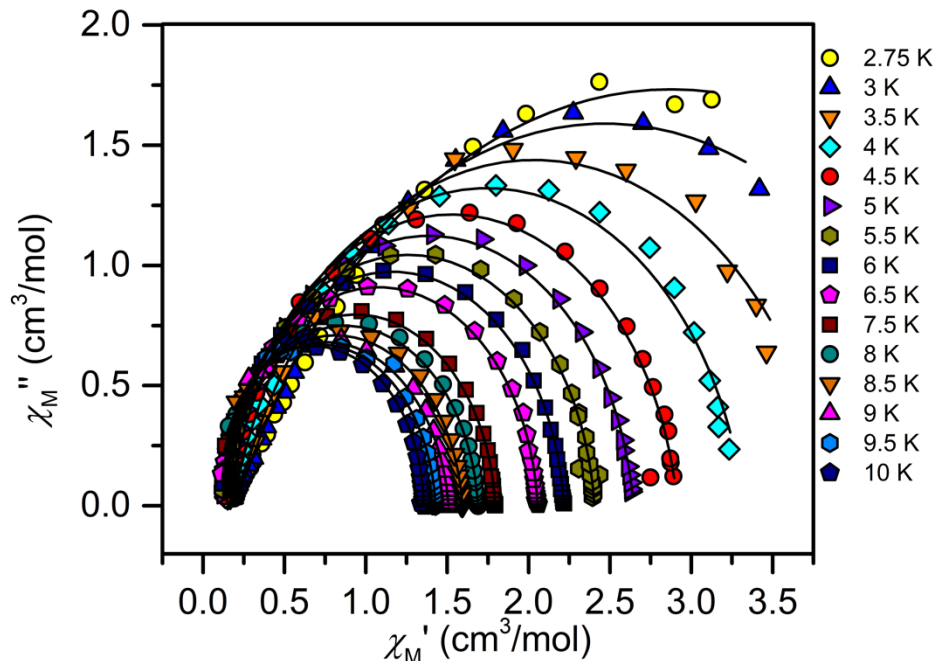

**Figure S57.** Cole–Cole plots for ac magnetic susceptibility collected from 2.75 to 10 K under a 1450 Oe applied dc field for  $\text{Cp}^*_2\text{Dy}(\text{DMP})$ , **2-Dy**. Symbols represent experimental data points and the points representing the fits are connected by solid black lines.

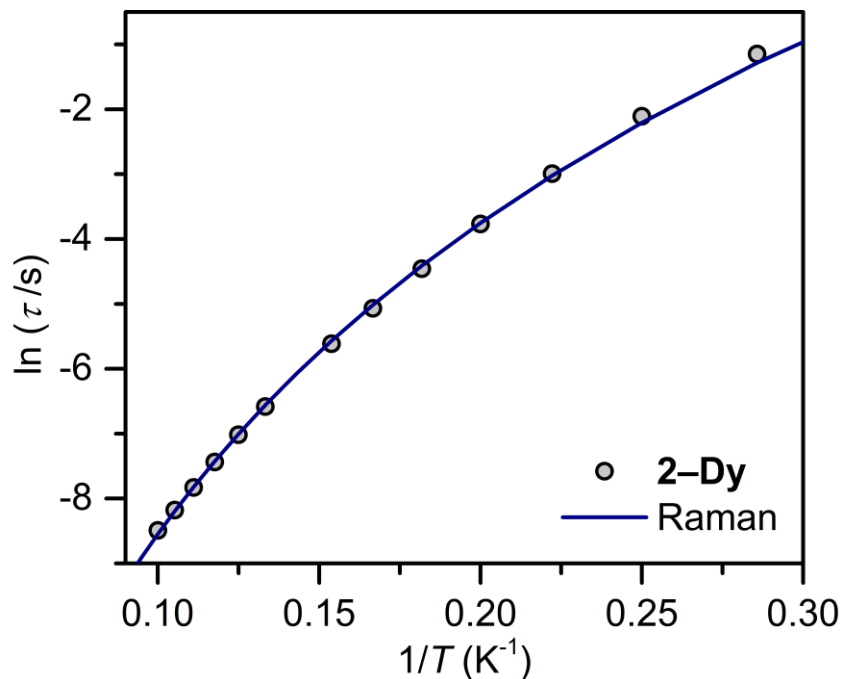

**Figure S58.** Arrhenius plot of the natural log of the relaxation time,  $\tau$ , versus the inverse temperature,  $1/T$ , obtained from ac measurements, for **2-Dy** (circles). The dark blue line represents a fit to a Raman process affording  $C = 0.00062(5) \text{ s}^{-1} \text{ K}^{-n}$ , and  $n = 6.92(4)$ .

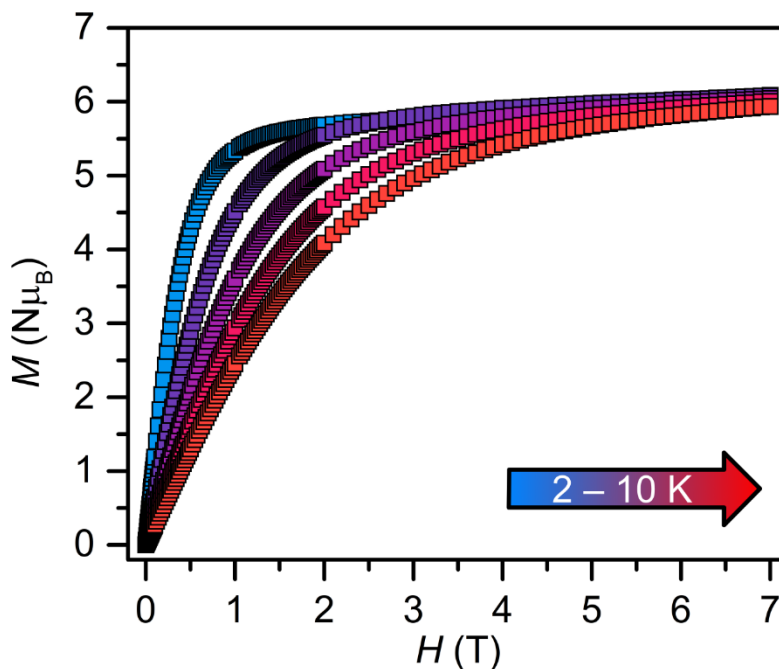

**Figure S59.** Field-dependent magnetization data for  $\text{Cp}^*_2\text{Dy}(\text{DMP})$ , **2-Dy**, between 0 and 7 T from 2 to 10 K.

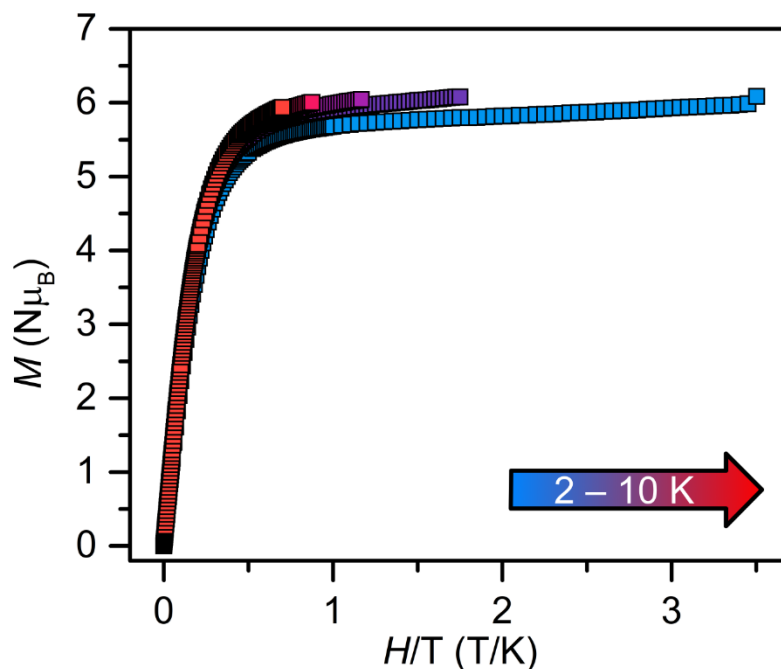

**Figure S60.** Field-dependent reduced magnetization data for  $\text{Cp}^*\text{2Dy}(\text{DMP})$ , **2-Dy**, between 0 and 7 T from 2 to 10 K.

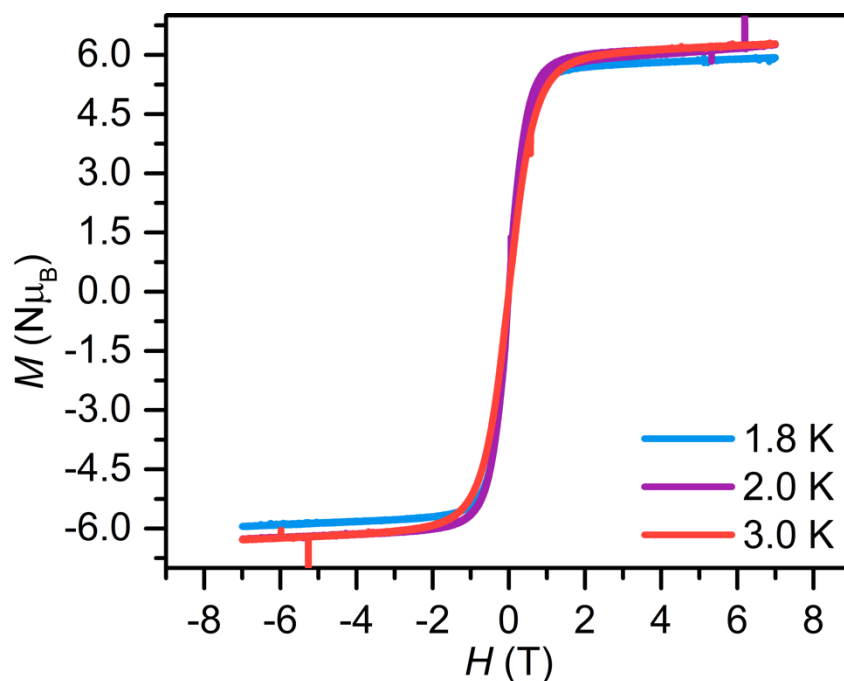

**Figure S61.** Plot of magnetization ( $M$ ) vs. dc magnetic field ( $H$ ) at an average sweep rate of 100 Oe/s for  $\text{Cp}^*\text{2Dy}(\text{DMP})$ , **2-Dy**, from 1.8 K (blue) to 3 K (red) collected between  $-7$  and  $+7$  T.

## EPR Spectroscopy

**Table S10.** Spin Hamiltonian Parameters for Cp\*<sub>2</sub>Gd(TIP), **1–Gd**.

| Temperature<br>(K) | $D$<br>(cm <sup>-1</sup> ) | $ E $<br>(cm <sup>-1</sup> ) | $ E /D$ | $\sigma_D$<br>(cm <sup>-1</sup> ) | $\sigma_E$<br>(cm <sup>-1</sup> ) | $g_{iso}$ |
|--------------------|----------------------------|------------------------------|---------|-----------------------------------|-----------------------------------|-----------|
| 5                  | -0.121                     | 0.039                        | 0.322   | 0.008                             | 0.005                             | 1.992     |
| 100                | -0.122                     | 0.037                        | 0.304   | 0.008                             | 0.005                             | 1.992     |



## **Ab Initio Calculations**

The magnetic properties of  $\text{Cp}^*_2\text{Dy}(\text{TIP})$  (**1-Dy**) and  $\text{Cp}^*_2\text{Dy}(\text{DMP})$  (**2-Dy**) were calculated via a Complete Active Space Self-Consistent Field (CASSCF)+N-Valence Electron Perturbation Theory (NEVPT2) approach with the RI-JK approximation as implemented in ORCA 5.0.4.<sup>1,2</sup>

Scalar relativistic effects were accounted for with the second order Douglas-Kroll approach,<sup>2,3</sup> where the DKH-def2-SVP basis set was used for H and  $\text{Cp}^*$  methyl C atoms,<sup>4</sup> DKH-def2-TZVP<sup>5</sup> for N and I atoms and SARC2-DKH-QZVP/SARC2-DKH-QZVP/JK basis sets for the Dy atoms.<sup>5</sup> DKH-def2-TZVP was used for the C atoms of the first coordination sphere and pyrrole ligands. Auxiliary basis sets for C, N, I and H were generated via the autoaux feature.<sup>6</sup> The frozen core approximation was disabled for all calculations. Tight convergence criteria were employed throughout with an energy convergence tolerance of  $1\text{e}-07$ . All calculations used a finer integration grid (defgrid 3). The calculations were carried out on the coordinates obtained from single-crystal XRD for **1-Dy** at 100 K, 200 K and 300 K, where all hydrogen position were initially optimized via PBE0 functional.<sup>7-9</sup> using an eleven-electrons-in-seven-4f-orbitals active space. 21 quintet, 128 triplet and 130 doublet roots were considered for the state averaged (SA) CASSCF calculation. The same active space was used **2-Dy**. Dynamic correlation effects were introduced via strongly contracted NEVPT2 (SC-NEVPT2).<sup>6,10,11</sup> The construction of the fourth order reduced density matrix was simplified via the efficient implementation (D4step efficient).<sup>1,12</sup> The orbital energies of the SA-CASSCF were chosen as diagonal elements of the state-specific Fock operators (canonstep 0). Spin-Orbit-Coupling (SOC) effects were included within the NEVPT2 step via Quasi-Degenerate Perturbation Theory (QDPT) using the mean-field/effective potential Hamiltonian RI-SOMF(1x).<sup>13,14</sup> The free-particle Foldy-Wouthuysen (fpFW) transformation was carried out in the first step of the DKH protocol by including the vector potential. Picture change corrections were included on the second order, as well as finite nucleus corrections.<sup>15</sup>

Lastly, the magnetic properties such as  $g$ -tensors, crystal field parameters and estimated single-ion anisotropy barrier were calculated via the SINGLE\_ANISO standalone program.<sup>15</sup>

**Table S11.** Calculated Kramers doublet (KD) energies associated magnetic moments,  $g$ -tensors and wavefunction composition for Cp\*<sub>2</sub>Dy(TIP) (1–Dy) at 100 K. Only contributions > 10% are printed. The angle  $\theta$  between the ground state anisotropy axis and excited KDs are given in degrees (°). The wavefunction decompositions correspond to the lowest atomic multiplet  $J = 15/2$  in wave functions with definite projection of the total moment to the quantization axis.

| KD | E (cm <sup>-1</sup> ) | M (μ <sub>B</sub> ) | $g_x$  | $g_y$  | $g_z$   | $\theta$ (°) | Wave function composition                                                  |
|----|-----------------------|---------------------|--------|--------|---------|--------------|----------------------------------------------------------------------------|
| 1  | 0.0                   | 9.73                | 0.0084 | 0.0161 | 19.4562 | 0.0          | ±15/2⟩ (93%)                                                               |
| 2  | 202.2                 | 7.88                | 0.3062 | 0.6631 | 15.7623 | 0.3          | ±13/2⟩ (81%);  ±9/2⟩ (14%)                                                 |
| 3  | 296.8                 | 1.49                | 2.9595 | 3.1846 | 14.9503 | 92.3         | ±11/2⟩ (12%);  ±7/2⟩ (20%);<br> ±5/2⟩ (11%);  ±3/2⟩ (26%);<br> ±1/2⟩ (23%) |
| 4  | 376.3                 | 2.67                | 3.5333 | 5.3309 | 7.9747  | 97.1         | ±11/2⟩ (47%);  ±5/2⟩ (16%);<br> ±1/2⟩ (10%)                                |
| 5  | 488.5                 | 0.69                | 1.3789 | 1.4444 | 11.7423 | 94.9         | ±11/2⟩ (23%);  ±9/2⟩ (38%);<br> ±3/2⟩ (15%)                                |
| 6  | 628.6                 | 0.06                | 0.0066 | 0.0270 | 14.7281 | 94.1         | ±11/2⟩ (10%);  ±9/2⟩ (30%);<br> ±7/2⟩ (36%);  ±5/2⟩ (12%);                 |
| 7  | 819.6                 | 0.04                | 0.0193 | 0.0200 | 17.2044 | 85.8         | ±7/2⟩ (25%);  ±5/2⟩ (37%);<br> ±3/2⟩ (25%)                                 |
| 8  | 1051.7                | 0.01                | 0.0034 | 0.0061 | 19.5906 | 94.9         | ±5/2⟩ (14%);  ±3/2⟩ (33%);<br> ±1/2⟩ (50%)                                 |

**Table S12.** Calculated Kramers doublet (KD) energies associated magnetic moments,  $g$ -tensors and wavefunction composition for Cp\*<sub>2</sub>Dy(TIP) (1–Dy) at 200 K. Only contributions > 10% are printed. The angle  $\theta$  between the ground state anisotropy axis and excited KDs are given in degree (°). The wavefunction decompositions correspond to the lowest atomic multiplet  $J = 15/2$  in wave functions with definite projection of the total moment to the quantization axis.

| KD | E (cm <sup>-1</sup> ) | M (μ <sub>B</sub> ) | $g_x$  | $g_y$  | $g_z$   | $\theta$ (°) | Wave function composition                                                  |
|----|-----------------------|---------------------|--------|--------|---------|--------------|----------------------------------------------------------------------------|
| 1  | 0.0                   | 9.73                | 0.0084 | 0.0159 | 19.4527 | 0.0          | ±15/2⟩ (93%)                                                               |
| 2  | 202.7                 | 7.92                | 0.2654 | 0.5657 | 15.8498 | 0.3          | ±13/2⟩ (83%);  ±9/2⟩ (14%)                                                 |
| 3  | 300.4                 | 1.43                | 2.8650 | 3.0602 | 15.2788 | 93.1         | ±11/2⟩ (12%);  ±7/2⟩ (19%);<br> ±5/2⟩ (12%);  ±3/2⟩ (27%);<br> ±1/2⟩ (24%) |
| 4  | 378.5                 | 2.85                | 3.5676 | 5.6820 | 7.8494  | 99.0         | ±11/2⟩ (48%);  ±5/2⟩ (16%);<br> ±1/2⟩ (10%)                                |
| 5  | 488.1                 | 0.78                | 1.5503 | 1.6371 | 11.6915 | 95.5         | ±11/2⟩ (22%);  ±9/2⟩ (39%);<br> ±3/2⟩ (15%)                                |
| 6  | 625.0                 | 0.11                | 0.0045 | 0.0335 | 14.7198 | 94.4         | ±11/2⟩ (10%);  ±9/2⟩ (30%);<br> ±7/2⟩ (36%);  ±5/2⟩ 12%)                   |
| 7  | 814.7                 | 0.05                | 0.0265 | 0.0268 | 17.2067 | 84.5         | ±7/2⟩ (25%);  ±5/2⟩ (37%);<br> ±3/2⟩ (25%)                                 |
| 8  | 1051.5                | 0.02                | 0.0040 | 0.0070 | 19.5906 | 95.9         | ±5/2⟩ (14%);  ±3/2⟩ (33%);<br> ±15/2⟩ (50%)                                |

**Table S13.** Calculated Kramers doublet (KD) energies associated magnetic moments,  $g$ -tensors and wavefunction composition for Cp\*<sub>2</sub>Dy(TIP) (**1–Dy**) at 300 K. Only contributions > 10% are printed. The angle  $\theta$  between the ground state anisotropy axis and excited KDs are given in degree (°). The wavefunction decompositions correspond to the lowest atomic multiplet  $J = 15/2$  in wave functions with definite projection of the total moment to the quantization axis.

| KD | E (cm <sup>-1</sup> ) | M (μ <sub>B</sub> ) | $g_x$  | $g_y$  | $g_z$   | $\theta$ (°) | Wave function composition                                                                                                          |
|----|-----------------------|---------------------|--------|--------|---------|--------------|------------------------------------------------------------------------------------------------------------------------------------|
| 1  | 0.0                   | 9.71                | 0.0071 | 0.0146 | 19.4144 | 0.0          | $ \pm 15/2\rangle$ (92%)                                                                                                           |
| 2  | 201.7                 | 7.82                | 0.3808 | 0.8273 | 15.6386 | 0.4          | $ \pm 13/2\rangle$ (80%); $ \pm 9/2\rangle$ (15%)                                                                                  |
| 3  | 297.7                 | 1.33                | 2.6485 | 3.2146 | 15.0056 | 92.8         | $ \pm 11/2\rangle$ (11%); $ \pm 7/2\rangle$ (19%);<br>$ \pm 5/2\rangle$ (11%); $ \pm 3/2\rangle$ (27%);<br>$ \pm 1/2\rangle$ (24%) |
| 4  | 384.4                 | 2.78                | 3.7543 | 5.5580 | 7.9333  | 98.5         | $ \pm 11/2\rangle$ (47%); $ \pm 7/2\rangle$ (10%);<br>$ \pm 5/2\rangle$ (16%); $ \pm 1/2\rangle$ (10%)                             |
| 5  | 500.2                 | 0.67                | 1.3441 | 1.4908 | 11.7458 | 95.0         | $ \pm 11/2\rangle$ (23%); $ \pm 9/2\rangle$ (37%);<br>$ \pm 3/2\rangle$ (15%)                                                      |
| 6  | 642.2                 | 0.13                | 0.0087 | 0.0508 | 14.7230 | 93.7         | $ \pm 11/2\rangle$ (11%); $ \pm 9/2\rangle$ (31%);<br>$ \pm 7/2\rangle$ (35%); $ \pm 5/2\rangle$ (12%);<br>$ \pm 1/2\rangle$ (10%) |
| 7  | 835.5                 | 0.08                | 0.0332 | 0.0343 | 17.2023 | 86.0         | $ \pm 7/2\rangle$ (25%); $ \pm 5/2\rangle$ (36%);<br>$ \pm 3/2\rangle$ (25%)                                                       |
| 8  | 1081.5                | 0.01                | 0.0044 | 0.0072 | 19.6099 | 95.1         | $ \pm 5/2\rangle$ (14%); $ \pm 3/2\rangle$ (33%);<br>$ \pm 1/2\rangle$ (49%)                                                       |

**Table S14.** Calculated Kramers doublet (KD) energies associated magnetic moments,  $g$ -tensors and wavefunction composition for Cp\*<sub>2</sub>Dy(DMP) (**2–Dy**). Only contributions > 10% are printed. The angle  $\theta$  between the ground state anisotropy axis and excited KDs are given in degree (°). The wavefunction decompositions correspond to the lowest atomic multiplet  $J = 15/2$  in wave functions with definite projection of the total moment to the quantization axis.

| KD | E (cm <sup>-1</sup> ) | M (μ <sub>B</sub> ) | $g_x$  | $g_y$  | $g_z$   | $\theta$ (°) | Wave function composition                                                                                                          |
|----|-----------------------|---------------------|--------|--------|---------|--------------|------------------------------------------------------------------------------------------------------------------------------------|
| 1  | 0.0                   | 9.30                | 0.1872 | 0.5077 | 18.5949 | 0.0          | $ \pm 15/2\rangle$ (83%); $ \pm 11/2\rangle$ (13%)                                                                                 |
| 2  | 125.6                 | 2.34                | 2.3943 | 4.6816 | 13.9284 | 92.2         | $ \pm 13/2\rangle$ (17%); $ \pm 9/2\rangle$ (15%);<br>$ \pm 5/2\rangle$ (20%); $ \pm 3/2\rangle$ (16%);<br>$ \pm 1/2\rangle$ (23%) |
| 3  | 210.7                 | 3.82                | 7.6554 | 5.3214 | 0.8503  | 94.8         | $ \pm 13/2\rangle$ (51%); $ \pm 9/2\rangle$ (10%);<br>$ \pm 7/2\rangle$ (11%); $ \pm 3/2\rangle$ (15%)                             |
| 4  | 369.6                 | 1.93                | 3.8507 | 5.1872 | 8.3902  | 85.1         | $ \pm 13/2\rangle$ (14%); $ \pm 11/2\rangle$ (30%);<br>$ \pm 7/2\rangle$ (20%); $ \pm 5/2\rangle$ (16%)                            |
| 5  | 524.2                 | 0.38                | 0.2827 | 0.7335 | 11.9383 | 86.8         | $ \pm 13/2\rangle$ (12%); $ \pm 11/2\rangle$ (35%);<br>$ \pm 9/2\rangle$ (26%); $ \pm 3/2\rangle$ (13%)                            |
| 6  | 687.9                 | 0.24                | 0.1973 | 0.3052 | 14.7529 | 89.3         | $ \pm 11/2\rangle$ (16%); $ \pm 9/2\rangle$ (34%);<br>$ \pm 7/2\rangle$ (28%)                                                      |
| 7  | 903.6                 | 0.21                | 0.0432 | 0.0510 | 17.2401 | 89.4         | $ \pm 9/2\rangle$ (12%); $ \pm 7/2\rangle$ (27%);<br>$ \pm 5/2\rangle$ (34%); $ \pm 3/2\rangle$ (21%)                              |
| 8  | 1192.1                | 0.02                | 0.0040 | 0.0045 | 19.6655 | 87.8         | $ \pm 5/2\rangle$ (15%); $ \pm 3/2\rangle$ (33%);<br>$ \pm 1/2\rangle$ (47%);                                                      |

**Table S15.** Crystal field parameters calculated for Cp\*<sub>2</sub>Dy(TIP) (**1-Dy**) at 100 K via the SINGLE\_ANISO program. The Hamiltonian employed to calculate the crystal field parameters is given by:

$$\hat{H}_{CF} = \sum_{k=2,4,6} \sum_{k=-q}^{+q} [B_k^q \hat{O}_k^q(S)]$$

where  $\hat{O}_k^q$  is the extended Stevens operator as implemented in the “EasySpin” package for MATLAB,  $B_k^q$  the crystal field parameter,  $k$  is the rank of the irreducible tensor operator (ITO) (2,4,6),  $q$  is the component of the ITO ( $q = -k, -k+1, \dots, 0, 1, \dots, k$ ).

| $k$ | $q$ | Weight (%) | $B_q^k$   | $k$ | $q$ | Weight (%) | $B_q^k$   |
|-----|-----|------------|-----------|-----|-----|------------|-----------|
| 2   | -2  | 2.8        | -4.90E-01 | 6   | -6  | 2.1        | 1.31E-04  |
|     | -1  | <1         | -1.07E-03 |     | -5  | <1         | -2.93E-05 |
|     | 0   | 28.7       | -4.07E+00 |     | -4  | <1         | 1.42E-05  |
|     | 1   | <1         | -5.30E-02 |     | -3  | <1         | 1.18E-07  |
|     | 2   | 37.4       | 6.50E+00  |     | -2  | 3.1        | 1.35E-04  |
| 4   | -4  | 2.7        | 8.89E-03  |     | -1  | <1         | -9.25E-06 |
|     | -3  | <1         | 7.06E-04  |     | 0   | 1.2        | -9.95E-06 |
|     | -2  | <1         | 1.36E-03  |     | 1   | <1         | 1.42E-05  |
|     | -1  | <1         | 4.98E-04  |     | 2   | 6.3        | 2.71E-04  |
|     | 0   | 1.7        | -1.30E-03 |     | 3   | <1         | 1.45E-05  |
|     | 1   | <1         | -2.97E-04 |     | 4   | <1         | -1.99E-05 |
|     | 2   | 2.8        | -6.85E-03 | 5   | <1  | 3.48E-05   |           |
|     | 3   | <1         | -8.34E-04 | 6   | 2.7 | -1.74E-04  |           |
|     | 4   | 3.6        | -1.18E-02 |     |     |            |           |

**Table S16.** Crystal field parameters calculated for Cp\*<sub>2</sub>Dy(TIP) (**1-Dy**) at 200 K via the SINGLE\_ANISO program.

| $k$ | $q$ | Weight (%) | $B_q^k$   | $k$ | $q$ | Weight (%) | $B_q^k$   |
|-----|-----|------------|-----------|-----|-----|------------|-----------|
| 2   | -2  | 3.0        | -5.22E-01 | 6   | -6  | 2.2        | 1.39E-04  |
|     | -1  | <1         | 9.52E-03  |     | -5  | <1         | -5.30E-05 |
|     | 0   | 28.7       | -4.07E+00 |     | -4  | <1         | 1.25E-05  |
|     | 1   | <1         | -6.56E-02 |     | -3  | <1         | 7.43E-06  |
|     | 2   | 37.1       | 6.44E+00  |     | -2  | 2.9        | 1.25E-04  |
| 4   | -4  | 2.8        | 9.27E-03  |     | -1  | <1         | -7.21E-06 |
|     | -3  | <1         | -3.33E-04 |     | 0   | 1.2        | -9.76E-06 |
|     | -2  | <1         | 1.51E-03  |     | 1   | <1         | 1.28E-05  |
|     | -1  | <1         | 3.46E-04  |     | 2   | 6.7        | 2.85E-04  |
|     | 0   | 1.6        | -1.27E-03 |     | 3   | <1         | -1.34E-06 |
|     | 1   | <1         | -4.08E-04 |     | 4   | <1         | -2.37E-05 |
|     | 2   | 2.9        | -7.07E-03 | 5   | <1  | 2.81E-05   |           |
|     | 3   | <1         | -5.53E-04 | 6   | 2.6 | -1.65E-04  |           |
|     | 4   | 3.4        | -1.11E-02 |     |     |            |           |

**Table S17.** Crystal field parameters calculated for Cp\*<sub>2</sub>Dy(TIP) (**1-Dy**) at 300 K via the SINGLE\_ANISO program.

| <i>k</i> | <i>q</i> | Weight (%) | $B_q^k$   | <i>k</i> | <i>q</i> | Weight (%) | $B_q^k$   |
|----------|----------|------------|-----------|----------|----------|------------|-----------|
| 2        | -2       | 3.3        | -5.84E-01 | 6        | -6       | 2.0        | 1.29E-04  |
|          | -1       | <1         | -6.72E-03 |          | -5       | <1         | -2.41E-05 |
|          | 0        | 28.3       | -4.14E+00 |          | -4       | <1         | 1.45E-05  |
|          | 1        | <1         | -1.27E-01 |          | -3       | <1         | -4.71E-06 |
|          | 2        | 37.9       | 6.79E+00  |          | -2       | 2.8        | 1.21E-04  |
| 4        | -4       | 2.6        | 8.82E-03  |          | -1       | <1         | -8.46E-06 |
|          | -3       | <1         | 3.51E-04  |          | 0        | 1.1        | -9.16E-06 |
|          | -2       | <1         | 1.30E-03  |          | 1        | <1         | 1.95E-05  |
|          | -1       | <1         | 3.77E-04  |          | 2        | 6.6        | 2.92E-04  |
|          | 0        | 1.7        | -1.33E-03 |          | 3        | <1         | 6.23E-06  |
|          | 1        | <1         | -4.01E-04 |          | 4        | <1         | -3.21E-05 |
|          | 2        | 2.6        | -6.51E-03 | 5        | <1       | 3.61E-05   |           |
|          | 3        | <1         | -1.02E-03 | 6        | 2.5      | -1.61E-04  |           |
|          | 4        | 3.3        | -1.11E-02 |          |          |            |           |

**Table S18.** Crystal field parameters calculated for Cp\*<sub>2</sub>Dy(DMP) (**2-Dy**) via the SINGLE\_ANISO program.

| <i>k</i> | <i>q</i> | Weight (%) | $B_q^k$   | <i>k</i> | <i>q</i> | Weight (%) | $B_q^k$   |
|----------|----------|------------|-----------|----------|----------|------------|-----------|
| 2        | -2       | <1         | 3.13E-02  | 6        | -6       | <1         | 3.12E-05  |
|          | -1       | <1         | 2.75E-02  |          | -5       | <1         | 1.01E-04  |
|          | 0        | 23         | -3.84E+00 |          | -4       | <1         | -5.30E-06 |
|          | 1        | <1         | -3.42E-01 |          | -3       | <1         | -1.86E-05 |
|          | 2        | 46         | 9.38E+00  |          | -2       | 2          | 1.22E-04  |
| 4        | -4       | <1         | 3.82E-03  |          | -1       | <1         | -1.32E-05 |
|          | -3       | <1         | 4.65E-03  |          | 0        | 1          | -1.07E-05 |
|          | -2       | <1         | 1.09E-03  |          | 1        | <1         | 1.73E-05  |
|          | -1       | <1         | 2.75E-05  |          | 2        | 7          | 3.51E-04  |
|          | 0        | 2          | -1.85E-03 |          | 3        | <1         | 5.32E-06  |
|          | 1        | <1         | 1.35E-03  |          | 4        | 1          | -6.32E-05 |
|          | 2        | 2          | -5.54E-03 | 5        | <1       | 1.10E-04   |           |
|          | 3        | <1         | 4.33E-03  | 6        | 3        | -1.83E-04  |           |
|          | 4        | 5          | -1.77E-02 |          |          |            |           |

**Table S19.** Calculated average transition dipole moments for the eight lowest lying Kramers doublets with opposing magnetization ( $+l \rightarrow l-1$ ), and for excited states ( $l \rightarrow l+1$ ), ( $l \rightarrow l+2$ ), ( $l \rightarrow l+3$ ), ( $l \rightarrow l+4$ ) and ( $l \rightarrow l+5$ ) of  $\text{Cp}^*_2\text{Dy}(\text{TIP})$  (**1-Dy**) at 100 K.

| Through Barrier<br>( $+l \rightarrow -l$ )         |      |           | Through Excited States<br>( $+l \rightarrow l+1$ ) |      |           | Through Excited States<br>( $+l \rightarrow l+2$ ) |      |           |
|----------------------------------------------------|------|-----------|----------------------------------------------------|------|-----------|----------------------------------------------------|------|-----------|
| KD1                                                | KD2  | Magnitude | KD                                                 | KD+1 | Magnitude | KD                                                 | KD+2 | Magnitude |
| +1                                                 | -1   | 4.080E-03 | +1                                                 | +2   | 1.821E+00 | +1                                                 | +3   | 1.580E-01 |
| +2                                                 | -2   | 1.618E-01 | +1                                                 | -2   | 1.410E-03 | +1                                                 | -3   | 1.835E-01 |
| +3                                                 | -3   | 3.033E+00 | +2                                                 | +3   | 1.833E+00 | +2                                                 | +4   | 1.586E+00 |
| +4                                                 | -4   | 1.917E+00 | +2                                                 | -3   | 4.508E-01 | +2                                                 | -4   | 2.954E-01 |
| +5                                                 | -5   | 2.227E+00 | +3                                                 | +4   | 1.364E+00 | +3                                                 | +5   | 1.446E-01 |
| +6                                                 | -6   | 1.744E-01 | +3                                                 | -4   | 1.805E+00 | +3                                                 | -5   | 2.737E-01 |
| +7                                                 | -7   | 8.650E-01 | +4                                                 | +5   | 1.961E+00 | +4                                                 | +6   | 2.040E-01 |
| +8                                                 | -8   | 5.239E-01 | +4                                                 | -5   | 1.387E+00 | +4                                                 | -6   | 1.919E-01 |
|                                                    |      |           | +5                                                 | +6   | 1.958E+00 | +5                                                 | +7   | 1.764E-01 |
|                                                    |      |           | +5                                                 | -6   | 2.021E+00 | +5                                                 | -7   | 1.416E-01 |
|                                                    |      |           | +6                                                 | +7   | 2.331E+00 | +6                                                 | +8   | 4.458E-02 |
|                                                    |      |           | +6                                                 | -7   | 3.190E-01 | +6                                                 | -8   | 4.965E-01 |
|                                                    |      |           | +7                                                 | +8   | 2.590E-01 |                                                    |      |           |
|                                                    |      |           | +7                                                 | -8   | 1.658E+00 |                                                    |      |           |
| Through Excited States<br>( $+l \rightarrow l+3$ ) |      |           | Through Excited States<br>( $+l \rightarrow l+4$ ) |      |           | Through Excited States<br>( $+l \rightarrow l+5$ ) |      |           |
| KD                                                 | KD+3 | Magnitude | KD                                                 | KD+4 | Magnitude | KD                                                 | KD+5 | Magnitude |
| +1                                                 | +4   | 2.061E-01 | +1                                                 | +5   | 1.203E-01 | +1                                                 | +6   | 8.151E-02 |
| +1                                                 | -4   | 1.222E-01 | +1                                                 | -5   | 6.700E-02 | +1                                                 | -6   | 8.742E-02 |
| +2                                                 | +5   | 1.879E-01 | +2                                                 | +6   | 1.483E-01 | +2                                                 | +7   | 9.363E-02 |
| +2                                                 | -5   | 4.932E-01 | +2                                                 | -6   | 1.472E-01 | +2                                                 | -7   | 7.670E-02 |
| +3                                                 | +6   | 1.705E-01 | +3                                                 | +7   | 1.168E-01 | +3                                                 | +8   | 3.181E-02 |
| +3                                                 | -6   | 1.712E-01 | +3                                                 | -7   | 1.341E-01 | +3                                                 | -8   | 3.063E-02 |
| +4                                                 | +7   | 1.690E-01 | +4                                                 | +8   | 5.655E-02 |                                                    |      |           |
| +4                                                 | -7   | 1.718E-01 | +4                                                 | -8   | 5.288E-02 |                                                    |      |           |
| +5                                                 | +8   | 2.299E-01 |                                                    |      |           |                                                    |      |           |
| +5                                                 | -8   | 2.167E-01 |                                                    |      |           |                                                    |      |           |

**Table S20.** Calculated average transition dipole moments for the eight lowest lying Kramers doublets with opposing magnetization ( $+l \rightarrow l-1$ ), and for excited states ( $l \rightarrow l+1$ ), ( $l \rightarrow l+2$ ), ( $l \rightarrow l+3$ ), ( $l \rightarrow l+4$ ) and ( $l \rightarrow l+5$ ) of for  $\text{Cp}^*_2\text{Dy}(\text{TIP})$  (**1-Dy**) at 200 K.

| Through Barrier<br>( $+l \rightarrow -l$ )         |      |           | Through Excited States<br>( $+l \rightarrow l+1$ ) |      |           | Through Excited States<br>( $+l \rightarrow l+2$ ) |      |           |
|----------------------------------------------------|------|-----------|----------------------------------------------------|------|-----------|----------------------------------------------------|------|-----------|
| KD1                                                | KD2  | Magnitude | KD                                                 | KD+1 | Magnitude | KD                                                 | KD+2 | Magnitude |
| +1                                                 | -1   | 4.040E-03 | +1                                                 | +2   | 1.825E+00 | +1                                                 | +3   | 1.555E-01 |
| +2                                                 | -2   | 1.388E-01 | +1                                                 | -2   | 2.350E-03 | +1                                                 | -3   | 1.658E-01 |
| +3                                                 | -3   | 3.078E+00 | +2                                                 | +3   | 1.780E+00 | +2                                                 | +4   | 1.624E+00 |
| +4                                                 | -4   | 1.901E+00 | +2                                                 | -3   | 4.126E-01 | +2                                                 | -4   | 2.879E-01 |
| +5                                                 | -5   | 2.249E+00 | +3                                                 | +4   | 1.306E+00 | +3                                                 | +5   | 1.466E-01 |
| +6                                                 | -6   | 1.575E-01 | +3                                                 | -4   | 1.765E+00 | +3                                                 | -5   | 2.882E-01 |
| +7                                                 | -7   | 8.808E-01 | +4                                                 | +5   | 1.994E+00 | +4                                                 | +6   | 2.238E-01 |
| +8                                                 | -8   | 3.308E-01 | +4                                                 | -5   | 1.371E+00 | +4                                                 | -6   | 2.053E-01 |
|                                                    |      |           | +5                                                 | +6   | 1.971E+00 | +5                                                 | +7   | 1.900E-01 |
|                                                    |      |           | +5                                                 | -6   | 2.016E+00 | +5                                                 | -7   | 1.424E-01 |
|                                                    |      |           | +6                                                 | +7   | 2.337E+00 | +6                                                 | +8   | 2.736E-02 |
|                                                    |      |           | +6                                                 | -7   | 3.215E-01 | +6                                                 | -8   | 5.074E-01 |
|                                                    |      |           | +7                                                 | +8   | 2.490E-01 |                                                    |      |           |
|                                                    |      |           | +7                                                 | -8   | 1.664E+00 |                                                    |      |           |
| Through Excited States<br>( $+l \rightarrow l+3$ ) |      |           | Through Excited States<br>( $+l \rightarrow l+4$ ) |      |           | Through Excited States<br>( $+l \rightarrow l+5$ ) |      |           |
| KD                                                 | KD+3 | Magnitude | KD                                                 | KD+4 | Magnitude | KD                                                 | KD+5 | Magnitude |
| +1                                                 | +4   | 2.079E-01 | +1                                                 | +5   | 1.207E-01 | +1                                                 | +6   | 8.639E-02 |
| +1                                                 | -4   | 1.095E-01 | +1                                                 | -5   | 6.339E-02 | +1                                                 | -6   | 8.609E-02 |
| +2                                                 | +5   | 1.947E-01 | +2                                                 | +6   | 1.467E-01 | +2                                                 | +7   | 9.547E-02 |
| +2                                                 | -5   | 4.962E-01 | +2                                                 | -6   | 1.456E-01 | +2                                                 | -7   | 7.596E-02 |
| +3                                                 | +6   | 1.809E-01 | +3                                                 | +7   | 1.193E-01 | +3                                                 | +8   | 3.244E-02 |
| +3                                                 | -6   | 1.811E-01 | +3                                                 | -7   | 1.379E-01 | +3                                                 | -8   | 3.107E-02 |
| +4                                                 | +7   | 1.710E-01 | +4                                                 | +8   | 5.661E-02 |                                                    |      |           |
| +4                                                 | -7   | 1.717E-01 | +4                                                 | -8   | 5.406E-02 |                                                    |      |           |
| +5                                                 | +8   | 2.248E-01 |                                                    |      |           |                                                    |      |           |
| +5                                                 | -8   | 2.151E-01 |                                                    |      |           |                                                    |      |           |

**Table S21.** Calculated average transition dipole moments for the eight lowest lying Kramers doublets with opposing magnetization ( $+l \rightarrow l-1$ ), and for excited states ( $l \rightarrow l+1$ ), ( $l \rightarrow l+2$ ), ( $l \rightarrow l+3$ ), ( $l \rightarrow l+4$ ) and ( $l \rightarrow l+5$ ) of for  $\text{Cp}^*_2\text{Dy}(\text{TIP})$  (**1-Dy**) at 300 K.

| Through Barrier<br>( $+l \rightarrow -l$ )         |      |           | Through Excited States<br>( $+l \rightarrow l+1$ ) |      |           | Through Excited States<br>( $+l \rightarrow l+2$ ) |      |           |
|----------------------------------------------------|------|-----------|----------------------------------------------------|------|-----------|----------------------------------------------------|------|-----------|
| KD1                                                | KD2  | Magnitude | KD                                                 | KD+1 | Magnitude | KD                                                 | KD+2 | Magnitude |
| +1                                                 | -1   | 3.610E-03 | +1                                                 | +2   | 1.832E+00 | +1                                                 | +3   | 1.694E-01 |
| +2                                                 | -2   | 2.018E-01 | +1                                                 | -2   | 3.280E-03 | +1                                                 | -3   | 1.960E-01 |
| +3                                                 | -3   | 3.047E+00 | +2                                                 | +3   | 1.840E+00 | +2                                                 | +4   | 1.582E+00 |
| +4                                                 | -4   | 1.945E+00 | +2                                                 | -3   | 5.098E-01 | +2                                                 | -4   | 2.907E-01 |
| +5                                                 | -5   | 2.236E+00 | +3                                                 | +4   | 1.345E+00 | +3                                                 | +5   | 1.509E-01 |
| +6                                                 | -6   | 5.228E-01 | +3                                                 | -4   | 1.807E+00 | +3                                                 | -5   | 2.930E-01 |
| +7                                                 | -7   | 6.979E-01 | +4                                                 | +5   | 1.958E+00 | +4                                                 | +6   | 2.167E-01 |
| +8                                                 | -8   | 5.220E-01 | +4                                                 | -5   | 1.384E+00 | +4                                                 | -6   | 1.712E-01 |
|                                                    |      |           | +5                                                 | +6   | 1.944E+00 | +5                                                 | +7   | 1.751E-01 |
|                                                    |      |           | +5                                                 | -6   | 2.022E+00 | +5                                                 | -7   | 1.386E-01 |
|                                                    |      |           | +6                                                 | +7   | 2.337E+00 | +6                                                 | +8   | 2.898E-02 |
|                                                    |      |           | +6                                                 | -7   | 2.407E-01 | +6                                                 | -8   | 4.639E-01 |
|                                                    |      |           | +7                                                 | +8   | 2.173E-01 |                                                    |      |           |
|                                                    |      |           | +7                                                 | -8   | 1.673E+00 |                                                    |      |           |
| Through Excited States<br>( $+l \rightarrow l+3$ ) |      |           | Through Excited States<br>( $+l \rightarrow l+4$ ) |      |           | Through Excited States<br>( $+l \rightarrow l+5$ ) |      |           |
| KD                                                 | KD+3 | Magnitude | KD                                                 | KD+4 | Magnitude | KD                                                 | KD+5 | Magnitude |
| +1                                                 | +4   | 2.189E-01 | +1                                                 | +5   | 1.149E-01 | +1                                                 | +6   | 9.137E-02 |
| +1                                                 | -4   | 1.116E-01 | +1                                                 | -5   | 7.174E-02 | +1                                                 | -6   | 7.868E-02 |
| +2                                                 | +5   | 1.971E-01 | +2                                                 | +6   | 1.372E-01 | +2                                                 | +7   | 8.742E-02 |
| +2                                                 | -5   | 4.934E-01 | +2                                                 | -6   | 1.498E-01 | +2                                                 | -7   | 7.340E-02 |
| +3                                                 | +6   | 1.740E-01 | +3                                                 | +7   | 1.186E-01 | +3                                                 | +8   | 3.152E-02 |
| +3                                                 | -6   | 1.639E-01 | +3                                                 | -7   | 1.301E-01 | +3                                                 | -8   | 3.031E-02 |
| +4                                                 | +7   | 1.662E-01 | +4                                                 | +8   | 5.678E-02 |                                                    |      |           |
| +4                                                 | -7   | 1.706E-01 | +4                                                 | -8   | 4.955E-02 |                                                    |      |           |
| +5                                                 | +8   | 2.158E-01 |                                                    |      |           |                                                    |      |           |
| +5                                                 | -8   | 2.021E-01 |                                                    |      |           |                                                    |      |           |



**Table S22.** Calculated average transition dipole moments for the eight lowest lying Kramers doublets with opposing magnetization ( $+l \rightarrow l-1$ ), and for excited states ( $l \rightarrow l+1$ ), ( $l \rightarrow l+2$ ), ( $l \rightarrow l+3$ ), ( $l \rightarrow l+4$ ) and ( $l \rightarrow l+5$ ) of Cp\*<sub>2</sub>Dy(DMP) (**2-Dy**).

| Through Barrier<br>( $+l \rightarrow -l$ )         |      |           | Through Excited States<br>( $+l \rightarrow l+1$ ) |      |           | Through Excited States<br>( $+l \rightarrow l+2$ ) |      |           |
|----------------------------------------------------|------|-----------|----------------------------------------------------|------|-----------|----------------------------------------------------|------|-----------|
| KD1                                                | KD2  | Magnitude | KD                                                 | KD+1 | Magnitude | KD                                                 | KD+2 | Magnitude |
| +1                                                 | -1   | 1.158E-01 | +1                                                 | +2   | 1.569E+00 | +1                                                 | +3   | 1.236E+00 |
| +2                                                 | -2   | 2.722E+00 | +1                                                 | -2   | 3.971E-01 | +1                                                 | -3   | 2.646E-01 |
| +3                                                 | -3   | 1.029E+00 | +2                                                 | +3   | 1.402E+00 | +2                                                 | +4   | 4.072E-01 |
| +4                                                 | -4   | 2.258E+00 | +2                                                 | -3   | 1.770E+00 | +2                                                 | -4   | 3.707E-01 |
| +5                                                 | -5   | 1.976E+00 | +3                                                 | +4   | 2.263E+00 | +3                                                 | +5   | 3.447E-01 |
| +6                                                 | -6   | 1.635E+00 | +3                                                 | -4   | 1.354E+00 | +3                                                 | -5   | 3.133E-01 |
| +7                                                 | -7   | 3.623E-01 | +4                                                 | +5   | 1.781E+00 | +4                                                 | +6   | 6.392E-02 |
| +8                                                 | -8   | 3.369E-01 | +4                                                 | -5   | 1.705E+00 | +4                                                 | -6   | 1.057E-01 |
|                                                    |      |           | +5                                                 | +6   | 1.570E+00 | +5                                                 | +7   | 5.401E-02 |
|                                                    |      |           | +5                                                 | -6   | 2.093E+00 | +5                                                 | -7   | 1.017E-01 |
|                                                    |      |           | +6                                                 | +7   | 2.139E+00 | +6                                                 | +8   | 2.779E-01 |
|                                                    |      |           | +6                                                 | -7   | 7.968E-01 | +6                                                 | -8   | 1.118E-01 |
|                                                    |      |           | +7                                                 | +8   | 1.687E+00 |                                                    |      |           |
|                                                    |      |           | +7                                                 | -8   | 8.369E-02 |                                                    |      |           |
| Through Excited States<br>( $+l \rightarrow l+3$ ) |      |           | Through Excited States<br>( $+l \rightarrow l+4$ ) |      |           | Through Excited States<br>( $+l \rightarrow l+5$ ) |      |           |
| KD                                                 | KD+3 | Magnitude | KD                                                 | KD+4 | Magnitude | KD                                                 | KD+5 | Magnitude |
| +1                                                 | +4   | 2.527E-01 | +1                                                 | +5   | 1.189E-01 | +1                                                 | +6   | 1.160E-01 |
| +1                                                 | -4   | 2.053E-01 | +1                                                 | -5   | 9.017E-02 | +1                                                 | -6   | 7.023E-02 |
| +2                                                 | +5   | 3.512E-01 | +2                                                 | +6   | 1.344E-01 | +2                                                 | +7   | 7.323E-02 |
| +2                                                 | -5   | 9.233E-02 | +2                                                 | -6   | 1.678E-01 | +2                                                 | -7   | 7.240E-02 |
| +3                                                 | +6   | 7.176E-02 | +3                                                 | +7   | 9.934E-02 | +3                                                 | +8   | 3.137E-02 |
| +3                                                 | -6   | 6.191E-02 | +3                                                 | -7   | 8.091E-02 | +3                                                 | -8   | 3.535E-02 |
| +4                                                 | +7   | 2.161E-01 | +4                                                 | +8   | 4.797E-02 |                                                    |      |           |
| +4                                                 | -7   | 2.084E-01 | +4                                                 | -8   | 5.024E-02 |                                                    |      |           |
| +5                                                 | +8   | 1.773E-01 |                                                    |      |           |                                                    |      |           |
| +5                                                 | -8   | 2.308E-01 |                                                    |      |           |                                                    |      |           |

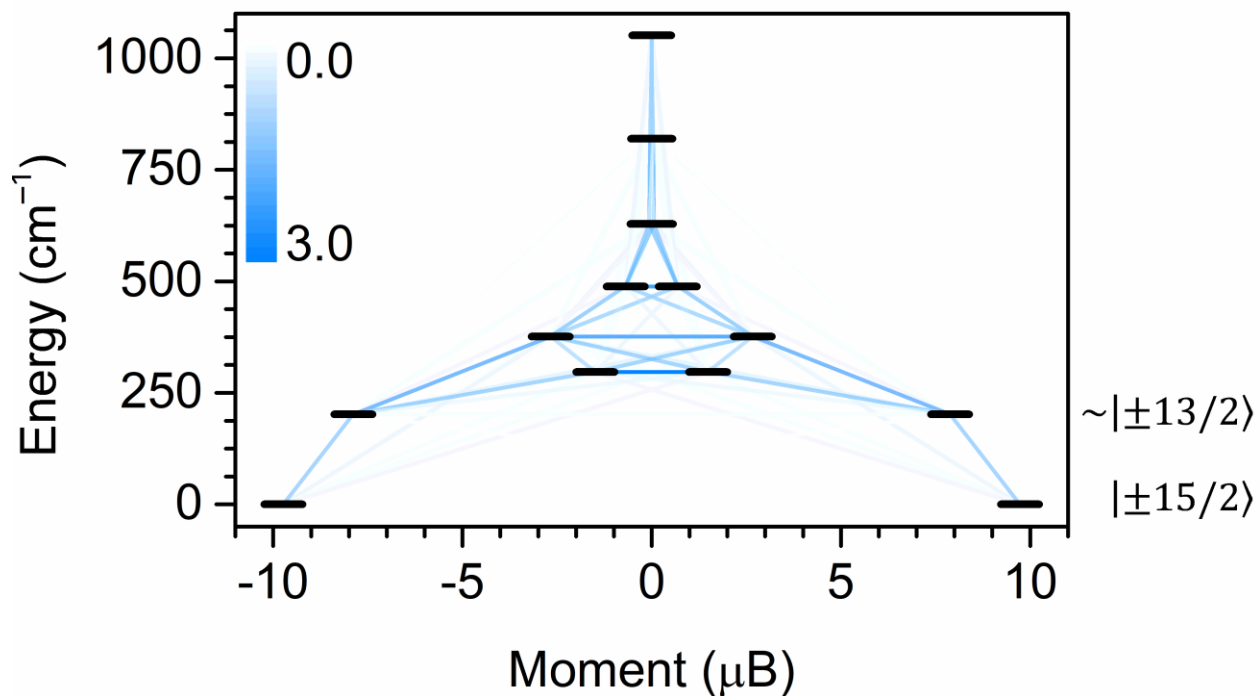

**Figure S62.** Calculated full relaxation barrier for Cp\*<sub>2</sub>Dy(TIP) (**1-Dy**) at 100 K. Solid lines represent possible relaxation processes as indicated by calculated transition magnetic dipole moments, where dark blue coloration represents most probable transitions and faded blue indicates vanishing probabilities. The numbers on the right are given for the primary  $M_J$  state comprising the wave function for each state. States above KD2 are heavily mixed and therefore no  $M_J$  states are assigned.

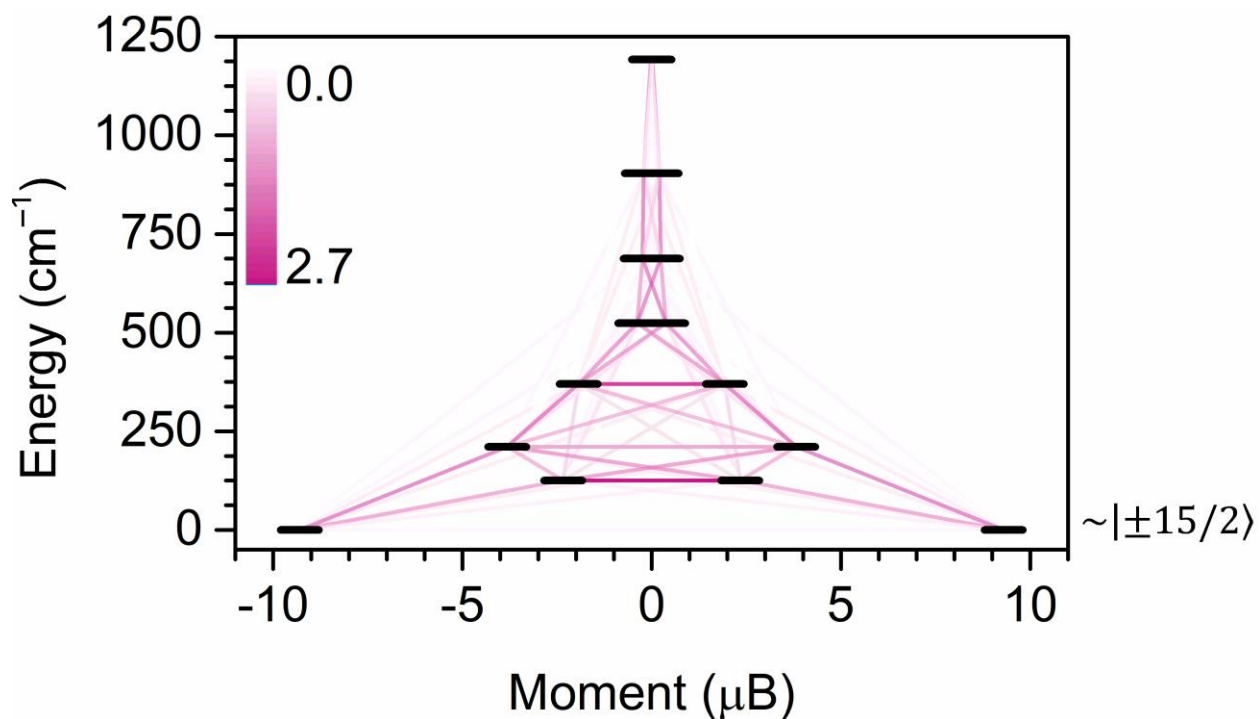

**Figure S63.** Calculated full relaxation barrier for Cp\*<sub>2</sub>Dy(DMP) (**2-Dy**). Solid lines represent possible relaxation processes as indicated by calculated transition magnetic dipole moments, where dark purple coloration represents most probable transitions and faded blue indicates vanishing probabilities. The numbers on the right are given for the primary  $M_J$  state comprising the wave function for each state. States above KD1 are heavily mixed and therefore no  $M_J$  states are assigned.

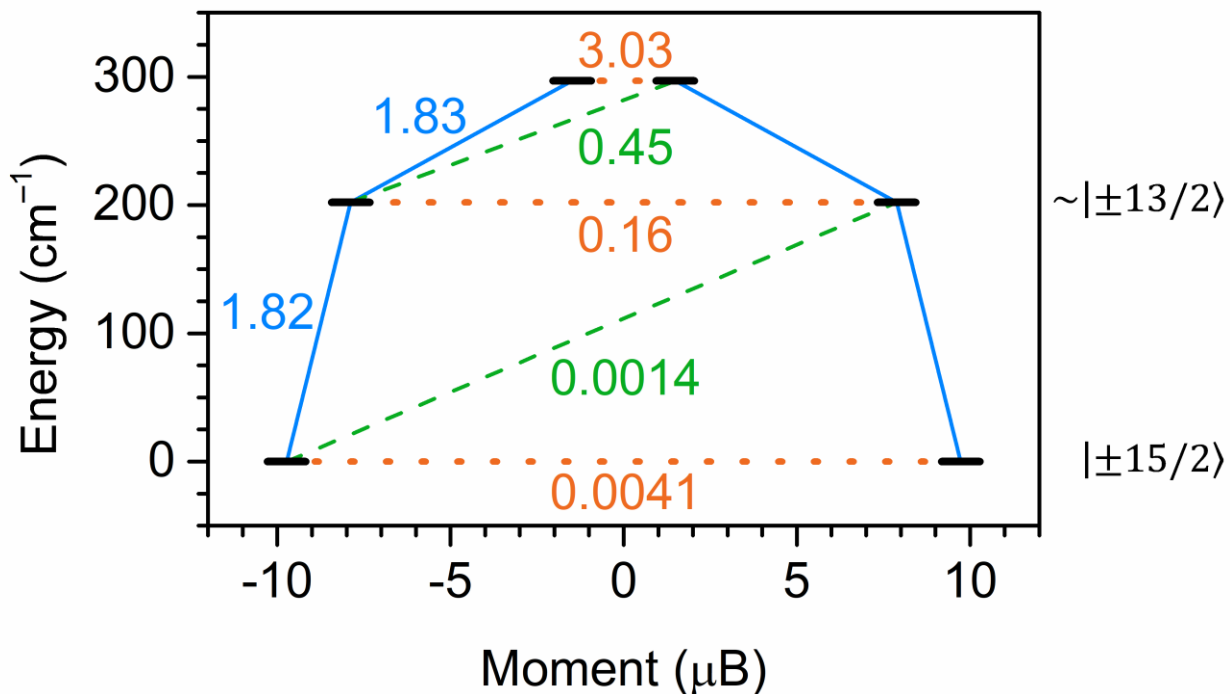

**Figure S64.** Estimated relaxation barrier comprising the four lowest-lying Kramers doublets with relaxation pathways shown for Cp\*<sub>2</sub>Dy(TIP) (**1-Dy**) at 100 K. Solid blue and dashed green lines indicate Orbach processes, orange dotted line indicates quantum tunneling (QTM)/thermally activated QTM pathways. Values next to the arrows correspond to the respective transition magnetic moment matrix elements. The numbers on the right are given for the primary  $M_J$  state comprising the wave function for each state.

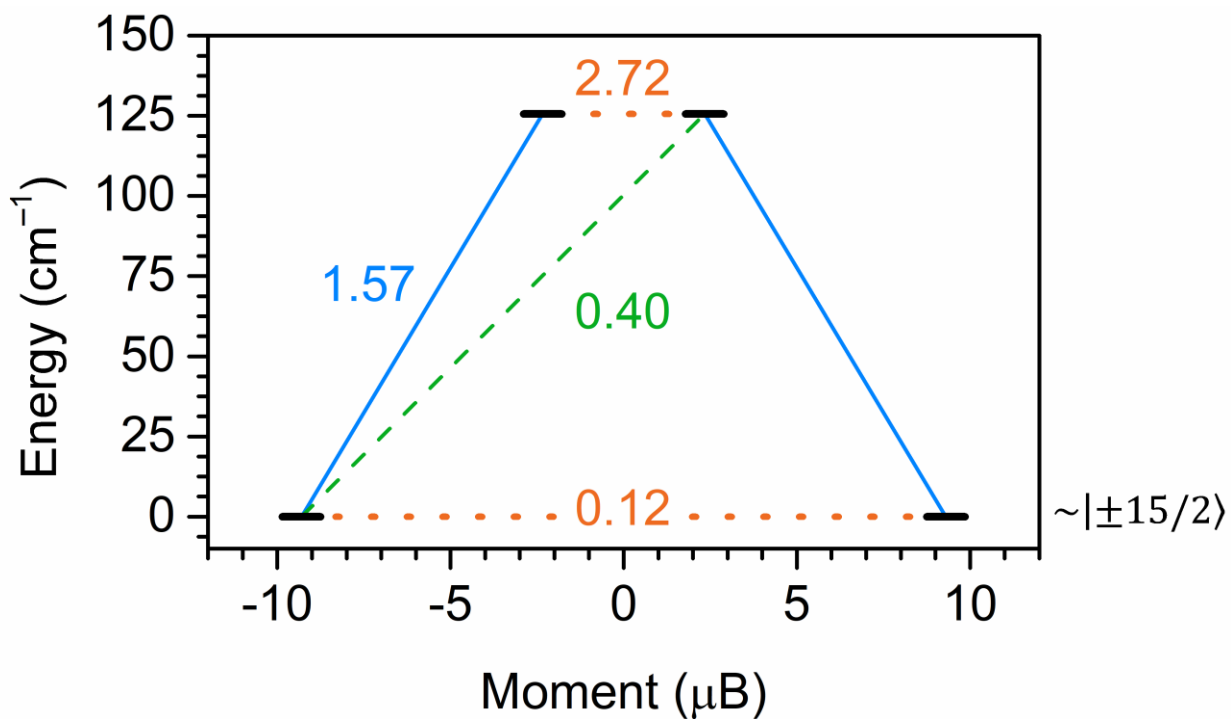

**Figure S65.** Estimated relaxation barrier comprising the two lowest-lying Kramers doublets with relaxation pathways shown for Cp\*<sub>2</sub>Dy(DMP) (**2-Dy**). Solid blue and dashed green lines indicate Orbach processes, orange dotted line indicates quantum tunneling (QTM)/thermally activated QTM pathways. Values next to the arrows correspond to the respective transition magnetic moment matrix elements. The numbers on the right are given for the primary  $M_J$  state comprising the wave function for each state.

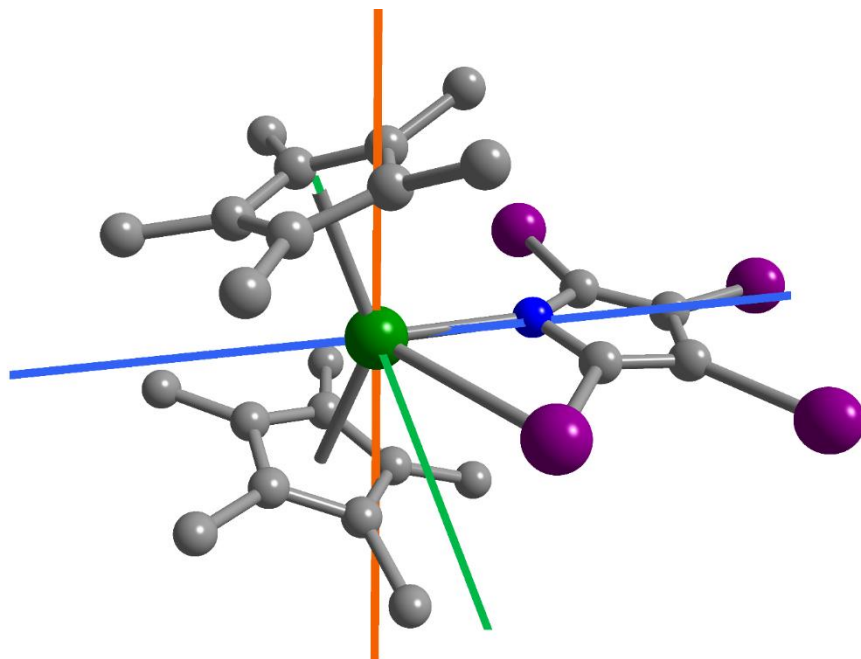

**Figure S66.** Plot of the  $g$ -tensor components calculated for the  $|\pm 15/2\rangle$  ground state Kramers doublet of Cp\*<sub>2</sub>Dy(TIP) (**1-Dy**) at 100 K. Color code:  $g_x$ (green),  $g_y$  (blue) and  $g_z$  (orange) with respective compositions 0.0084 ( $g_x$ ), 0.0161 ( $g_y$ ) and 19.4562 ( $g_z$ ).

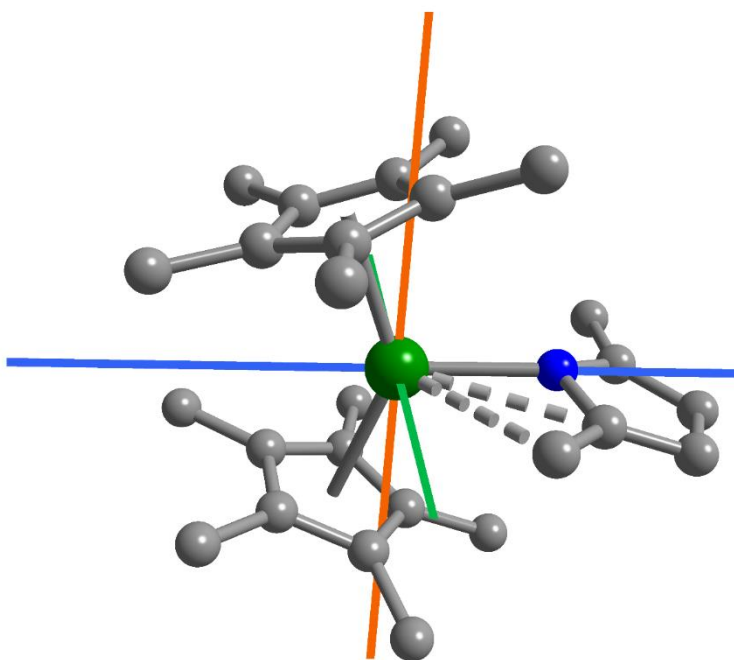

**Figure S67.** Plot of the  $g$ -tensor components calculated for the  $|\pm 15/2\rangle$  ground state Kramers doublet of Cp\*<sub>2</sub>Dy(DMP) (**2-Dy**). Color code:  $g_x$  (green),  $g_y$  (blue) and  $g_z$  (orange) with respective compositions 0.1872 ( $g_x$ ), 0.5077 ( $g_y$ ) and 18.5949 ( $g_z$ ).

**Table S23.** Spin-orbit coupling constants ( $\zeta$ ) and Slater Condon parameters ( $F^2$ ,  $F^4$  and  $F^6$ , interelectronic repulsion) derived via *ab initio* ligand field (AILFT) analysis from CASSCF/NEVPT2 calculations of Cp\*<sub>2</sub>Dy(TIP) (**1-Dy**) at 100 K and Cp\*<sub>2</sub>Dy(DMP) (**2-Dy**). For comparison, the free Dy<sup>III</sup> ion was calculated, using the same methodology as described for **1-Dy** and **2-Dy** in the method description.

| Complex                              | Slater Condon Parameters (cm <sup>-1</sup> ) |                |                | $\zeta$ (cm <sup>-1</sup> ) |
|--------------------------------------|----------------------------------------------|----------------|----------------|-----------------------------|
|                                      | F <sup>2</sup>                               | F <sup>4</sup> | F <sup>6</sup> |                             |
| <b>1-Dy</b><br>(100 K)               | 122933.4                                     | 77132.5        | 55520.5        | 1929.2                      |
| <b>1-Dy</b><br>(200 K)               | 122936.8                                     | 77135.3        | 55522.3        | 1929.2                      |
| <b>1-Dy</b><br>(300 K)               | 122950.3                                     | 77143.6        | 55528.4        | 1929.4                      |
| <b>2-Dy</b>                          | 122911.3                                     | 77088.2        | 55501.1        | 1928.9                      |
| Free Dy <sup>III</sup><br>ion        | 124143.1                                     | 77935.5        | 56082.0        | 1941.5                      |
| <b>Nephelauxetic contraction (%)</b> |                                              |                |                |                             |
| <b>1-Dy</b><br>(100 K)               | 0.97                                         | 1.0            | 1.0            | 0.6                         |
| <b>1-Dy</b><br>(200 K)               | 0.97                                         | 1.0            | 1.0            | 0.6                         |
| <b>1-Dy</b><br>(300 K)               | 0.96                                         | 1.0            | 1.0            | 0.6                         |
| <b>2-Dy</b>                          | 0.99                                         | 1.1            | 1.0            | 0.6                         |

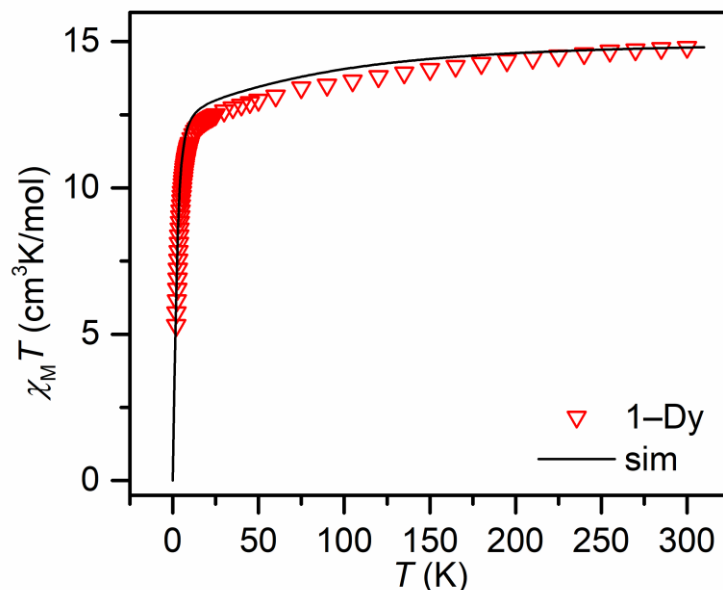

**Figure S68.** Variable-temperature dc magnetic susceptibility data ( $\chi_M T$  vs.  $T$ ) for  $\text{Cp}^*_2\text{Dy}(\text{TIP})$  (**1-Dy**) under a 1.0 T applied dc field (red triangles). Solid black line represents the calculated values for **1-Dy**. Calculated  $\chi_M T$  values were scaled to match the experimental  $\chi_M T$  value at room temperature.

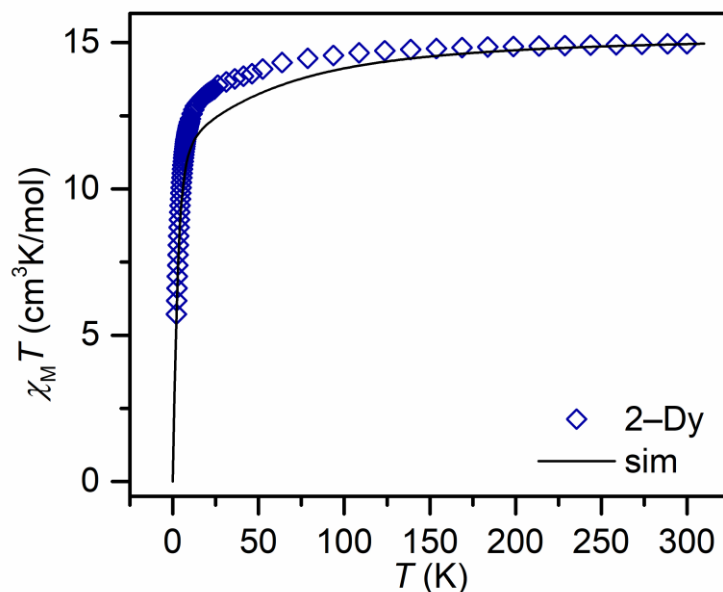

**Figure S69.** Variable-temperature dc magnetic susceptibility data ( $\chi_M T$  vs.  $T$ ) for  $\text{Cp}^*_2\text{Dy}(\text{DMP})$  (**2-Dy**) under a 1.0 T applied dc field (dark blue diamonds). Solid black line represents the calculated values for **2-Dy**. Calculated  $\chi_M T$  values were scaled to match the experimental  $\chi_M T$  value at room temperature.



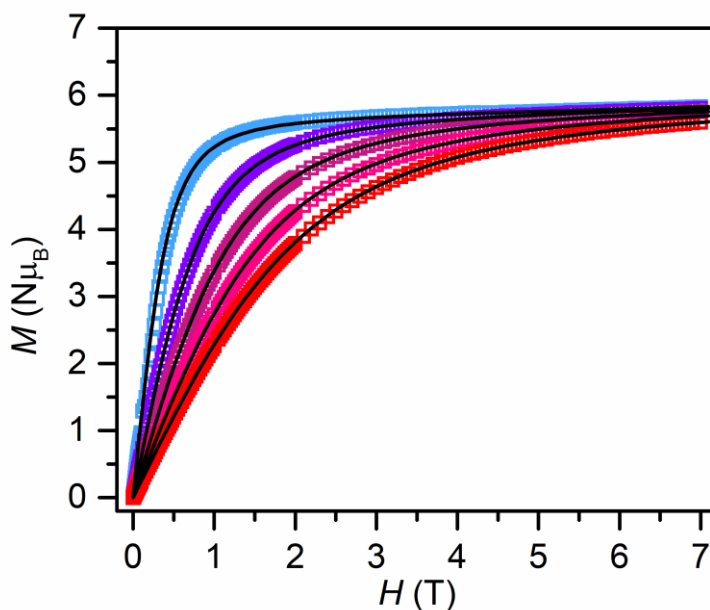

**Figure S70.** Field-dependent magnetization data for  $\text{Cp}^*_2\text{Dy}(\text{TIP})$  (**1-Dy**) at 2 K, 4 K, 6 K, 8 K, and 10 K. Solid black lines represent *ab initio* calculated  $M$  values (obtained from optimized crystal coordinates of the structure collected at 100 K). Calculated  $M$  values were scaled to match the experimental maximum  $M$  value.

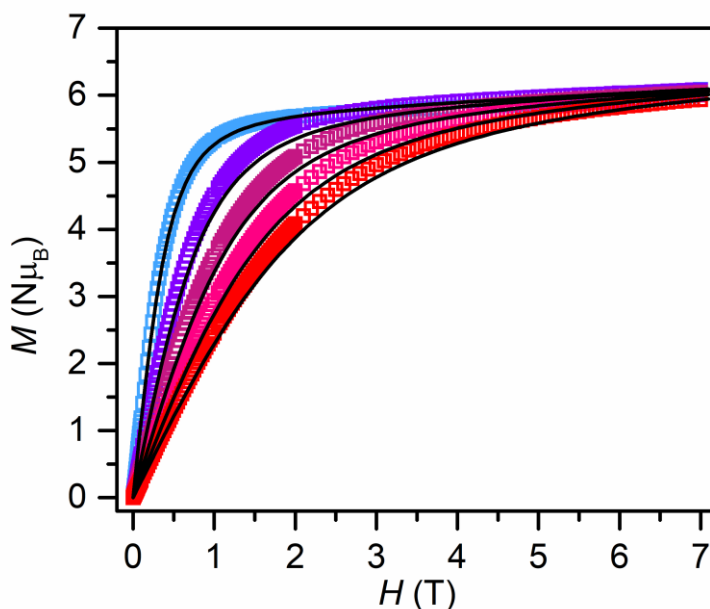

**Figure S71.** Field-dependent magnetization data for  $\text{Cp}^*_2\text{Dy}(\text{DMP})$  (**2-Dy**) at 2 K, 4 K, 6 K, 8 K, and 10 K. Solid black lines represent *ab initio* calculated  $M$  values (obtained from optimized crystal coordinates of the structure collected at 100 K). Calculated  $M$  values were scaled to match the experimental maximum  $M$  value.

## DFT Calculations

### Method for Estimating $pK_a$ values of Heterocycles

The  $pK_a$  values for TIPH, H-pyrrole, and DMPH heterocycles were calculated via the Gibbs free energy for the acid, its conjugate base in both the gas phase and including solvation effects. This procedure has been outlined elsewhere,<sup>16-18</sup> and follows the thermodynamic cycle presented below:

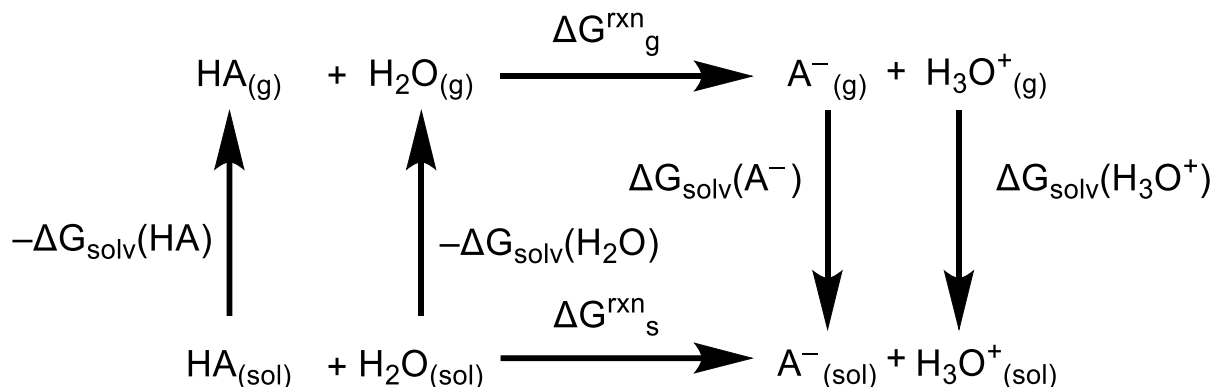

The value of  $\Delta G^{\text{rxn}}_s$  can subsequently be determined using:

$$\Delta G_s^{\text{rxn}} = \Delta G_g^{\text{rxn}} + \Delta G_{\text{solv}}(\text{A}^-) + \Delta G_{\text{solv}}(\text{H}_3\text{O}^+) - \Delta G_{\text{solv}}(\text{HA}) - \Delta G_{\text{solv}}(\text{H}_2\text{O})$$

The resulting  $\Delta G^{\text{rxn}}_s$  can then be used to solve for  $pK_a$  using the following relationship:

$$pK_a = \frac{\Delta G_s^{\text{rxn}}}{1.364} - \log[\text{H}_2\text{O}]$$

Where the concentration of water is 55.49 M. To account for issues regarding the solvation free energy of the hydronium ion, the determined  $pK_a$  must be corrected:

$$pK_a^{\text{corr}} = pK_a^{\text{uncorr}} - 4.54$$

**Table S24.** Computed Gibbs free energies (kcal mol<sup>-1</sup>) and p*K*<sub>a</sub> values for the deprotonation of TIPH, H–pyrrole, and DMPH under both gaseous and solvated conditions. All calculations were completed using the CAMB3LYP functional at the def2–TZVP level. A H<sub>2</sub>O CPCM solvent model was included for the solvated reaction energies.

|                                                                                     | $\Delta G^{\text{rxn}}_{\text{g}}$ | $\Delta G^{\text{rxn}}_{\text{s}}$ | Uncorrected<br>p <i>K</i> <sub>a</sub> | Corrected<br>p <i>K</i> <sub>a</sub> |
|-------------------------------------------------------------------------------------|------------------------------------|------------------------------------|----------------------------------------|--------------------------------------|
| H-TIP + H <sub>2</sub> O → TIP <sup>-</sup> + H <sub>3</sub> O <sup>+</sup>         | 159.02                             | 17.02                              | 10.73                                  | 6.19                                 |
| H-Pyrrole + H <sub>2</sub> O → Pyrrole <sup>-</sup> + H <sub>3</sub> O <sup>+</sup> | 196.85                             | 40.55                              | 27.99                                  | 23.45                                |
| H-DMP + H <sub>2</sub> O → DMP <sup>-</sup> + H <sub>3</sub> O <sup>+</sup>         | 196.08                             | 37.35                              | 25.64                                  | 21.10                                |

**Table S25.** Computed energies of solvation (kcal mol<sup>-1</sup>) of TIPH, H–pyrrole, DMPH, H<sub>3</sub>O<sup>+</sup>, and their conjugate bases. All calculations were completed using the CAMB3LYP functional at the def2–TZVP level. A H<sub>2</sub>O CPCM solvent model was included for the solvated reaction energies.

|                               | $\Delta G_{\text{s}}$ |
|-------------------------------|-----------------------|
| H-TIP                         | -4.28                 |
| TIP <sup>-</sup>              | -42.30                |
| H-DMP                         | -3.90                 |
| DMP <sup>-</sup>              | -56.43                |
| H-Pyrrole                     | -4.04                 |
| Pyrrole <sup>-</sup>          | -59.55                |
| H <sub>2</sub> O              | -110.3                |
| H <sub>3</sub> O <sup>+</sup> | -6.32                 |

**Table S26.** Computed and average experimental bond metrics of Cp\*<sub>2</sub>Y(TIP), **1–Y** with six different functionals using the def2–SVP basis set and a 28 electron ECP on Y and I.

|                                    | Experimental (Å) | Calculated |        |        |        |        |               |
|------------------------------------|------------------|------------|--------|--------|--------|--------|---------------|
|                                    |                  | B3LYP      | CAM    | M06    | PBE0   | TPSS   | TPSSh         |
| Distances (Å)                      |                  |            |        |        |        |        |               |
| Y–C* <sub>avg</sub>                | 2.643            | 2.660      | 2.645  | 2.642  | 2.635  | 2.646  | 2.640         |
| Y–C <sup>†</sup> <sub>avg</sub>    | 2.642            | 2.662      | 2.645  | 2.637  | 2.637  | 2.648  | 2.642         |
| Y–N <sub>py</sub>                  | 2.376            | 2.385      | 2.375  | 2.371  | 2.375  | 2.378  | 2.375         |
| N <sub>N1</sub> –C <sub>C21</sub>  | 1.364            | 1.361      | 1.355  | 1.357  | 1.355  | 1.369  | 1.363         |
| N <sub>N1</sub> –C <sub>C24</sub>  | 1.370            | 1.361      | 1.355  | 1.355  | 1.355  | 1.369  | 1.363         |
| C <sub>C21</sub> –C <sub>C22</sub> | 1.385            | 1.383      | 1.376  | 1.379  | 1.380  | 1.389  | 1.384         |
| C <sub>C22</sub> –C <sub>C23</sub> | 1.417            | 1.425      | 1.418  | 1.416  | 1.417  | 1.427  | 1.423         |
| C <sub>C23</sub> –C <sub>C24</sub> | 1.390            | 1.389      | 1.382  | 1.385  | 1.386  | 1.396  | 1.391         |
| C <sub>C21</sub> –I <sub>I1</sub>  | 2.086            | 2.104      | 2.085  | 2.089  | 2.079  | 2.103  | 2.093         |
| C <sub>C22</sub> –I <sub>I2</sub>  | 2.060            | 2.084      | 2.066  | 2.064  | 2.057  | 2.077  | 2.070         |
| C <sub>C23</sub> –I <sub>I3</sub>  | 2.063            | 2.086      | 2.069  | 2.066  | 2.059  | 2.081  | 2.072         |
| C <sub>C24</sub> –I <sub>I4</sub>  | 2.077            | 2.094      | 2.076  | 2.078  | 2.069  | 2.090  | 2.082         |
|                                    | MD               | 0.0125     | 0.0051 | 0.0048 | 0.0057 | 0.0085 | <b>0.0043</b> |
|                                    | MSE              | 2.2E-4     | 4.5E-5 | 3.6E-5 | 4.8E-5 | 1.1E-4 | <b>3.0E-5</b> |
|                                    | RMSE             | 1.5E-2     | 6.7E-3 | 6.0E-3 | 6.9E-3 | 1.0E-2 | <b>5.4E-3</b> |
|                                    | MAPE             | 0.61%      | 0.33%  | 0.29%  | 0.33%  | 0.45%  | <b>0.24%</b>  |

C\*<sub>avg</sub> = Average Y–C (Cp\*<sub>1</sub>) distances.

C<sup>†</sup><sub>avg</sub> = Average Y–C (Cp\*<sub>2</sub>) distances.

**Table S27.** Computed and average experimental bond metrics of Cp\*<sub>2</sub>Y(TIP), **1–Y** with six different functionals using the def2–SVP basis set and a 28 electron ECP on Y and I. Relevant atoms selected to better gauge the metal pyrrole interaction.

|                                    | Experimental (Å) | Calculated |        |        |        |        |               |
|------------------------------------|------------------|------------|--------|--------|--------|--------|---------------|
|                                    |                  | B3LYP      | CAM    | M06    | PBE0   | TPSS   | TPSSh         |
| Distances (Å)                      |                  |            |        |        |        |        |               |
| Y–N <sub>py</sub>                  | 2.376            | 2.385      | 2.375  | 2.371  | 2.375  | 2.378  | 2.375         |
| N <sub>N1</sub> –C <sub>C21</sub>  | 1.364            | 1.361      | 1.355  | 1.357  | 1.355  | 1.369  | 1.363         |
| N <sub>N1</sub> –C <sub>C24</sub>  | 1.370            | 1.361      | 1.355  | 1.355  | 1.355  | 1.369  | 1.363         |
| C <sub>C21</sub> –C <sub>C22</sub> | 1.385            | 1.383      | 1.376  | 1.379  | 1.380  | 1.389  | 1.384         |
| C <sub>C22</sub> –C <sub>C23</sub> | 1.417            | 1.425      | 1.418  | 1.416  | 1.417  | 1.427  | 1.423         |
| C <sub>C23</sub> –C <sub>C24</sub> | 1.390            | 1.389      | 1.382  | 1.385  | 1.386  | 1.396  | 1.391         |
| C <sub>C21</sub> –I <sub>I1</sub>  | 2.086            | 2.104      | 2.085  | 2.089  | 2.079  | 2.103  | 2.093         |
| C <sub>C22</sub> –I <sub>I2</sub>  | 2.060            | 2.084      | 2.066  | 2.064  | 2.057  | 2.077  | 2.070         |
| C <sub>C23</sub> –I <sub>I3</sub>  | 2.063            | 2.086      | 2.069  | 2.066  | 2.059  | 2.081  | 2.072         |
| C <sub>C24</sub> –I <sub>I4</sub>  | 2.077            | 2.094      | 2.076  | 2.078  | 2.069  | 2.090  | 2.082         |
|                                    | MD               | 0.0114     | 0.0057 | 0.0050 | 0.0056 | 0.0093 | <b>0.0048</b> |
|                                    | MSE              | 2.E-04     | 5.3E-5 | 4.0E-5 | 4.9E-5 | 1.3E-4 | <b>3.4E-5</b> |
|                                    | RMSE             | 1.3E-2     | 6.6E-3 | 5.7E-3 | 6.4E-3 | 1.0E-2 | <b>5.4E-3</b> |
|                                    | MAPE             | 0.60%      | 0.38%  | 0.32%  | 0.35%  | 0.51%  | <b>0.27%</b>  |

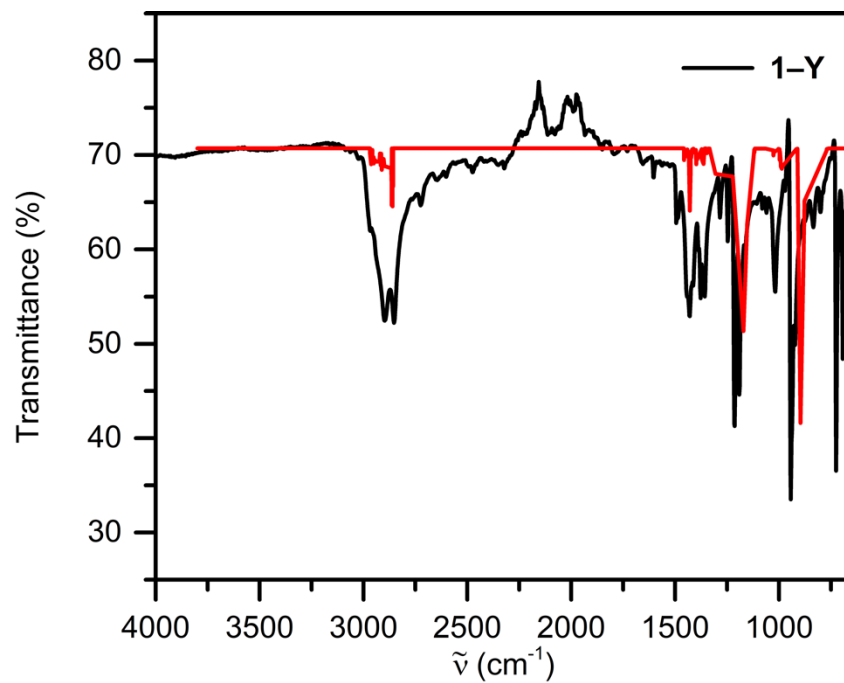

**Figure S72.** Comparison of experimental FTIR spectrum (black) and calculated stretching frequencies (red) of Cp\*<sub>2</sub>Y(TIP), **1-Y**.

**Table S28.** Major contributions of the TDDFT-calculated transitions for Cp\*<sub>2</sub>Y(TIP), **1–Y**, on the def2-TZVP/ECP28MDF(Y,I) level using the TPSSh functional with GD3 dispersion correction and dichloromethane implicit solvent model. The calculated excitation energies were empirically shifted by 0.1 eV. Isovalue for all depictions is 0.04. Oscillator strength cutoff value: 0.01.

| $\lambda$<br>(nm) | $\nu$<br>(cm <sup>-1</sup> ) | Oscillator<br>Strength | Occupied                                                                                   | Virtual                                                                                     | Weight<br>(%) |
|-------------------|------------------------------|------------------------|--------------------------------------------------------------------------------------------|---------------------------------------------------------------------------------------------|---------------|
| 355               | 28150.4                      | 0.0328                 | 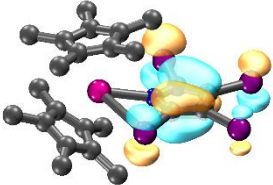<br>146   | <br>148   | 67.6          |
| 332               | 30140.7                      | 0.0105                 | <br>146   | <br>149   | 50.8          |
| 327               | 30580.8                      | 0.0249                 | <br>143  | <br>148  | 49.8          |
| 321               | 31132.8                      | 0.0166                 | <br>145 | <br>149 | 58.0          |
| 314               | 31883.9                      | 0.0211                 | <br>142 | <br>148 | 59.7          |
| 285               | 35030.6                      | 0.0102                 | <br>146 | <br>152 | 67.0          |

|     |         |        |                                                                                            |                                                                                             |      |
|-----|---------|--------|--------------------------------------------------------------------------------------------|---------------------------------------------------------------------------------------------|------|
| 272 | 36769.1 | 0.0200 | 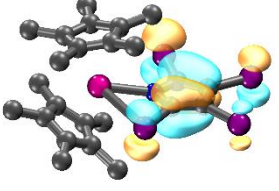<br>146   | <br>153   | 63.7 |
| 270 | 37070.8 | 0.0275 | <br>143   | <br>152   | 56.5 |
| 264 | 37778.2 | 0.1413 | <br>145   | <br>153   | 66.8 |
| 261 | 38355.3 | 0.0183 | <br>142  | <br>152  | 48.3 |
| 260 | 38469.2 | 0.0179 | <br>136 | <br>147 | 68.7 |
| 255 | 39159.9 | 0.0842 | <br>143 | <br>153 | 43.4 |
| 250 | 39949.9 | 0.0881 | <br>145 | <br>154 | 39.9 |



|     |         |        |                                                                                            |                                                                                             |      |
|-----|---------|--------|--------------------------------------------------------------------------------------------|---------------------------------------------------------------------------------------------|------|
| 250 | 40078.2 | 0.0472 | 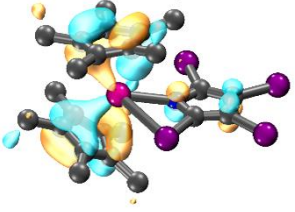<br>145   | <br>154   | 51.9 |
| 247 | 40410.2 | 0.0194 | <br>142   | <br>153   | 43.5 |
| 247 | 40529.4 | 0.0295 | <br>140   | <br>148   | 46.8 |
| 243 | 41076.5 | 0.0353 | <br>144  | <br>154  | 57.4 |
| 242 | 41348.4 | 0.0226 | <br>146 | <br>155 | 67.0 |

**Table S29.** Results of the second order perturbation analysis of **1–Y** from NLMO calculations on the optimized structure of **1–Y**. Only interactions between the tetraiodopyrrole unit and metal ions are shown ( $> 1 \text{ kcal mol}^{-1}$ ).

| Donor NLMO                                                                                    | Acceptor NLMO                                                                                 | E (kcal mol <sup>-1</sup> ) |
|-----------------------------------------------------------------------------------------------|-----------------------------------------------------------------------------------------------|-----------------------------|
| 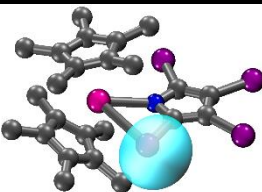<br>LP1 I1   | <br>LV1 Y2   | 1.60                        |
| <br>LP1 I1   | <br>LV2 Y2   | 12.38                       |
| <br>LP2 I1   | <br>LV1 Y2   | 9.92                        |
| <br>LP2 I1 | <br>LV4 Y2 | 1.11                        |
| <br>LP3 I1 | <br>LV1 Y2 | 9.90                        |
| <br>LP3 I1 | <br>LV2 Y2 | 56.61                       |

|                                                                                                  |                                                                                               |       |
|--------------------------------------------------------------------------------------------------|-----------------------------------------------------------------------------------------------|-------|
| 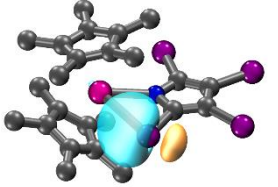<br>LP3 I1      | <br>LV3 Y2   | 1.64  |
| <br>LP1 N3      | <br>LV3 Y2   | 18.38 |
| <br>LP1 N3      | <br>LV5 Y2   | 13.04 |
| <br>LP1 I16    | <br>LV6 Y2  | 2.41  |
| <br>LP3 I16   | <br>LV6 Y2 | 11.93 |
| <br>BD1 I1-C4 | <br>LV2 Y2 | 8.89  |
| <br>BD1 I1-C4 | <br>LV3 Y2 | 2.79  |

|                                                                                                       |                                                                                                   |      |
|-------------------------------------------------------------------------------------------------------|---------------------------------------------------------------------------------------------------|------|
| 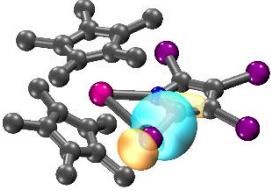 <p>BD1 I1-C4</p>    |  <p>LV6 Y2</p>   | 5.48 |
|  <p>BD1 N3-C4</p>    |  <p>LV3 Y2</p>   | 7.54 |
|  <p>BD1 N3-C5</p>    |  <p>LV3 Y2</p>   | 5.18 |
|  <p>BD2 N3-C5</p>   |  <p>LV4 Y2</p>  | 1.84 |
|  <p>BD1 C4-C17</p> |  <p>LV3 Y2</p> | 1.31 |
|  <p>BD1 C5-I16</p> |  <p>LV3 Y2</p> | 1.88 |
|  <p>BD1 C5-I16</p> |  <p>LV6 Y2</p> | 1.13 |

|                                                                                                     |                                                                                                 |             |
|-----------------------------------------------------------------------------------------------------|-------------------------------------------------------------------------------------------------|-------------|
| 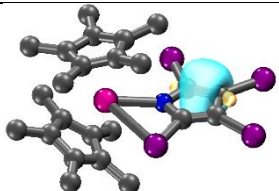 <p>BD1 C5-C18</p> |  <p>LV3 Y2</p> | <p>1.26</p> |
|-----------------------------------------------------------------------------------------------------|-------------------------------------------------------------------------------------------------|-------------|

**Table S30.** Computed and average experimental bond metrics of Cp\*<sub>2</sub>Y(DMP), **2**-Y with six different functionals using the def2-SVP basis and a 28 electron ECP on Y.

| Experimental (Å)                               | Calculated |        |        |        |        |        |        |
|------------------------------------------------|------------|--------|--------|--------|--------|--------|--------|
|                                                | B3LYP      | CAM    | M06    | PBE0   | TPSS   | TPSSh  |        |
| Distances (Å)                                  |            |        |        |        |        |        |        |
| Y <sub>Y1</sub> -C* <sub>avg</sub>             | 2.636      | 2.653  | 2.638  | 2.635  | 2.634  | 2.644  | 2.639  |
| Y <sub>Y1</sub> -C <sup>†</sup> <sub>avg</sub> | 2.632      | 2.655  | 2.639  | 2.632  | 2.635  | 2.644  | 2.639  |
| Y <sub>Y1</sub> -N <sub>N1</sub>               | 2.289      | 2.289  | 2.282  | 2.284  | 2.283  | 2.289  | 2.286  |
| Y <sub>Y1</sub> -C <sub>C4</sub>               | 2.983      | 2.992  | 2.976  | 2.946  | 2.937  | 2.912  | 2.918  |
| Y <sub>Y1</sub> -C <sub>C10</sub>              | 2.993      | 3.045  | 3.020  | 2.968  | 2.966  | 2.936  | 2.941  |
| N <sub>N1</sub> -C <sub>C13</sub>              | 1.375      | 1.374  | 1.368  | 1.367  | 1.367  | 1.379  | 1.374  |
| N <sub>N1</sub> -C <sub>C4</sub>               | 1.384      | 1.386  | 1.380  | 1.382  | 1.379  | 1.394  | 1.388  |
| C <sub>C13</sub> -C <sub>C25</sub>             | 1.379      | 1.392  | 1.384  | 1.388  | 1.389  | 1.399  | 1.394  |
| C <sub>C17</sub> -C <sub>C25</sub>             | 1.413      | 1.423  | 1.420  | 1.417  | 1.417  | 1.424  | 1.421  |
| C <sub>C4</sub> -C <sub>C17</sub>              | 1.378      | 1.391  | 1.383  | 1.387  | 1.388  | 1.398  | 1.393  |
| C <sub>C4</sub> -C <sub>C10</sub>              | 1.503      | 1.502  | 1.501  | 1.495  | 1.497  | 1.506  | 1.503  |
| C <sub>C13</sub> -C <sub>C26</sub>             | 1.496      | 1.499  | 1.496  | 1.491  | 1.493  | 1.503  | 1.500  |
| MD                                             |            | 0.0121 | 0.0068 | 0.0094 | 0.0108 | 0.0186 | 0.0148 |
| MSE                                            |            | 3.4E-4 | 8.8E-5 | 2.0E-4 | 2.7E-4 | 8.0E-4 | 6.3E-4 |
| RMSE                                           |            | 1.8E-2 | 9.4E-3 | 1.4E-2 | 1.6E-2 | 2.8E-2 | 2.5E-2 |
| MAPE                                           |            | 0.56%  | 0.33%  | 0.46%  | 0.51%  | 0.87%  | 0.65%  |

**Table S31.** Computed and average experimental bond metrics of Cp\*<sub>2</sub>Y(DMP), **2–Y** with six different functionals using the def2–SVP basis set and a 28 electron ECP on Y. Relevant atoms selected to better gauge the metal pyrrole interaction.

| Experimental (Å)                   |       | Calculated |        |        |        |        |        |
|------------------------------------|-------|------------|--------|--------|--------|--------|--------|
|                                    |       | B3LYP      | CAM    | M06    | PBE0   | TPSS   | TPSSh  |
| Distances (Å)                      |       |            |        |        |        |        |        |
| Y <sub>Y1</sub> -N <sub>N1</sub>   | 2.289 | 2.289      | 2.282  | 2.284  | 2.283  | 2.289  | 2.286  |
| Y <sub>Y1</sub> -C <sub>C4</sub>   | 2.983 | 2.992      | 2.976  | 2.946  | 2.937  | 2.912  | 2.918  |
| Y <sub>Y1</sub> -C <sub>C10</sub>  | 2.993 | 3.045      | 3.020  | 2.968  | 2.966  | 2.936  | 2.941  |
| N <sub>N1</sub> -C <sub>C13</sub>  | 1.375 | 1.374      | 1.368  | 1.367  | 1.367  | 1.379  | 1.374  |
| N <sub>N1</sub> -C <sub>C4</sub>   | 1.384 | 1.386      | 1.380  | 1.382  | 1.379  | 1.394  | 1.388  |
| C <sub>C13</sub> -C <sub>C25</sub> | 1.379 | 1.392      | 1.384  | 1.388  | 1.389  | 1.399  | 1.394  |
| C <sub>C17</sub> -C <sub>C25</sub> | 1.413 | 1.423      | 1.420  | 1.417  | 1.417  | 1.424  | 1.421  |
| C <sub>C4</sub> -C <sub>C17</sub>  | 1.378 | 1.391      | 1.383  | 1.387  | 1.388  | 1.398  | 1.393  |
| C <sub>C4</sub> -C <sub>C10</sub>  | 1.503 | 1.502      | 1.501  | 1.495  | 1.497  | 1.506  | 1.503  |
| C <sub>C13</sub> -C <sub>C26</sub> | 1.496 | 1.499      | 1.496  | 1.491  | 1.493  | 1.503  | 1.500  |
|                                    | MD    | 0.0104     | 0.0071 | 0.0112 | 0.0125 | 0.0203 | 0.0167 |
|                                    | MSE   | 3.2E-4     | 1.0E-4 | 2.4E-4 | 3.2E-4 | 9.4E-4 | 7.5E-4 |
|                                    | RMSE  | 1.8E-2     | 1.0E-2 | 1.5E-2 | 1.8E-2 | 3.1E-2 | 2.7E-2 |
|                                    | MAPE  | 0.51%      | 0.36%  | 0.55%  | 0.60%  | 0.96%  | 0.74%  |

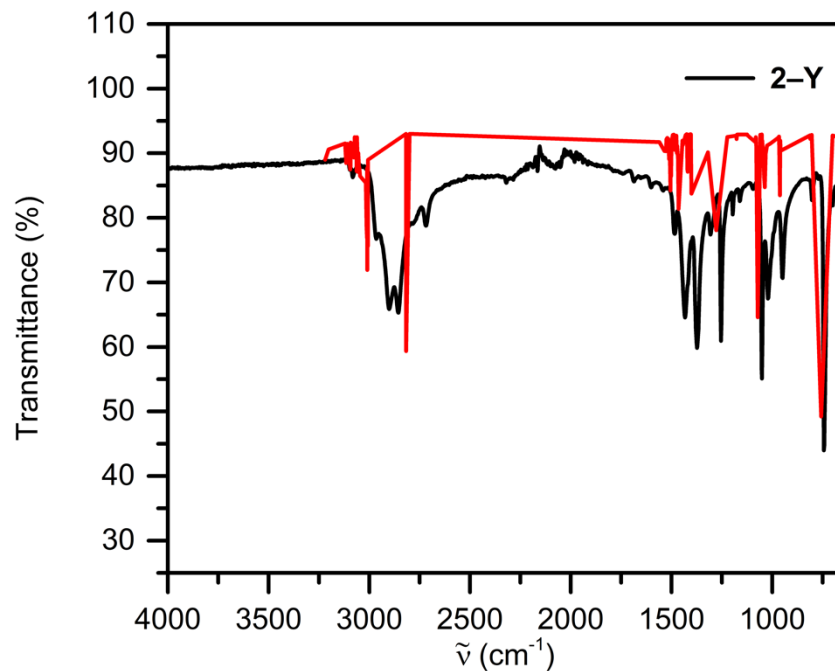

**Figure S73.** Comparison of experimental FTIR spectrum (black) and calculated stretching frequencies (red) of Cp\*<sub>2</sub>Y(DMP), **2-Y**.



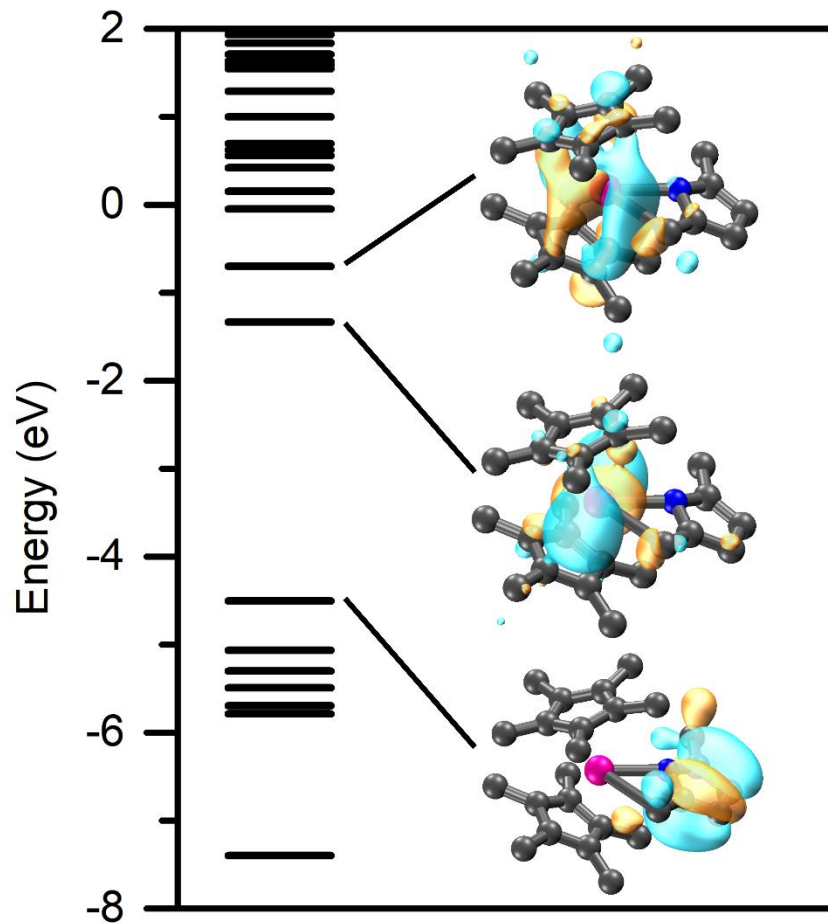

**Figure S74.** Calculated frontier orbitals of Cp\*<sub>2</sub>Y(DMP), 2-Y, with the TPSSh functional and def2-TZVP basis set. All isovalues were set to 0.4.

**Table S32.** Results of the second order perturbation analysis of **2-Y** from NLMO calculations on the optimized structure of **2-Y**. Only strongest interactions between the dimethylpyrrole and metal ions are shown ( $> 1$  kcal/mol).

| Donor NLMO                                                                                        | Acceptor NLMO                                                                                 | E (kcal mol <sup>-1</sup> ) |
|---------------------------------------------------------------------------------------------------|-----------------------------------------------------------------------------------------------|-----------------------------|
| 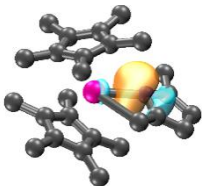<br>LP1 N2       | <br>LV2 Y1   | 29.36                       |
| <br>LP1 N2       | <br>LV4 Y1   | 11.76                       |
| <br>BD1 N2-C6    | <br>LV2 Y1   | 7.93                        |
| <br>BD1 N2-C6  | <br>LV6 Y1 | 1.39                        |
| <br>BD1 N2-C15 | <br>LV2 Y1 | 4.40                        |
| <br>BD1 N2-C15 | <br>LV3 Y1 | 3.11                        |

|                                                                                                    |                                                                                               |       |
|----------------------------------------------------------------------------------------------------|-----------------------------------------------------------------------------------------------|-------|
| 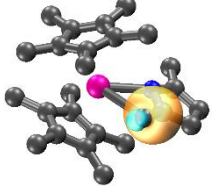<br>BD1 C6–C12    | <br>LV2 Y1   | 3.60  |
| <br>BD1 C6–C12    | <br>LV4 Y1   | 1.55  |
| <br>BD1 C6–C12    | <br>LV5 Y1   | 4.29  |
| <br>BD1 C6–C19   | <br>LV2 Y1  | 1.86  |
| <br>BD1 C12–H32 | <br>LV1 Y1 | 1.48  |
| <br>BD1 C12–H32 | <br>LV5 Y1 | 4.76  |
| <br>BD1 C12–H34 | <br>LV5 Y1 | 11.32 |

|                                                                                                       |                                                                                                  |      |
|-------------------------------------------------------------------------------------------------------|--------------------------------------------------------------------------------------------------|------|
| 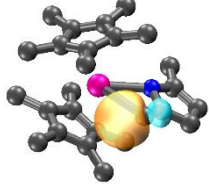 <p>BD1 C12-H34</p>  |  <p>LV6 Y1</p>  | 6.01 |
|  <p>BD1 C15-C27</p>  |  <p>LV2 Y1</p>  | 1.75 |
|  <p>BD1 C15-C27</p>  |  <p>LV2 Y1</p>  | 1.32 |
|  <p>BD1 C23-H49</p> |  <p>LV6 Y1</p> | 2.50 |

**Table S33.** Coordinates of the geometry optimized structure of Cp\*<sub>2</sub>Y(TIP), **1–Y**, on the def2-TZVP/ECP28MDF(Y,I) level using the TPSSh functional with GD3 dispersion correction.

|   |          |          |          |
|---|----------|----------|----------|
| I | 0.24690  | -2.71630 | 0.21770  |
| Y | 2.04110  | -0.02070 | -0.04480 |
| N | -0.30460 | 0.22020  | 0.23690  |
| C | -0.93200 | -0.98760 | 0.15950  |
| C | -1.30690 | 1.14320  | 0.19180  |
| C | 3.20560  | -0.77220 | -2.28700 |
| C | 2.13560  | -0.41750 | 2.57370  |
| C | 3.66220  | 0.55310  | -2.04250 |
| C | 1.41250  | 0.65370  | -2.53430 |
| C | 3.25480  | -1.10980 | 2.03060  |
| C | 2.34860  | 0.97220  | 2.38020  |
| C | 4.16670  | -0.14440 | 1.51960  |
| C | 1.81860  | -0.70480 | -2.60500 |
| C | 3.60000  | 1.14760  | 1.72500  |
| C | 2.54630  | 1.43270  | -2.17100 |
| I | -0.88030 | 3.18040  | 0.22490  |
| C | -2.30810 | -0.86710 | 0.06630  |
| C | -2.55360 | 0.53470  | 0.08900  |
| C | 4.04890  | -2.01470 | -2.34190 |
| C | 0.98210  | -0.99750 | 3.33910  |
| C | 5.09390  | 0.99240  | -1.95920 |
| C | 0.05970  | 1.15920  | -2.93890 |
| C | 3.52910  | -2.58500 | 2.10360  |
| C | 1.47780  | 2.05680  | 2.94070  |
| C | 5.57100  | -0.45580 | 1.09190  |
| C | 0.97660  | -1.81850 | -3.15530 |
| C | 4.26890  | 2.47240  | 1.49310  |
| C | 2.60900  | 2.93270  | -2.10760 |
| I | -3.68060 | -2.41090 | -0.06040 |
| I | -4.39890 | 1.47240  | -0.01540 |
| H | 4.97670  | -1.89740 | -1.77890 |
| H | 4.32280  | -2.26320 | -3.37340 |
| H | 3.52010  | -2.88140 | -1.93400 |
| H | 0.01990  | -0.65370 | 2.94930  |
| H | 1.03470  | -0.69620 | 4.39090  |
| H | 0.98330  | -2.08710 | 3.30650  |
| H | 5.23460  | 1.83090  | -1.27510 |
| H | 5.43640  | 1.32430  | -2.94620 |
| H | 5.75210  | 0.18370  | -1.64370 |
| H | 1.60590  | 3.00050  | 2.40930  |
| H | 1.72570  | 2.23510  | 3.99400  |
| H | 0.42010  | 1.79120  | 2.89330  |

|   |          |          |          |
|---|----------|----------|----------|
| H | 1.65600  | 3.36240  | -1.79270 |
| H | 2.85220  | 3.35460  | -3.08960 |
| H | 3.37670  | 3.27490  | -1.40990 |
| H | -0.74520 | 0.54260  | -2.53280 |
| H | -0.03640 | 1.14880  | -4.03060 |
| H | -0.10690 | 2.18290  | -2.60360 |
| H | 2.62400  | -3.15020 | 2.33200  |
| H | 3.93880  | -2.97380 | 1.16590  |
| H | 1.35020  | -2.79980 | -2.85940 |
| H | 0.97980  | -1.78090 | -4.25110 |
| H | -0.06390 | -1.74460 | -2.83130 |
| H | 5.08710  | 2.39320  | 0.77660  |
| H | 4.68980  | 2.86210  | 2.42670  |
| H | 3.56920  | 3.22440  | 1.11890  |
| H | 5.61930  | -1.29530 | 0.39330  |
| H | 6.17500  | -0.73270 | 1.96370  |
| H | 6.05190  | 0.40100  | 0.62200  |
| H | 4.26230  | -2.80680 | 2.88740  |

**Table S34.** Coordinates of the geometry optimized structure of Cp\*<sub>2</sub>Y(DMP), **2–Y**, on the def2-TZVP/ECP28MDF(Y) level using the TPSSh functional with GD3 dispersion correction.

|   |          |          |          |
|---|----------|----------|----------|
| Y | -0.16090 | -0.00820 | -0.08290 |
| N | 1.97330  | -0.81290 | 0.06460  |
| C | -1.77360 | -1.81270 | -1.14760 |
| C | -0.81150 | -2.55580 | -0.40640 |
| C | -0.88960 | 2.42620  | -0.83950 |
| C | 2.44080  | -0.67620 | -1.23380 |
| C | 0.53550  | 2.41500  | -0.88590 |
| C | -1.28240 | 2.31670  | 0.52200  |
| C | -0.09820 | 2.20940  | 1.31190  |
| C | -1.00210 | -2.26120 | 0.96790  |
| C | 1.02340  | 2.29030  | 0.44150  |
| C | 1.50600  | -0.66160 | -2.40560 |
| C | -2.58190 | -1.08920 | -0.22460 |
| C | -2.09880 | -1.36040 | 1.08670  |
| C | 3.07630  | -0.87950 | 0.87820  |
| C | -2.01990 | -1.87570 | -2.62910 |
| C | 0.18810  | -3.54380 | -0.93510 |
| C | -1.79420 | 2.66310  | -2.01600 |
| C | 3.82460  | -0.66180 | -1.23690 |
| C | 1.39220  | 2.66750  | -2.09340 |
| C | -2.66220 | 2.53920  | 1.06700  |
| C | -0.05330 | 2.16790  | 2.81380  |
| C | -0.23880 | -2.88100 | 2.10140  |
| C | 2.47050  | 2.34430  | 0.82930  |
| C | -3.84730 | -0.36930 | -0.58870 |
| C | -2.72990 | -0.94890 | 2.38630  |
| C | 4.22900  | -0.79970 | 0.11390  |
| C | 2.94490  | -1.00420 | 2.36310  |
| H | 2.63160  | 1.96740  | 1.84010  |
| H | 2.83410  | 3.37820  | 0.80140  |
| H | 3.09080  | 1.74840  | 0.15610  |
| H | 1.03750  | -1.63080 | -2.59590 |
| H | 2.04510  | -0.36600 | -3.30640 |
| H | 0.68810  | 0.09340  | -2.34900 |
| H | -3.43440 | 2.30580  | 0.33400  |
| H | -2.78950 | 3.59110  | 1.34890  |
| H | -2.85430 | 1.94410  | 1.96130  |
| H | -2.28860 | -0.89730 | -3.03900 |
| H | -2.84720 | -2.55620 | -2.86130 |
| H | -1.14360 | -2.23240 | -3.17340 |
| H | -1.48530 | 2.08990  | -2.89590 |
| H | -1.79250 | 3.71930  | -2.30790 |

|   |          |          |          |
|---|----------|----------|----------|
| H | -2.82600 | 2.39040  | -1.78980 |
| H | 5.24260  | -0.82920 | 0.48840  |
| H | 4.45960  | -0.58730 | -2.10870 |
| H | 0.10880  | -3.65190 | -2.01840 |
| H | 0.01410  | -4.53230 | -0.49860 |
| H | 1.21470  | -3.25120 | -0.69500 |
| H | 2.14040  | -0.36870 | 2.74900  |
| H | 3.87150  | -0.70140 | 2.85460  |
| H | 2.72290  | -2.02980 | 2.67740  |
| H | -4.22150 | 0.23360  | 0.23820  |
| H | -4.63230 | -1.08840 | -0.85000 |
| H | -3.71850 | 0.28810  | -1.45240 |
| H | -1.98830 | -0.62850 | 3.12420  |
| H | -3.27810 | -1.78680 | 2.83130  |
| H | -3.43840 | -0.13170 | 2.25050  |
| H | 2.30720  | 2.07050  | -2.06490 |
| H | 1.68870  | 3.72170  | -2.13730 |
| H | 0.86390  | 2.44230  | -3.02280 |
| H | -0.92110 | 1.65090  | 3.23130  |
| H | -0.04680 | 3.17900  | 3.23680  |
| H | 0.84440  | 1.66250  | 3.17760  |
| H | 0.76930  | -3.15670 | 1.78900  |
| H | -0.73850 | -3.78850 | 2.46080  |
| H | -0.15120 | -2.20390 | 2.95510  |



**Table S35.** Coordinates of Cp\*<sub>2</sub>Dy(TIP), **1-Dy**, at 100 K, with optimized hydrogen positions.

|    |                   |                   |                   |
|----|-------------------|-------------------|-------------------|
| Dy | 6.87044882041268  | 10.15230231328233 | 7.07452302479285  |
| I  | 4.22430280102981  | 8.71054934477510  | 5.90512126831061  |
| N  | 5.95046331016978  | 11.00494350502335 | 5.06071145869707  |
| C  | 4.80833888547841  | 10.33051666856639 | 4.72680802257397  |
| C  | 8.77599032907106  | 9.22711190702915  | 5.46582988055701  |
| C  | 7.96448381341903  | 8.10041649331064  | 5.78895890930684  |
| C  | 9.05683406560790  | 8.79332759524651  | 7.70370996444711  |
| C  | 5.45510002910332  | 12.16615490809824 | 8.05232829015044  |
| C  | 6.79862566312540  | 12.39456466462319 | 8.45225852072130  |
| C  | 9.43013476098532  | 9.66093424377439  | 6.64442483983303  |
| C  | 4.98806448576127  | 11.02036688293468 | 8.75561777903726  |
| C  | 6.04751011899796  | 10.52582042543248 | 9.57064347294735  |
| C  | 7.16018571160297  | 11.38999835345509 | 9.40137335044199  |
| C  | 8.13356883853426  | 7.84082610151463  | 7.17285958509276  |
| I  | 7.58996294331310  | 13.38987607757546 | 4.20292483415212  |
| C  | 6.03227738517249  | 12.02117670101825 | 4.14426872742210  |
| C  | 4.15992456021457  | 10.89076341798967 | 3.63564599795484  |
| C  | 8.98417618952766  | 9.74185189129471  | 4.06763679759795  |
| C  | 7.27733501535021  | 7.23620336868289  | 4.77091546052058  |
| C  | 9.72446620828291  | 8.67765276461745  | 9.04665782016405  |
| C  | 4.62305431402863  | 13.05839689972338 | 7.17976559866276  |
| C  | 7.66043748119707  | 13.58752448037250 | 8.11075580018650  |
| C  | 10.47622077572001 | 10.73644194530238 | 6.71599739719964  |
| C  | 3.55639651946455  | 10.54664468073302 | 8.82762837884014  |
| C  | 5.95151308707335  | 9.40287319344890  | 10.55437585648375 |
| C  | 8.37979177097281  | 11.43915534585026 | 10.27578870604038 |
| C  | 7.53127849816069  | 6.68204435429076  | 7.92879238705668  |
| C  | 4.96885939777631  | 11.98978908139309 | 3.25722456431806  |
| I  | 2.44093899948921  | 10.19464351904115 | 2.74286585409705  |
| H  | 8.04423716709351  | 9.80921301840396  | 3.50828247657827  |
| H  | 9.65022002980606  | 9.06911328151486  | 3.50745174097003  |
| H  | 9.44299928116371  | 10.73500868662061 | 4.05946731441358  |
| H  | 6.57147109716937  | 6.53626199635902  | 5.22809890840387  |
| H  | 8.02164167182340  | 6.63860617063523  | 4.22435352455743  |
| H  | 6.72900273933656  | 7.82349400878124  | 4.02472611875358  |
| H  | 10.23073399431726 | 9.60085084392836  | 9.33892671099242  |
| H  | 10.48832777216739 | 7.88673135840780  | 9.01428744965203  |
| H  | 9.02384259307757  | 8.40783917186937  | 9.84507008991500  |
| H  | 5.24188129766537  | 13.67378656691240 | 6.51962006533303  |
| H  | 4.01416251247282  | 13.74079665413321 | 7.79020585631967  |
| H  | 3.93601183470487  | 12.49033955364488 | 6.54209293385320  |
| H  | 8.68650751504856  | 13.30523756207196 | 7.84278111240479  |
| H  | 7.73029174752342  | 14.26653424927025 | 8.97311665014365  |

|   |                   |                   |                   |
|---|-------------------|-------------------|-------------------|
| H | 7.24922567847433  | 14.15826132968635 | 7.27405446607515  |
| H | 10.27404255618419 | 11.55204683225462 | 6.01156947855637  |
| H | 11.47108235955108 | 10.33783270004801 | 6.46986846387637  |
| H | 10.54639681825004 | 11.17582682704763 | 7.71768248403106  |
| H | 2.99433198415869  | 10.77977445454790 | 7.91810584061368  |
| H | 3.04243930330559  | 11.04454367271187 | 9.66351499556010  |
| H | 3.48035736763346  | 9.46763365594572  | 9.00137691319372  |
| H | 5.31606371185644  | 8.58494902865116  | 10.19175625700419 |
| H | 5.51533948340023  | 9.74034036811042  | 11.50643495977570 |
| H | 6.93383895717492  | 8.97722675880396  | 10.78707515205629 |
| H | 8.55470890282830  | 10.49594190037046 | 10.79879428338522 |
| H | 8.25286411120795  | 12.21592973905473 | 11.04478224943578 |
| H | 9.29039144214281  | 11.69336998535828 | 9.72093820394140  |
| H | 7.31822342640458  | 6.93594740619459  | 8.97440588833339  |
| H | 8.21152361274300  | 5.81774015733870  | 7.94342849377596  |
| H | 6.59441600385608  | 6.34343001590135  | 7.47115584827923  |
| I | 4.61375824841552  | 13.29823091702060 | 1.68998252220936  |

**Table S36.** Coordinates of Cp\*<sub>2</sub>Dy(TIP), **1-Dy**, at 200 K, with optimized hydrogen positions.

|    |                   |                   |                   |
|----|-------------------|-------------------|-------------------|
| Dy | 6.84953950859797  | 10.25797456473941 | 7.08147419803093  |
| I  | 4.20756017476614  | 8.83096353977631  | 5.86603239423677  |
| N  | 5.96654944936772  | 11.10350344490065 | 5.03944106411165  |
| C  | 4.81774342308472  | 10.45170544761234 | 4.70236273419940  |
| C  | 8.76806801032263  | 9.30557956912269  | 5.51099421627338  |
| C  | 7.96916584559699  | 8.18523723854363  | 5.85802125756453  |
| C  | 9.02662986237387  | 8.90131138349127  | 7.75656828108749  |
| C  | 5.37682836642864  | 12.24210367308627 | 8.04972994028863  |
| C  | 6.71521697723490  | 12.50270375260304 | 8.42601922780599  |
| C  | 9.40676777642135  | 9.75464994935058  | 6.68658637781398  |
| C  | 4.94997711284253  | 11.09304003381569 | 8.76766988721158  |
| C  | 6.02108124717197  | 10.64369284013025 | 9.57801202846218  |
| C  | 7.10406215199972  | 11.52699298621255 | 9.38886508299542  |
| C  | 8.11484728112117  | 7.95051341096037  | 7.24080765521354  |
| I  | 7.62846109522279  | 13.48366954962316 | 4.18671280648556  |
| C  | 6.05900463041193  | 12.13148549701086 | 4.13710841539235  |
| C  | 4.18237801576619  | 11.02007985278288 | 3.62627585764868  |
| C  | 9.00237275023967  | 9.79214106879377  | 4.11876846606394  |
| C  | 7.28519517991890  | 7.30433246205622  | 4.84958699541071  |
| C  | 9.69110211217630  | 8.81531403218130  | 9.09287768947522  |
| C  | 4.52734705415678  | 13.09548826124230 | 7.16379500779101  |
| C  | 7.54799025938949  | 13.71507417701219 | 8.08597828334025  |
| C  | 10.44577654974178 | 10.84086981112529 | 6.73649216991763  |
| C  | 3.52977331596952  | 10.58768771468838 | 8.85568873160658  |
| C  | 5.94405904929361  | 9.52465016188862  | 10.57950153119019 |
| C  | 8.32740382390675  | 11.61283013913820 | 10.26391784063751 |
| C  | 7.52307691356876  | 6.80647131903652  | 8.01536456776505  |
| C  | 5.00054983598928  | 12.11074240755668 | 3.24789556893000  |
| I  | 2.46106636616715  | 10.35315871423977 | 2.71612033223583  |
| H  | 8.08015183993165  | 9.82116168363416  | 3.52741827821689  |
| H  | 9.70435417983328  | 9.12885588441170  | 3.59185264345663  |
| H  | 9.43254179181992  | 10.79790540780528 | 4.10021539079645  |
| H  | 6.56999043963829  | 6.61789614029334  | 5.31283871656791  |
| H  | 8.03023791993727  | 6.69030232264388  | 4.32258631747113  |
| H  | 6.74834766656243  | 7.87868241571561  | 4.08557666596940  |
| H  | 10.19464525437273 | 9.74539645208680  | 9.36786410293796  |
| H  | 10.45886780749800 | 8.02743042317900  | 9.07779006706391  |
| H  | 8.99550916838912  | 8.55892508036453  | 9.90016147819751  |
| H  | 5.13258910670252  | 13.71723645697112 | 6.49708300088597  |
| H  | 3.89774812036746  | 13.77210514015526 | 7.75955392859994  |
| H  | 3.85653247979568  | 12.50375765862388 | 6.53033339702164  |
| H  | 8.58521945194889  | 13.45822026508481 | 7.83695577180528  |
| H  | 7.58579690229315  | 14.40289562692853 | 8.94319285347322  |

|   |                   |                   |                   |
|---|-------------------|-------------------|-------------------|
| H | 7.13704813595954  | 14.26873840792997 | 7.23767161205759  |
| H | 10.21417286679945 | 11.66141974449037 | 6.04698464249352  |
| H | 11.43615159352323 | 10.45521203834750 | 6.45460235201627  |
| H | 10.54433295767222 | 11.27190606542937 | 7.73921950580760  |
| H | 2.94612634159444  | 10.83810190520515 | 7.96481429596520  |
| H | 3.02377731027403  | 11.04871668457169 | 9.71690906355961  |
| H | 3.47506324561155  | 9.50239561228345  | 8.99633144647801  |
| H | 5.33124444238665  | 8.68910758630354  | 10.21944056625057 |
| H | 5.49079550599119  | 9.86466760352369  | 11.52217190154162 |
| H | 6.93382579744289  | 9.12577473804079  | 10.82592158162361 |
| H | 8.51344721116254  | 10.68249251649518 | 10.80537044343027 |
| H | 8.18939865417164  | 12.40366857637014 | 11.01610049439026 |
| H | 9.23501917925178  | 11.86695704596971 | 9.70435917542239  |
| H | 7.33053501464728  | 7.07259972747787  | 9.06142156719935  |
| H | 8.19908129627657  | 5.93881513303592  | 8.02731400096108  |
| H | 6.57620844369676  | 6.46414874589415  | 7.58121236498656  |
| I | 4.65651573519826  | 13.44689990801190 | 1.70721376416623  |

**Table S37.** Coordinates of Cp\*<sub>2</sub>Dy(TIP), **1-Dy**, at 300 K, with optimized hydrogen positions.

|    |                   |                   |                   |
|----|-------------------|-------------------|-------------------|
| Dy | 6.81619973618705  | 10.33596810347693 | 7.13271299605419  |
| I  | 4.16390617741545  | 8.92398764562069  | 5.87614535355595  |
| N  | 5.95114411695721  | 11.18350974927183 | 5.07819623475085  |
| C  | 4.80679769688728  | 10.53368192733775 | 4.72152896375780  |
| C  | 8.75398398309884  | 9.36765752294352  | 5.59694552114024  |
| C  | 7.94519364326909  | 8.25244092072064  | 5.93714755248902  |
| C  | 8.98391653737404  | 8.96844317358133  | 7.84078787813750  |
| C  | 5.30159962821177  | 12.27675342181828 | 8.10557149122426  |
| C  | 6.63296463831642  | 12.57953798080780 | 8.49198294101707  |
| C  | 9.37539400627710  | 9.79650179791494  | 6.77180804805238  |
| C  | 4.90662255890697  | 11.12619560397728 | 8.84076947739763  |
| C  | 5.98667356325581  | 10.71900134298294 | 9.62559905080948  |
| C  | 7.04366430455211  | 11.61718925715262 | 9.43611828286896  |
| C  | 8.07109627579842  | 8.01851354692957  | 7.31052026015686  |
| H  | 2.89402567482575  | 10.84539132901535 | 8.06524499378562  |
| I  | 7.64034068510867  | 13.55238389784977 | 4.23454078759556  |
| C  | 6.05587266349013  | 12.20610433225215 | 4.17908362907234  |
| C  | 4.18775212108028  | 11.12409292177884 | 3.64499757587053  |
| C  | 9.00896672251942  | 9.82402685947521  | 4.20365587356927  |
| C  | 7.24817329142216  | 7.34893476880664  | 4.92781499527365  |
| C  | 9.62532956015110  | 8.88906987048777  | 9.18857066206655  |
| C  | 4.42388824245555  | 13.11706243753602 | 7.23093698016044  |
| C  | 7.41428653880042  | 13.83833535916488 | 8.12392274661813  |
| C  | 10.40529634377748 | 10.90029875039912 | 6.83635354509952  |
| C  | 3.49264804071495  | 10.59557044697153 | 8.94585414500186  |
| C  | 5.94216179252536  | 9.60638612167153  | 10.66103306891467 |
| C  | 8.27446123572347  | 11.72646227903120 | 10.31799664252912 |
| C  | 7.46485743006011  | 6.87953818613181  | 8.08252434113455  |
| C  | 5.01252844211819  | 12.19882625871512 | 3.29838027777860  |
| I  | 2.46419398248255  | 10.47309561468449 | 2.72277267164397  |
| H  | 8.09485902381789  | 9.84134949849810  | 3.59954489803826  |
| H  | 9.71707952906742  | 9.14924010019064  | 3.70010041148332  |
| H  | 9.44047437892300  | 10.82913007814296 | 4.16637522227115  |
| H  | 6.52439842885870  | 6.68255896714461  | 5.40546900525445  |
| H  | 7.99192744024966  | 6.71838471408534  | 4.41986037017416  |
| H  | 6.72284135320692  | 7.91674386422652  | 4.15158033206731  |
| H  | 10.12509219480702 | 9.82045372871309  | 9.46646206101152  |
| H  | 10.39295017842399 | 8.10091241772284  | 9.19221925031873  |
| H  | 8.91534499126526  | 8.63805266047892  | 9.98447663396112  |
| H  | 5.00714432115588  | 13.72498943651476 | 6.53249240269173  |
| H  | 3.81360903598513  | 13.80537576360701 | 7.83329333671328  |
| H  | 3.73368756384369  | 12.51374378699535 | 6.63013152883509  |
| H  | 8.46654433261484  | 13.62755329756490 | 7.89722873683266  |

|   |                   |                   |                   |
|---|-------------------|-------------------|-------------------|
| H | 7.39966597559610  | 14.54787038029788 | 8.96336703497222  |
| H | 6.98334143203622  | 14.34127484455224 | 7.25495609444874  |
| H | 10.18094603160965 | 11.70905121276678 | 6.13098249653396  |
| H | 11.40660767056954 | 10.52283621560843 | 6.58422029631653  |
| H | 10.47291353368963 | 11.34308486505678 | 7.83633492765386  |
| H | 2.99425807065588  | 11.04200982052822 | 9.81865931253675  |
| H | 3.45704853532419  | 9.50817156359526  | 9.07726613545306  |
| H | 5.30931521226007  | 8.77176411958565  | 10.33725083115480 |
| H | 5.52860865604863  | 9.97176118972460  | 11.61183874931282 |
| H | 6.93796270428314  | 9.20517216817501  | 10.87471204024293 |
| H | 8.47491532345628  | 10.79995765770618 | 10.86001781504469 |
| H | 8.12015347696926  | 12.51622960211123 | 11.06740314375194 |
| H | 9.17609414113093  | 11.99512340674098 | 9.75575485355117  |
| H | 7.29267471993841  | 7.14144214092910  | 9.13294027909462  |
| H | 8.12284148273914  | 5.99811704665105  | 8.07777597433597  |
| H | 6.50494937098769  | 6.55965152258257  | 7.65988628803887  |
| I | 4.69318125672229  | 13.55035250099497 | 1.75260255037731  |

**Table S38.** Coordinates of Cp\*<sub>2</sub>Dy(DMP), **2-Dy**, at 100 K, with optimized hydrogen positions.

|    |                   |                   |                  |
|----|-------------------|-------------------|------------------|
| Dy | 1.72076627644233  | 6.27482335048025  | 3.99713690248379 |
| N  | -0.15745262591005 | 5.82171264459260  | 5.24277301077361 |
| C  | 1.58312613870246  | 5.01598184302940  | 1.68341954483033 |
| C  | 0.25991293435822  | 5.45054704604919  | 1.96079635171844 |
| C  | 4.22828742393703  | 6.39900029863462  | 4.81357439862223 |
| C  | 2.85894239621189  | 8.13854996202920  | 5.43963426951118 |
| C  | -0.02223818835706 | 4.51108699671905  | 5.66307490163642 |
| C  | 0.25385873428220  | 6.87126400051639  | 1.91094141997567 |
| C  | 2.38833182763258  | 6.16482145556559  | 1.42156895235857 |
| C  | 2.64260384957302  | 7.06338363642457  | 6.33912670058489 |
| C  | 3.48302272794396  | 5.99154415537630  | 5.95212147002002 |
| C  | 3.85496810570914  | 7.72943811883714  | 4.50592969475718 |
| C  | 1.55113426929993  | 7.31040639283318  | 1.57627037636620 |
| C  | -1.12572528779368 | 6.38627703571888  | 6.03814103651847 |
| C  | 2.07352914707616  | 3.59277338301952  | 1.55745017950452 |
| C  | -0.94450804105088 | 4.56385524925782  | 2.17601154905526 |
| C  | 5.28749420479477  | 5.57084790181359  | 4.13236929491092 |
| C  | 2.23144278685569  | 9.50900999250608  | 5.51076116350766 |
| C  | -0.89224629761503 | 4.24442182336562  | 6.70043282676648 |
| C  | 0.93294686205352  | 3.56401337224056  | 4.99795152669102 |
| C  | -0.93779738454850 | 7.77086200802621  | 2.10036810450672 |
| C  | 3.77901581783609  | 6.12492196946642  | 0.85764494396614 |
| C  | 1.76492156494883  | 7.08307787305688  | 7.56569591500242 |
| C  | 3.68958510268392  | 4.72134031409211  | 6.73120187747519 |
| C  | 4.55365305050013  | 8.66057344414328  | 3.54418767259677 |
| C  | 1.90701539527006  | 8.74476421019451  | 1.24427790024915 |
| C  | -1.60699744934042 | 5.44274425159704  | 6.93388204034057 |
| C  | -1.52976853078333 | 7.81893399242078  | 5.89095418267708 |
| H  | 1.33059881908459  | 2.87032258386325  | 1.90819412652905 |
| H  | 2.99843415290252  | 3.41352434778013  | 2.12227282040029 |
| H  | 2.29438714304326  | 3.34487849377941  | 0.50948097049189 |
| H  | -1.39448211062943 | 4.70336214209431  | 3.16739589282496 |
| H  | -0.68469434440396 | 3.50610012774452  | 2.06920181870300 |
| H  | -1.71750814193568 | 4.77966810700616  | 1.42665340780682 |
| H  | 5.60891664304563  | 6.02426739408099  | 3.19022120387318 |
| H  | 4.94803930828063  | 4.54987411777537  | 3.91072175465054 |
| H  | 6.18107934363736  | 5.47132808998519  | 4.76528885083873 |
| H  | 1.32026377119162  | 9.50499427466755  | 6.11683114197169 |
| H  | 1.97030428059706  | 9.90290453060759  | 4.51989835361797 |
| H  | 2.91761878768237  | 10.23714132204436 | 5.96685583186229 |
| H  | -1.00822263202094 | 3.29760055005229  | 7.20971393015896 |
| H  | 1.96872199006799  | 3.94395245589875  | 4.89533898566642 |
| H  | 0.59920600720587  | 3.23766970160052  | 4.00966226314050 |

|   |                   |                  |                   |
|---|-------------------|------------------|-------------------|
| H | 1.05405173746769  | 2.67093571303537 | 5.61300623505021  |
| H | -0.68579804141029 | 8.68741389018824 | 2.64834610150527  |
| H | -1.73678068098597 | 7.26270447738304 | 2.64990750315381  |
| H | -1.35285761768062 | 8.08700295877705 | 1.13180544186365  |
| H | 4.38274075746306  | 5.32231062537987 | 1.29588666934770  |
| H | 4.31598406299356  | 7.06665413956238 | 1.00545030073597  |
| H | 3.74834294285124  | 5.94128272139814 | -0.22683878584947 |
| H | 1.14023492918319  | 6.18526444874859 | 7.64235873390988  |
| H | 1.09265407605509  | 7.94542923265247 | 7.56891710139220  |
| H | 2.38010101241505  | 7.14569373601935 | 8.47479905901418  |
| H | 4.07267985377513  | 3.90700100023586 | 6.10514478864214  |
| H | 2.76402735772237  | 4.37898756466839 | 7.20855359509266  |
| H | 4.42611858438760  | 4.87933773109657 | 7.53272535873031  |
| H | 3.88457911741084  | 9.43791133518855 | 3.16289052267484  |
| H | 4.98360602860838  | 8.13432750236984 | 2.68669826209815  |
| H | 5.38244181404369  | 9.17421811943355 | 4.05331277056310  |
| H | 2.98229161049396  | 8.87019010402746 | 1.09189531648878  |
| H | 1.59395158255416  | 9.45170046048661 | 2.02377210742200  |
| H | 1.40652115605558  | 9.05797338853586 | 0.31709822659604  |
| H | -2.38010277329381 | 5.60824538729714 | 7.67157635367818  |
| H | -2.02441351465732 | 8.01600452623303 | 4.93464028915418  |
| H | -0.67332112751728 | 8.49788672994567 | 5.95809054205188  |
| H | -2.22695069639731 | 8.09463924634929 | 6.68386394674084  |



## References

1. Y. Guo, K. Sivalingam, C. Kollmar and F. Neese, *J. Chem. Phys.*, 2021, **154**, 214113.
2. F. Neese, *WIREs Comput. Mol. Sci.*, 2022, **12**, e1606.
3. M. Douglas and N. M. Kroll, *Ann. Phys.*, 1974, **82**, 89–155.
4. F. Weigend and R. Ahlrichs, *Phys. Chem. Chem. Phys.*, 2005, **7**, 3297–3305.
5. J. D. Rolfes, F. Neese and D. A. Pantazis, *J. Comput. Chem.*, 2020, **41**, 1842–1849.
6. G. L. Stoychev, A. A. Auer and F. Neese, *J. Chem. Theory Comput.*, 2017, **13**, 554–562.
7. C. Adamo and V. Barone, *J. Chem. Phys.*, 1999, **110**, 6158–6170.
8. J. P. Perdew, K. Burke and M. Ernzerhof, *Phys. Rev. Lett.*, 1996, **77**, 3865–3868.
9. J. P. Perdew, K. Burke and M. Ernzerhof, *Phys. Rev. Lett.*, 1997, **78**, 1396–1396.
10. C. Angeli, R. Cimiraglia, S. Evangelisti, T. Leininger and J.-P. Malrieu, *J. Chem. Phys.*, 2001, **114**, 10252–10264.
11. C. Angeli, R. Cimiraglia and J.-P. Malrieu, *J. Chem. Phys.*, 2002, **117**, 9138–9153.
12. C. Kollmar, K. Sivalingam, Y. Guo and F. Neese, *J. Chem. Phys.*, 2021, **155**, 234104.
13. F. Neese, *J. Chem. Phys.*, 2005, **122**, 034107.
14. M. Atanasov, D. Aravena, E. Suturina, E. Bill, D. Maganas and F. Neese, *Coord. Chem. Rev.*, 2015, **289–290**, 177–214.
15. L. Visscher and K. G. Dyall, *At. Data Nucl. Data Tables*, 1997, **67**, 207–224.
16. J. R. Pliego, *Chem. Phys. Lett.*, 2003, **367**, 145–149.
17. M. Rupp, R. Korner and I. V. Tetko, *Comb. Chem. High Throughput Screen.*, 2011, **14**, 307–327.
18. Determining the  $pK_a$  of Simple Molecules Using Gaussian 2009, S. A. McKee and T. V. Pogorelov, 2019.
